# Supplementary material for: Comparative efficacy and acceptability of treatments for depressive symptoms in cognitive impairment: A systematic review and Bayesian network meta-analysis
Source: Frontiers journal article supplement (doi:10.3389/fnagi.2022.1037414), 2022-12-12
Supplement: Data_Sheet_1.zip [file Data_Sheet_1.zip]

A. Cornell Scale for Depression

| Drug                              | Rank 1 | Rank 2 | Rank 3 | Rank 4 | Rank 5 | Rank 6 | Rank 7 | Rank 8 | Rank 9 | Rank 10 | Rank 11 | Rank 12 | Rank 13 | Rank 14 | Rank 15 | Rank 16 | Rank 17 | Rank 18 | Rank 19 |
|-----------------------------------|--------|--------|--------|--------|--------|--------|--------|--------|--------|---------|---------|---------|---------|---------|---------|---------|---------|---------|---------|
| Aerobic Exercise                  | 0      | 0.61   | 0.22   | 0.06   | 0.03   | 0.02   | 0.01   | 0.01   | 0.01   | 0.01    | 0       | 0       | 0       | 0       | 0       | 0       | 0.01    | 0.01    | 0       |
| Aripiprazole                      | 0      | 0.01   | 0.04   | 0.09   | 0.16   | 0.18   | 0.15   | 0.11   | 0.07   | 0.05    | 0.04    | 0.04    | 0.02    | 0.01    | 0.01    | 0.01    | 0.01    | 0.01    | 0       |
| Behavioral Training               | 0      | 0      | 0      | 0.01   | 0.04   | 0.09   | 0.17   | 0.21   | 0.2    | 0.12    | 0.07    | 0.04    | 0.02    | 0.01    | 0       | 0       | 0       | 0       | 0       |
| Citalopram                        | 0      | 0.02   | 0.03   | 0.07   | 0.1    | 0.09   | 0.09   | 0.07   | 0.05   | 0.05    | 0.05    | 0.04    | 0.04    | 0.05    | 0.04    | 0.04    | 0.05    | 0.05    | 0.08    |
| Cognitive stimulated training     | 0      | 0      | 0      | 0      | 0      | 0      | 0      | 0.01   | 0.02   | 0.04    | 0.06    | 0.08    | 0.11    | 0.12    | 0.14    | 0.13    | 0.11    | 0.09    | 0.08    |
| Discontinuation of antipsychotics | 0      | 0      | 0.01   | 0.02   | 0.05   | 0.07   | 0.08   | 0.08   | 0.07   | 0.06    | 0.06    | 0.06    | 0.05    | 0.04    | 0.04    | 0.05    | 0.05    | 0.09    | 0.12    |
| Electrical Current Therapy        | 0      | 0.2    | 0.15   | 0.35   | 0.11   | 0.07   | 0.04   | 0.02   | 0.02   | 0.01    | 0.02    | 0.01    | 0.01    | 0       | 0       | 0       | 0       | 0       | 0       |
| Exercise                          | 0      | 0      | 0      | 0      | 0      | 0.01   | 0.02   | 0.03   | 0.04   | 0.07    | 0.08    | 0.11    | 0.11    | 0.12    | 0.1     | 0.1     | 0.08    | 0.1     | 0.04    |
| Light therapy                     | 0      | 0      | 0.01   | 0.02   | 0.03   | 0.05   | 0.06   | 0.07   | 0.09   | 0.1     | 0.11    | 0.1     | 0.08    | 0.06    | 0.05    | 0.04    | 0.04    | 0.04    | 0.04    |
| Massage                           | 1      | 0      | 0      | 0      | 0      | 0      | 0      | 0      | 0      | 0       | 0       | 0       | 0       | 0       | 0       | 0       | 0       | 0       | 0       |
| Mirtazapine                       | 0      | 0      | 0      | 0.01   | 0.01   | 0.04   | 0.05   | 0.07   | 0.09   | 0.11    | 0.12    | 0.1     | 0.08    | 0.08    | 0.06    | 0.05    | 0.05    | 0.05    | 0.03    |
| Multidomain Therapy               | 0      | 0      | 0      | 0.01   | 0.02   | 0.04   | 0.07   | 0.08   | 0.1    | 0.08    | 0.09    | 0.07    | 0.06    | 0.06    | 0.05    | 0.06    | 0.07    | 0.07    | 0.06    |
| Occupational Therapy              | 0      | 0.03   | 0.06   | 0.07   | 0.07   | 0.07   | 0.05   | 0.05   | 0.05   | 0.04    | 0.04    | 0.03    | 0.03    | 0.02    | 0.02    | 0.03    | 0.03    | 0.06    | 0.25    |
| Placebo                           | 0      | 0      | 0      | 0      | 0      | 0      | 0      | 0      | 0      | 0       | 0       | 0.02    | 0.05    | 0.1     | 0.18    | 0.23    | 0.23    | 0.14    | 0.05    |
| Psychoosocial Therapy             | 0      | 0      | 0      | 0      | 0.01   | 0.01   | 0.03   | 0.05   | 0.08   | 0.09    | 0.11    | 0.1     | 0.12    | 0.1     | 0.08    | 0.07    | 0.06    | 0.06    | 0.04    |
| Reminiscence Therapy              | 0      | 0.02   | 0.06   | 0.14   | 0.3    | 0.2    | 0.12   | 0.08   | 0.04   | 0.02    | 0.01    | 0.01    | 0.01    | 0       | 0       | 0       | 0       | 0       | 0       |
| Sertraline                        | 0      | 0      | 0      | 0      | 0      | 0.01   | 0.02   | 0.03   | 0.05   | 0.08    | 0.11    | 0.13    | 0.15    | 0.11    | 0.11    | 0.07    | 0.07    | 0.05    | 0.02    |
| Strength Exercise                 | 0      | 0.11   | 0.42   | 0.15   | 0.07   | 0.05   | 0.03   | 0.02   | 0.02   | 0.01    | 0.01    | 0.01    | 0.01    | 0.01    | 0.01    | 0.01    | 0.01    | 0.02    | 0.03    |
| Tai Chi                           | 0      | 0      | 0      | 0      | 0      | 0.01   | 0.01   | 0.01   | 0.02   | 0.03    | 0.03    | 0.04    | 0.07    | 0.09    | 0.1     | 0.13    | 0.15    | 0.18    | 0.13    |

B. Geriatric Depression Scale

| Drug                          | Rank 1 | Rank 2 | Rank 3 | Rank 4 | Rank 5 | Rank 6 | Rank 7 | Rank 8 | Rank 9 | Rank 10 | Rank 11 | Rank 12 |
|-------------------------------|--------|--------|--------|--------|--------|--------|--------|--------|--------|---------|---------|---------|
| Behavioral Training           | 0      | 0.02   | 0.06   | 0.13   | 0.21   | 0.18   | 0.13   | 0.09   | 0.06   | 0.05    | 0.04    | 0.02    |
| Citalopram                    | 0.01   | 0.03   | 0.08   | 0.1    | 0.12   | 0.13   | 0.12   | 0.09   | 0.07   | 0.08    | 0.09    | 0.08    |
| Cognitive stimulated training | 0      | 0.01   | 0.03   | 0.04   | 0.06   | 0.08   | 0.1    | 0.11   | 0.11   | 0.12    | 0.15    | 0.17    |
| Exercise                      | 0      | 0.01   | 0.03   | 0.05   | 0.07   | 0.09   | 0.11   | 0.1    | 0.1    | 0.12    | 0.14    | 0.17    |
| Hormone Therapy               | 0      | 0.01   | 0.02   | 0.04   | 0.05   | 0.07   | 0.08   | 0.09   | 0.1    | 0.12    | 0.17    | 0.24    |
| Massage                       | 0.02   | 0.07   | 0.21   | 0.21   | 0.14   | 0.1    | 0.07   | 0.05   | 0.04   | 0.03    | 0.03    | 0.02    |
| Multidomain Therapy           | 0.2    | 0.56   | 0.1    | 0.05   | 0.03   | 0.02   | 0.01   | 0.01   | 0.01   | 0.01    | 0       | 0       |
| Music Therapy                 | 0.74   | 0.18   | 0.04   | 0.02   | 0.01   | 0.01   | 0      | 0      | 0      | 0       | 0       | 0       |
| Placebo                       | 0      | 0      | 0      | 0      | 0.01   | 0.03   | 0.1    | 0.22   | 0.29   | 0.23    | 0.1     | 0.02    |
| Psychoosocial Therapy         | 0.01   | 0.02   | 0.04   | 0.06   | 0.09   | 0.12   | 0.12   | 0.11   | 0.1    | 0.1     | 0.12    | 0.12    |
| Reminiscence Therapy          | 0.01   | 0.07   | 0.36   | 0.26   | 0.14   | 0.08   | 0.04   | 0.02   | 0.01   | 0.01    | 0       | 0       |
| Sertraline                    | 0      | 0.01   | 0.03   | 0.05   | 0.07   | 0.09   | 0.1    | 0.11   | 0.1    | 0.13    | 0.15    | 0.16    |

C. Hamilton Depression Rating Scale

| Drug                          | Rank 1 | Rank 2 | Rank 3 | Rank 4 | Rank 5 | Rank 6 | Rank 7 | Rank 8 | Rank 9 | Rank 10 | Rank 11 | Rank 12 |
|-------------------------------|--------|--------|--------|--------|--------|--------|--------|--------|--------|---------|---------|---------|
| Amitriptyline                 | 0      | 0      | 0      | 0      | 0      | 0.01   | 0.01   | 0.01   | 0.01   | 0.02    | 0.05    | 0.88    |
| Behavioral Training           | 0.05   | 0.29   | 0.19   | 0.2    | 0.13   | 0.06   | 0.03   | 0.02   | 0.01   | 0.01    | 0.01    | 0.01    |
| Cognitive stimulated training | 0.04   | 0.15   | 0.19   | 0.24   | 0.2    | 0.08   | 0.04   | 0.02   | 0.01   | 0.01    | 0.01    | 0.01    |
| Exercise                      | 0      | 0.01   | 0.02   | 0.02   | 0.04   | 0.06   | 0.15   | 0.25   | 0.2    | 0.16    | 0.07    | 0.03    |
| Fluoxetine                    | 0      | 0      | 0.01   | 0.01   | 0.02   | 0.02   | 0.04   | 0.06   | 0.07   | 0.14    | 0.6     | 0.01    |
| Hormone Therapy               | 0.01   | 0.02   | 0.04   | 0.06   | 0.08   | 0.14   | 0.3    | 0.09   | 0.1    | 0.11    | 0.05    | 0.01    |
| Imipramine                    | 0      | 0      | 0.01   | 0.01   | 0.02   | 0.04   | 0.07   | 0.12   | 0.18   | 0.38    | 0.15    | 0.03    |
| Music Therapy                 | 0.76   | 0.1    | 0.05   | 0.03   | 0.02   | 0.01   | 0.01   | 0.01   | 0      | 0       | 0       | 0       |
| Placebo                       | 0      | 0      | 0      | 0      | 0.01   | 0.04   | 0.14   | 0.34   | 0.35   | 0.1     | 0.02    | 0       |
| Rivastigmine                  | 0.02   | 0.03   | 0.05   | 0.08   | 0.19   | 0.37   | 0.13   | 0.05   | 0.03   | 0.03    | 0.02    | 0.01    |
| Sertraline                    | 0.04   | 0.23   | 0.31   | 0.2    | 0.11   | 0.05   | 0.03   | 0.01   | 0.01   | 0.01    | 0       | 0       |
| Venlafaxine                   | 0.08   | 0.16   | 0.13   | 0.13   | 0.18   | 0.13   | 0.06   | 0.03   | 0.03   | 0.03    | 0.02    | 0.01    |

D. Mini-Mental State Examination

| Drug                          | Rank 1 | Rank 2 | Rank 3 | Rank 4 | Rank 5 | Rank 6 | Rank 7 | Rank 8 | Rank 9 | Rank 10 | Rank 11 | Rank 12 | Rank 13 | Rank 14 | Rank 15 | Rank 16 | Rank 17 | Rank 18 |
|-------------------------------|--------|--------|--------|--------|--------|--------|--------|--------|--------|---------|---------|---------|---------|---------|---------|---------|---------|---------|
| Amitriptyline                 | 0.03   | 0.06   | 0.06   | 0.08   | 0.08   | 0.08   | 0.08   | 0.07   | 0.06   | 0.05    | 0.05    | 0.05    | 0.05    | 0.05    | 0.04    | 0.04    | 0.03    | 0.03    |
| Aripiprazole                  | 0      | 0.01   | 0.01   | 0.01   | 0.02   | 0.02   | 0.02   | 0.03   | 0.03   | 0.04    | 0.04    | 0.05    | 0.06    | 0.08    | 0.09    | 0.12    | 0.16    | 0.22    |
| Behavioral Training           | 0      | 0.02   | 0.03   | 0.05   | 0.07   | 0.09   | 0.1    | 0.1    | 0.09   | 0.07    | 0.07    | 0.07    | 0.06    | 0.06    | 0.04    | 0.04    | 0.02    | 0.01    |
| Citalopram                    | 0.05   | 0.08   | 0.08   | 0.09   | 0.09   | 0.09   | 0.08   | 0.08   | 0.06   | 0.05    | 0.04    | 0.04    | 0.03    | 0.03    | 0.03    | 0.02    | 0.02    | 0.01    |
| Cognitive stimulated training | 0.09   | 0.23   | 0.22   | 0.16   | 0.11   | 0.07   | 0.05   | 0.03   | 0.02   | 0.01    | 0.01    | 0       | 0       | 0       | 0       | 0       | 0       | 0       |
| Electrical Current Therapy    | 0.58   | 0.14   | 0.08   | 0.05   | 0.04   | 0.03   | 0.02   | 0.01   | 0.01   | 0.01    | 0.01    | 0.01    | 0       | 0       | 0       | 0       | 0       | 0       |
| EGb 761                       | 0.01   | 0.03   | 0.04   | 0.05   | 0.06   | 0.07   | 0.06   | 0.07   | 0.07   | 0.06    | 0.06    | 0.06    | 0.06    | 0.07    | 0.07    | 0.06    | 0.06    | 0.05    |
| Exercise                      | 0.02   | 0.03   | 0.05   | 0.05   | 0.06   | 0.06   | 0.07   | 0.07   | 0.07   | 0.06    | 0.06    | 0.06    | 0.06    | 0.06    | 0.06    | 0.06    | 0.05    | 0.04    |
| Fluoxetine                    | 0      | 0.01   | 0.01   | 0.01   | 0.02   | 0.02   | 0.03   | 0.04   | 0.04   | 0.04    | 0.05    | 0.05    | 0.07    | 0.08    | 0.11    | 0.13    | 0.15    | 0.16    |
| Hormone Therapy               | 0      | 0.01   | 0.02   | 0.03   | 0.04   | 0.06   | 0.07   | 0.07   | 0.07   | 0.07    | 0.07    | 0.07    | 0.08    | 0.08    | 0.08    | 0.07    | 0.05    | 0.04    |
| Imipramine                    | 0      | 0.01   | 0.01   | 0.02   | 0.02   | 0.04   | 0.05   | 0.05   | 0.06   | 0.05    | 0.06    | 0.07    | 0.08    | 0.09    | 0.1     | 0.11    | 0.1     | 0.08    |
| Massage                       | 0.05   | 0.09   | 0.08   | 0.09   | 0.08   | 0.08   | 0.07   | 0.07   | 0.06   | 0.05    | 0.04    | 0.04    | 0.04    | 0.04    | 0.04    | 0.03    | 0.03    | 0.02    |
| Multidomain Therapy           | 0.02   | 0.04   | 0.04   | 0.05   | 0.05   | 0.06   | 0.06   | 0.05   | 0.05   | 0.05    | 0.05    | 0.05    | 0.06    | 0.06    | 0.07    | 0.07    | 0.08    | 0.09    |
| Placebo                       | 0      | 0      | 0      | 0      | 0      | 0      | 0.02   | 0.05   | 0.12   | 0.19    | 0.22    | 0.21    | 0.12    | 0.05    | 0.02    | 0       | 0       | 0       |
| Psychoosocial Therapy         | 0      | 0.01   | 0.01   | 0.02   | 0.03   | 0.04   | 0.05   | 0.06   | 0.07   | 0.07    | 0.08    | 0.09    | 0.1     | 0.11    | 0.09    | 0.08    | 0.06    | 0.03    |
| Reminiscence Therapy          | 0.05   | 0.12   | 0.14   | 0.13   | 0.13   | 0.11   | 0.08   | 0.06   | 0.05   | 0.03    | 0.02    | 0.02    | 0.02    | 0.01    | 0.01    | 0       | 0       | 0       |
| Rivastigmine                  | 0.08   | 0.13   | 0.1    | 0.1    | 0.09   | 0.08   | 0.07   | 0.06   | 0.05   | 0.04    | 0.03    | 0.03    | 0.03    | 0.03    | 0.03    | 0.02    | 0.02    | 0.01    |
| Sertraline                    | 0      | 0      | 0      | 0.01   | 0.01   | 0.01   | 0.02   | 0.03   | 0.03   | 0.03    | 0.04    | 0.05    | 0.06    | 0.08    | 0.11    | 0.13    | 0.17    | 0.21    |

E. Neuropsychiatric Inventory

| Drug                          | Rank 1 | Rank 2 | Rank 3 | Rank 4 | Rank 5 | Rank 6 | Rank 7 | Rank 8 | Rank 9 | Rank 10 | Rank 11 | Rank 12 | Rank 13 |
|-------------------------------|--------|--------|--------|--------|--------|--------|--------|--------|--------|---------|---------|---------|---------|
| Aripiprazole                  | 0.01   | 0.01   | 0.02   | 0.03   | 0.05   | 0.11   | 0.14   | 0.18   | 0.17   | 0.1     | 0.07    | 0.06    | 0.04    |
| Behavioral Training           | 0.17   | 0.24   | 0.26   | 0.15   | 0.08   | 0.04   | 0.02   | 0.01   | 0.01   | 0.01    | 0       | 0       | 0       |
| Citalopram                    | 0.05   | 0.07   | 0.13   | 0.29   | 0.29   | 0.07   | 0.04   | 0.02   | 0.02   | 0.01    | 0.01    | 0.01    | 0       |
| Cognitive stimulated training | 0      | 0      | 0.01   | 0.01   | 0.03   | 0.05   | 0.05   | 0.06   | 0.06   | 0.07    | 0.12    | 0.29    | 0.26    |
| Donepezil                     | 0.51   | 0.18   | 0.13   | 0.06   | 0.04   | 0.02   | 0.02   | 0.01   | 0.01   | 0.01    | 0.01    | 0.01    | 0.01    |
| EGb 761                       | 0.16   | 0.37   | 0.2    | 0.16   | 0.05   | 0.02   | 0.01   | 0.01   | 0.01   | 0.01    | 0       | 0       | 0       |
| Exercise                      | 0      | 0.01   | 0.01   | 0.03   | 0.06   | 0.23   | 0.22   | 0.14   | 0.11   | 0.09    | 0.05    | 0.04    | 0.02    |
| Light therapy                 | 0.01   | 0.01   | 0.02   | 0.02   | 0.04   | 0.05   | 0.06   | 0.05   | 0.05   | 0.07    | 0.1     | 0.13    | 0.4     |
| Multidomain Therapy           | 0      | 0.01   | 0.02   | 0.03   | 0.06   | 0.1    | 0.13   | 0.17   | 0.2    | 0.17    | 0.07    | 0.03    | 0.01    |
| Placebo                       | 0      | 0      | 0      | 0      | 0      | 0.01   | 0.03   | 0.09   | 0.18   | 0.28    | 0.32    | 0.08    | 0.01    |
| Psychoosocial Therapy         | 0.02   | 0.03   | 0.04   | 0.06   | 0.09   | 0.17   | 0.15   | 0.09   | 0.08   | 0.07    | 0.06    | 0.08    | 0.07    |
| Reminiscence Therapy          | 0      | 0      | 0      | 0.01   | 0.02   | 0.03   | 0.06   | 0.13   | 0.09   | 0.1     | 0.16    | 0.25    | 0.15    |
| Sertraline                    | 0.07   | 0.08   | 0.17   | 0.15   | 0.21   | 0.09   | 0.06   | 0.05   | 0.03   | 0.03    | 0.02    | 0.02    | 0.02    |
