# Supplementary material for: Comparative efficacy and acceptability of treatments for depressive symptoms in cognitive impairment: A systematic review and Bayesian network meta-analysis
Source: Frontiers journal article supplement (doi:10.3389/fnagi.2022.1037414), 2022-12-12
Supplement: Data_Sheet_1.zip [file Data_Sheet_1.zip]

| Comparison | Number of studies | Cornell Scale for Depression |                |               |               |               |               | Confidence rating |
|------------|-------------------|------------------------------|----------------|---------------|---------------|---------------|---------------|-------------------|
|            |                   | Within-study bias            | Reporting bias | Indirectness  | Imprecision   | Heterogeneity | Incoherence   |                   |
| AEXE:PLA   | 1                 | Some concerns                | Low risk       | No concerns   | No concerns   | No concerns   | No concerns   | High              |
| AEXE:SEXE  | 1                 | Some concerns                | Low risk       | No concerns   | No concerns   | No concerns   | No concerns   | High              |
| ARI:PLA    | 1                 | Some concerns                | Low risk       | No concerns   | No concerns   | No concerns   | No concerns   | High              |
| BT:PLA     | 6                 | Some concerns                | Low risk       | No concerns   | No concerns   | No concerns   | No concerns   | High              |
| CIT:PLA    | 1                 | Some concerns                | Low risk       | No concerns   | No concerns   | Some concerns | No concerns   | High              |
| CST:EXE    | 1                 | Some concerns                | Low risk       | No concerns   | No concerns   | No concerns   | No concerns   | High              |
| CST:PLA    | 4                 | Some concerns                | Low risk       | No concerns   | No concerns   | No concerns   | No concerns   | High              |
| DIS:PLA    | 1                 | Some concerns                | Low risk       | No concerns   | No concerns   | No concerns   | No concerns   | High              |
| ECT:PLA    | 1                 | Some concerns                | Low risk       | No concerns   | No concerns   | No concerns   | No concerns   | High              |
| EXE:MLT    | 1                 | Some concerns                | Low risk       | No concerns   | No concerns   | No concerns   | No concerns   | High              |
| EXE:PLA    | 1                 | Some concerns                | Low risk       | No concerns   | No concerns   | No concerns   | No concerns   | High              |
| LGT:PLA    | 2                 | Some concerns                | Low risk       | No concerns   | No concerns   | No concerns   | No concerns   | High              |
| MAS:PLA    | 1                 | Some concerns                | Low risk       | No concerns   | No concerns   | No concerns   | No concerns   | High              |
| MIR:PLA    | 5                 | Major concerns               | Low risk       | Some concerns | No concerns   | No concerns   | No concerns   | High              |
| MIR:SER    | 5                 | Major concerns               | Low risk       | Some concerns | No concerns   | No concerns   | Some concerns | High              |
| MLT:PLA    | 5                 | Some concerns                | Low risk       | No concerns   | No concerns   | No concerns   | No concerns   | High              |
| MUT:PLA    | 2                 | Some concerns                | Low risk       | No concerns   | No concerns   | No concerns   | No concerns   | High              |
| OPT:PLA    | 3                 | Some concerns                | Low risk       | No concerns   | No concerns   | No concerns   | No concerns   | High              |
| PLA:PRAT   | 1                 | Some concerns                | Low risk       | No concerns   | Some concerns | No concerns   | No concerns   | High              |
| PLA:PSI    | 1                 | Some concerns                | Low risk       | No concerns   | No concerns   | No concerns   | No concerns   | High              |
| PLA:RET    | 5                 | Some concerns                | Low risk       | No concerns   | No concerns   | No concerns   | No concerns   | High              |
| PLA:SER    | 8                 | Major concerns               | Low risk       | Some concerns | No concerns   | No concerns   | No concerns   | High              |
| PLA:TAI    | 1                 | Some concerns                | Low risk       | No concerns   | No concerns   | No concerns   | No concerns   | High              |
| SER:VEN    | 1                 | Some concerns                | Low risk       | No concerns   | No concerns   | No concerns   | No concerns   | High              |
| AEXE:ARI   | 0                 | Some concerns                | Low risk       | No concerns   | Some concerns | No concerns   | No concerns   | High              |
| AEXE:BT    | 0                 | Some concerns                | Low risk       | No concerns   | Some concerns | No concerns   | No concerns   | High              |
| AEXE:CIT   | 0                 | Some concerns                | Low risk       | No concerns   | Some concerns | No concerns   | No concerns   | High              |
| AEXE:CST   | 0                 | Some concerns                | Low risk       | No concerns   | No concerns   | No concerns   | No concerns   | High              |
| AEXE:DIS   | 0                 | Some concerns                | Low risk       | No concerns   | Some concerns | No concerns   | No concerns   | High              |
| AEXE:ECT   | 0                 | Some concerns                | Low risk       | No concerns   | Some concerns | No concerns   | No concerns   | High              |
| AEXE:EXE   | 0                 | Some concerns                | Low risk       | No concerns   | No concerns   | Some concerns | No concerns   | High              |
| AEXE:LGT   | 0                 | Some concerns                | Low risk       | No concerns   | Some concerns | No concerns   | No concerns   | High              |
| AEXE:MAS   | 0                 | Some concerns                | Low risk       | No concerns   | No concerns   | No concerns   | No concerns   | High              |
| AEXE:MIR   | 0                 | Major concerns               | Low risk       | Some concerns | Some concerns | No concerns   | No concerns   | High              |
| AEXE:MLT   | 0                 | Some concerns                | Low risk       | No concerns   | No concerns   | Some concerns | No concerns   | High              |
| AEXE:MUT   | 0                 | Some concerns                | Low risk       | No concerns   | Some concerns | No concerns   | No concerns   | High              |
| AEXE:OPT   | 0                 | Some concerns                | Low risk       | No concerns   | Some concerns | No concerns   | No concerns   | High              |
| AEXE:PRAT  | 0                 | Some concerns                | Low risk       | No concerns   | Some concerns | No concerns   | No concerns   | High              |
| AEXE:PSI   | 0                 | Some concerns                | Low risk       | No concerns   | Some concerns | No concerns   | No concerns   | High              |
| AEXE:RET   | 0                 | Some concerns                | Low risk       | No concerns   | Some concerns | No concerns   | No concerns   | High              |
| AEXE:SER   | 0                 | Some concerns                | Low risk       | No concerns   | No concerns   | Some concerns | No concerns   | High              |
| AEXE:TAI   | 0                 | Some concerns                | Low risk       | No concerns   | No concerns   | No concerns   | No concerns   | High              |
| AEXE:VEN   | 0                 | Some concerns                | Low risk       | No concerns   | No concerns   | No concerns   | No concerns   | High              |
| ARI:BT     | 0                 | Some concerns                | Low risk       | No concerns   | No concerns   | No concerns   | No concerns   | High              |
| ARI:CIT    | 0                 | Some concerns                | Low risk       | No concerns   | No concerns   | No concerns   | No concerns   | High              |
| ARI:CST    | 0                 | Some concerns                | Low risk       | No concerns   | No concerns   | No concerns   | No concerns   | High              |
| ARI:DIS    | 0                 | Some concerns                | Low risk       | No concerns   | No concerns   | Some concerns | No concerns   | High              |
| ARI:ECT    | 0                 | Some concerns                | Low risk       | No concerns   | Some concerns | No concerns   | No concerns   | High              |
| ARI:EXE    | 0                 | Some concerns                | Low risk       | No concerns   | No concerns   | No concerns   | No concerns   | High              |
| ARI:LGT    | 0                 | Some concerns                | Low risk       | No concerns   | No concerns   | No concerns   | No concerns   | High              |
| ARI:MAS    | 0                 | Some concerns                | Low risk       | No concerns   | No concerns   | No concerns   | No concerns   | High              |
| ARI:MIR    | 0                 | Major concerns               | Low risk       | Some concerns | No concerns   | No concerns   | No concerns   | High              |
| ARI:MLT    | 0                 | Some concerns                | Low risk       | No concerns   | No concerns   | No concerns   | No concerns   | High              |
| ARI:MUT    | 0                 | Some concerns                | Low risk       | No concerns   | No concerns   | No concerns   | No concerns   | High              |
| ARI:OPT    | 0                 | Some concerns                | Low risk       | No concerns   | No concerns   | No concerns   | No concerns   | High              |
| ARI:PRAT   | 0                 | Some concerns                | Low risk       | No concerns   | Some concerns | No concerns   | No concerns   | High              |
| ARI:PSI    | 0                 | Some concerns                | Low risk       | No concerns   | No concerns   | No concerns   | No concerns   | High              |
| ARI:RET    | 0                 | Some concerns                | Low risk       | No concerns   | No concerns   | No concerns   | No concerns   | High              |
| ARI:SER    | 0                 | Some concerns                | Low risk       | No concerns   | No concerns   | No concerns   | No concerns   | High              |
| ARI:SEXE   | 0                 | Some concerns                | Low risk       | No concerns   | Some concerns | No concerns   | No concerns   | High              |
| ARI:TAI    | 0                 | Some concerns                | Low risk       | No concerns   | No concerns   | Some concerns | No concerns   | High              |
| ARI:VEN    | 0                 | Some concerns                | Low risk       | No concerns   | No concerns   | No concerns   | No concerns   | High              |
| BT:CIT     | 0                 | Some concerns                | Low risk       | No concerns   | No concerns   | No concerns   | No concerns   | High              |
| BT:CST     | 0                 | Some concerns                | Low risk       | No concerns   | No concerns   | No concerns   | No concerns   | High              |
| BT:DIS     | 0                 | Some concerns                | Low risk       | No concerns   | No concerns   | No concerns   | No concerns   | High              |
| BT:ECT     | 0                 | Some concerns                | Low risk       | No concerns   | Some concerns | No concerns   | No concerns   | High              |
| BT:EXE     | 0                 | Some concerns                | Low risk       | No concerns   | No concerns   | No concerns   | No concerns   | High              |
| BT:LGT     | 0                 | Some concerns                | Low risk       | No concerns   | No concerns   | No concerns   | No concerns   | High              |
| BT:MAS     | 0                 | Some concerns                | Low risk       | No concerns   | No concerns   | No concerns   | No concerns   | High              |
| BT:MIR     | 0                 | Major concerns               | Low risk       | Some concerns | No concerns   | No concerns   | No concerns   | High              |
| BT:MLT     | 0                 | Some concerns                | Low risk       | No concerns   | No concerns   | No concerns   | No concerns   | High              |
| BT:MUT     | 0                 | Some concerns                | Low risk       | No concerns   | No concerns   | Some concerns | No concerns   | High              |
| BT:OPT     | 0                 | Some concerns                | Low risk       | No concerns   | No concerns   | No concerns   | No concerns   | High              |
| BT:PRAT    | 0                 | Some concerns                | Low risk       | No concerns   | Some concerns | No concerns   | No concerns   | High              |
| BT:PSI     | 0                 | Some concerns                | Low risk       | No concerns   | No concerns   | No concerns   | No concerns   | High              |
| BT:RET     | 0                 | Some concerns                | Low risk       | No concerns   | No concerns   | No concerns   | No concerns   | High              |
| BT:SER     | 0                 | Some concerns                | Low risk       | No concerns   | No concerns   | No concerns   | No concerns   | High              |
| BT:SEXE    | 0                 | Some concerns                | Low risk       | No concerns   | Some concerns | No concerns   | No concerns   | High              |
| BT:TAI     | 0                 | Some concerns                | Low risk       | No concerns   | No concerns   | No concerns   | No concerns   | High              |
| BT:VEN     | 0                 | Some concerns                | Low risk       | No concerns   | No concerns   | No concerns   | No concerns   | High              |
| CIT:CST    | 0                 | Some concerns                | Low risk       | No concerns   | No concerns   | Some concerns | No concerns   | High              |
| CIT:DIS    | 0                 | Some concerns                | Low risk       | No concerns   | No concerns   | Some concerns | No concerns   | High              |
| CIT:ECT    | 0                 | Some concerns                | Low risk       | No concerns   | Some concerns | No concerns   | No concerns   | High              |
| CIT:EXE    | 0                 | Some concerns                | Low risk       | No concerns   | No concerns   | No concerns   | No concerns   | High              |
| CIT:LGT    | 0                 | Some concerns                | Low risk       | No concerns   | No concerns   | No concerns   | No concerns   | High              |
| CIT:MAS    | 0                 | Some concerns                | Low risk       | No concerns   | No concerns   | No concerns   | No concerns   | High              |
| CIT:MIR    | 0                 | Major concerns               | Low risk       | Some concerns | No concerns   | No concerns   | No concerns   | High              |
| CIT:MLT    | 0                 | Some concerns                | Low risk       | No concerns   | No concerns   | No concerns   | No concerns   | High              |
| CIT:MUT    | 0                 | Some concerns                | Low risk       | No concerns   | Some concerns | No concerns   | No concerns   | High              |

[illegible]

[illegible]

[illegible]

[illegible]



[illegible]

|         |   |               |          |             |               |               |                |      |
|---------|---|---------------|----------|-------------|---------------|---------------|----------------|------|
| EXE:RIV | 0 | Some concerns | Low risk | No concerns | No concerns   | No concerns   | Some concerns  | High |
| EXE:SER | 0 | Some concerns | Low risk | No concerns | No concerns   | Some concerns | Some concerns  | High |
| EXE:VEN | 0 | Some concerns | Low risk | No concerns | No concerns   | No concerns   | Some concerns  | High |
| FLU:HMT | 0 | Some concerns | Low risk | No concerns | No concerns   | Some concerns | Some concerns  | High |
| FLU:IMI | 0 | Some concerns | Low risk | No concerns | No concerns   | No concerns   | Some concerns  | High |
| FLU:MLT | 0 | Some concerns | Low risk | No concerns | No concerns   | Some concerns | Some concerns  | High |
| FLU:MUT | 0 | Some concerns | Low risk | No concerns | No concerns   | No concerns   | Some concerns  | High |
| FLU:RIV | 0 | Some concerns | Low risk | No concerns | No concerns   | Some concerns | Some concerns  | High |
| FLU:SER | 0 | Some concerns | Low risk | No concerns | No concerns   | Some concerns | Major concerns | High |
| FLU:VEN | 0 | Some concerns | Low risk | No concerns | No concerns   | Some concerns | Some concerns  | High |
| HMT:IMI | 0 | Some concerns | Low risk | No concerns | No concerns   | No concerns   | Some concerns  | High |
| HMT:MLT | 0 | Some concerns | Low risk | No concerns | No concerns   | No concerns   | Some concerns  | High |
| HMT:MUT | 0 | Some concerns | Low risk | No concerns | No concerns   | Some concerns | Some concerns  | High |
| HMT:RIV | 0 | Some concerns | Low risk | No concerns | No concerns   | No concerns   | Some concerns  | High |
| HMT:SER | 0 | Some concerns | Low risk | No concerns | No concerns   | Some concerns | Some concerns  | High |
| HMT:VEN | 0 | Some concerns | Low risk | No concerns | No concerns   | No concerns   | Major concerns | High |
| IMI:MLT | 0 | Some concerns | Low risk | No concerns | No concerns   | Some concerns | Some concerns  | High |
| IMI:MUT | 0 | Some concerns | Low risk | No concerns | No concerns   | No concerns   | Some concerns  | High |
| IMI:RIV | 0 | Some concerns | Low risk | No concerns | No concerns   | No concerns   | Some concerns  | High |
| IMI:SER | 0 | Some concerns | Low risk | No concerns | No concerns   | Some concerns | Some concerns  | High |
| IMI:VEN | 0 | Some concerns | Low risk | No concerns | No concerns   | Some concerns | Some concerns  | High |
| MLT:MUT | 0 | Some concerns | Low risk | No concerns | Some concerns | No concerns   | Major concerns | High |
| MLT:RIV | 0 | Some concerns | Low risk | No concerns | No concerns   | No concerns   | Some concerns  | High |
| MLT:SER | 0 | Some concerns | Low risk | No concerns | No concerns   | No concerns   | Some concerns  | High |
| MLT:VEN | 0 | Some concerns | Low risk | No concerns | No concerns   | No concerns   | Some concerns  | High |
| MUT:RIV | 0 | Some concerns | Low risk | No concerns | No concerns   | Some concerns | Some concerns  | High |
| MUT:SER | 0 | Some concerns | Low risk | No concerns | No concerns   | Some concerns | Some concerns  | High |
| MUT:VEN | 0 | Some concerns | Low risk | No concerns | Some concerns | No concerns   | Some concerns  | High |
| PLA:VEN | 0 | Some concerns | Low risk | No concerns | No concerns   | No concerns   | Major concerns | High |
| RIV:SER | 0 | Some concerns | Low risk | No concerns | No concerns   | No concerns   | Some concerns  | High |
| RIV:VEN | 0 | Some concerns | Low risk | No concerns | No concerns   | No concerns   | Some concerns  | High |

## Mini-Mental State Examination

[illegible]



[illegible]

[illegible]

[illegible]

[illegible]

| Comparison | Number of studies | Cohen-Mansfeld Agitation Inventory |                |              |             |               |               | Confidence rating |
|------------|-------------------|------------------------------------|----------------|--------------|-------------|---------------|---------------|-------------------|
|            |                   | Within-study bias                  | Reporting bias | Indirectness | Imprecision | Heterogeneity | Incoherence   |                   |
| ARI:PLA    | 2                 | Some concerns                      | Low risk       | No concerns  | No concerns | No concerns   | No concerns   | High              |
| AT:PLA     | 1                 | Some concerns                      | Low risk       | No concerns  | No concerns | No concerns   | No concerns   | High              |
| CIT:PLA    | 1                 | Some concerns                      | Low risk       | No concerns  | No concerns | No concerns   | No concerns   | High              |
| FLU:PLA    | 1                 | Some concerns                      | Low risk       | No concerns  | No concerns | Some concerns | Some concerns | High              |
| LGT:PLA    | 2                 | Some concerns                      | Low risk       | No concerns  | No concerns | No concerns   | No concerns   | High              |
| MAS:PLA    | 2                 | Some concerns                      | Low risk       | No concerns  | No concerns | No concerns   | No concerns   | High              |
| PLA:PRAT   | 1                 | Some concerns                      | Low risk       | No concerns  | No concerns | Some concerns | Some concerns | High              |
| ARI:AT     | 0                 | Some concerns                      | Low risk       | No concerns  | No concerns | No concerns   | Some concerns | High              |
| ARI:CIT    | 0                 | Some concerns                      | Low risk       | No concerns  | No concerns | No concerns   | Some concerns | High              |
| ARI:FLU    | 0                 | Some concerns                      | Low risk       | No concerns  | No concerns | Some concerns | Some concerns | High              |
| ARI:LGT    | 0                 | Some concerns                      | Low risk       | No concerns  | No concerns | No concerns   | Some concerns | High              |
| ARI:MAS    | 0                 | Some concerns                      | Low risk       | No concerns  | No concerns | No concerns   | Some concerns | High              |
| ARI:PRAT   | 0                 | Some concerns                      | Low risk       | No concerns  | No concerns | Some concerns | Some concerns | High              |
| AT:CIT     | 0                 | Some concerns                      | Low risk       | No concerns  | No concerns | No concerns   | Some concerns | High              |
| AT:FLU     | 0                 | Some concerns                      | Low risk       | No concerns  | No concerns | Some concerns | Some concerns | High              |
| AT:LGT     | 0                 | Some concerns                      | Low risk       | No concerns  | No concerns | No concerns   | Some concerns | High              |
| AT:MAS     | 0                 | Some concerns                      | Low risk       | No concerns  | No concerns | No concerns   | Some concerns | High              |
| AT:PRAT    | 0                 | Some concerns                      | Low risk       | No concerns  | No concerns | Some concerns | Some concerns | High              |
| CIT:FLU    | 0                 | Some concerns                      | Low risk       | No concerns  | No concerns | Some concerns | Some concerns | High              |
| CIT:LGT    | 0                 | Some concerns                      | Low risk       | No concerns  | No concerns | No concerns   | Some concerns | High              |
| CIT:MAS    | 0                 | Some concerns                      | Low risk       | No concerns  | No concerns | No concerns   | Some concerns | High              |
| CIT:PRAT   | 0                 | Some concerns                      | Low risk       | No concerns  | No concerns | Some concerns | Some concerns | High              |
| FLU:LGT    | 0                 | Some concerns                      | Low risk       | No concerns  | No concerns | Some concerns | Some concerns | High              |
| FLU:MAS    | 0                 | Some concerns                      | Low risk       | No concerns  | No concerns | Some concerns | Some concerns | High              |
| FLU:PRAT   | 0                 | Some concerns                      | Low risk       | No concerns  | No concerns | Some concerns | Some concerns | High              |
| LGT:MAS    | 0                 | Some concerns                      | Low risk       | No concerns  | No concerns | No concerns   | Some concerns | High              |
| LGT:PRAT   | 0                 | Some concerns                      | Low risk       | No concerns  | No concerns | Some concerns | Some concerns | High              |
| MAS:PRAT   | 0                 | Some concerns                      | Low risk       | No concerns  | No concerns | Some concerns | Some concerns | High              |
