# Supplementary material for: Comparative efficacy and acceptability of treatments for depressive symptoms in cognitive impairment: A systematic review and Bayesian network meta-analysis
Source: Frontiers journal article supplement (doi:10.3389/fnagi.2022.1037414), 2022-12-12
Supplement: Data_Sheet_1.zip [file Data_Sheet_1.zip]

A. Cornell Scale for Depression

|                      |                      |                      |                     |                               |                                   |                            |                     |                     |                         |                     |                     |                      |                      |                            |                      |                     |                     |                      |
|----------------------|----------------------|----------------------|---------------------|-------------------------------|-----------------------------------|----------------------------|---------------------|---------------------|-------------------------|---------------------|---------------------|----------------------|----------------------|----------------------------|----------------------|---------------------|---------------------|----------------------|
| Aerobic Exercise     | 3.36 (-1.62, 7.71)   | 3.84 (-1.03, 7.89)   | 3.98 (-1.20, 8.30)  | 4.88 (0.06, 9.10)             | 4.35 (-0.72, 8.66)                | 1.95 (-3.31, 6.45)         | 4.73 (-0.13, 9.03)  | 4.30 (-0.82, 8.49)  | -7.43 (-12.57, -2.89)   | 4.45 (-0.42, 8.58)  | 4.50 (-0.45, 8.32)  | 4.50 (-1.86, 9.90)   | 5.11 (0.40, 9.17)    | 4.68 (-0.13, 8.72)         | 2.91 (-1.90, 7.45)   | 4.69 (-0.25, 8.74)  | 1.17 (-1.31, 3.80)  | 5.11 (0.17, 9.20)    |
| -3.36 (-7.71, 1.62)  | Aripiprazole         | 0.48 (-1.62, 2.40)   | 0.67 (-2.46, 3.71)  | 1.54 (-0.31, 3.64)            | 0.98 (-1.70, 4.18)                | -1.43 (-4.68, 1.72)        | 1.39 (-0.64, 3.70)  | 0.95 (-1.42, 3.32)  | -10.80 (-13.49, -8.13)  | 1.06 (-1.08, 3.34)  | 1.10 (-1.13, 3.41)  | 0.94 (-3.12, 5.72)   | 1.73 (0.11, 3.58)    | 1.27 (-0.79, 3.47)         | -0.40 (-2.54, 1.91)  | 1.30 (-0.77, 3.43)  | -1.98 (-6.59, 3.36) | 1.71 (-0.41, 4.00)   |
| -3.84 (-7.89, 1.03)  | -0.48 (-2.40, 1.62)  | Behavioral Training  | 0.20 (-2.46, 2.91)  | 1.07 (-0.18, 2.63)            | 0.51 (-1.75, 3.24)                | -1.89 (-4.73, 0.75)        | 0.95 (-0.50, 2.67)  | 0.50 (-1.29, 2.32)  | -11.32 (-13.39, -9.06)  | 0.55 (-0.92, 2.33)  | 0.64 (-1.06, 2.50)  | 0.49 (-3.44, 4.81)   | 1.24 (0.55, 2.34)    | 0.75 (-0.54, 2.50)         | -0.87 (-2.29, 0.90)  | 0.80 (-0.44, 2.30)  | -2.50 (-6.86, 2.77) | 1.21 (-0.23, 3.15)   |
| -3.98 (-8.30, 1.20)  | -0.67 (-2.46, 1.20)  | -0.20 (-2.91, 2.46)  | Citalopram          | 0.90 (-1.89, 3.72)            | 0.33 (-3.04, 3.97)                | -2.11 (-5.67, 1.64)        | 0.76 (-2.07, 3.75)  | 0.28 (-2.66, 3.30)  | -11.47 (-14.67, -8.22)  | 0.49 (-2.47, 3.40)  | 0.32 (-2.42, 3.50)  | 0.31 (-4.17, 5.34)   | 1.08 (-1.39, 3.72)   | 0.64 (-2.19, 3.60)         | -1.05 (-3.86, 1.92)  | 0.67 (-2.18, 3.40)  | -2.70 (-7.66, 2.96) | 1.04 (-1.71, 4.07)   |
| -4.88 (-9.10, -0.06) | -1.54 (-3.64, 0.31)  | -1.07 (-2.63, 0.18)  | -0.90 (-3.72, 1.89) | Cognitive Stimulated Training | -0.50 (-3.12, 2.11)               | -3.02 (-5.79, -0.14)       | -0.12 (-1.34, 0.96) | -0.62 (-2.58, 1.24) | -12.38 (-14.72, -9.95)  | -0.49 (-2.19, 1.24) | -0.49 (-2.25, 1.49) | -0.68 (-4.51, 3.68)  | 0.20 (-0.84, 1.16)   | -0.32 (-1.88, 1.27)        | -1.92 (-3.62, -0.28) | -0.26 (-1.80, 1.14) | -3.50 (-8.13, 1.51) | 0.19 (-1.61, 1.85)   |
| -4.35 (-8.66, 0.72)  | -0.98 (-4.18, 1.70)  | -0.51 (-3.24, 1.75)  | -0.33 (-3.97, 3.04) | 0.50 (-2.11, 3.12)            | Discontinuation of Antipsychotics | -2.46 (-6.00, 0.91)        | 0.36 (-2.24, 3.01)  | -0.07 (-3.07, 2.70) | -11.91 (-15.11, -8.72)  | 0.01 (-2.61, 2.66)  | 0.03 (-2.72, 2.90)  | 0.04 (-4.44, 4.68)   | 0.72 (-1.70, 2.96)   | 0.22 (-2.43, 2.82)         | -1.40 (-4.20, 1.15)  | 0.27 (-2.39, 2.76)  | -3.10 (-8.05, 2.52) | 0.71 (-2.00, 3.35)   |
| -1.95 (-6.45, 3.31)  | 1.43 (-1.72, 4.68)   | 1.89 (-0.75, 4.73)   | 2.11 (-1.64, 5.67)  | 3.02 (0.14, 5.79)             | 2.46 (-0.91, 6.00)                | Electrical Current Therapy | 2.87 (-0.09, 5.72)  | 2.36 (-0.89, 5.53)  | -9.49 (-12.43, -5.78)   | 2.49 (-0.36, 5.62)  | 2.56 (-0.50, 5.99)  | 2.38 (-3.02, 7.28)   | 3.14 (0.61, 5.95)    | 2.60 (0.03, 5.72)          | 1.04 (-2.07, 4.20)   | 2.71 (-0.02, 5.58)  | -0.76 (-5.43, 5.05) | 3.10 (0.31, 6.27)    |
| -4.73 (-9.03, 0.13)  | -1.39 (-3.70, 0.64)  | -0.95 (-2.67, 0.50)  | -0.76 (-3.75, 2.07) | 0.12 (-0.96, 1.34)            | -0.36 (-3.01, 2.24)               | -2.87 (-5.72, 0.09)        | Exercise            | -0.51 (-2.55, 1.54) | -12.25 (-14.65, -9.70)  | -0.37 (-2.19, 1.54) | -0.36 (-2.17, 1.70) | -0.55 (-4.31, 3.86)  | 0.32 (-0.95, 1.55)   | -0.20 (-1.92, 1.58)        | -1.80 (-3.63, 0.01)  | -0.13 (-1.83, 1.46) | -3.36 (-8.00, 1.74) | 0.30 (-1.60, 2.14)   |
| -4.30 (-8.49, 0.82)  | -0.95 (-3.32, 1.42)  | -0.50 (-2.32, 1.29)  | -0.28 (-3.30, 2.66) | 0.62 (-1.24, 2.58)            | 0.07 (-2.70, 3.07)                | -2.36 (-5.53, 0.89)        | 0.51 (-1.54, 2.55)  | Light therapy       | -11.78 (-14.31, -9.07)  | 0.10 (-1.93, 2.29)  | 0.20 (-2.03, 2.41)  | -0.06 (-4.03, 4.58)  | 0.75 (-0.77, 2.48)   | 0.25 (-1.61, 2.41)         | -1.31 (-3.32, 0.87)  | 0.35 (-1.55, 2.28)  | -3.01 (-7.48, 2.64) | 0.74 (-1.26, 2.95)   |
| 7.43 (2.89, 12.57)   | 10.80 (8.13, 13.49)  | 11.32 (9.06, 13.39)  | 11.47 (8.22, 14.67) | 12.38 (9.95, 14.72)           | 11.91 (8.72, 15.11)               | 9.49 (5.78, 12.43)         | 12.25 (9.70, 14.65) | 11.78 (9.07, 14.31) | Massage                 | 11.90 (9.53, 14.32) | 11.95 (9.48, 14.43) | 11.84 (7.34, 16.46)  | 12.58 (10.61, 14.64) | 12.10 (9.85, 14.40)        | 10.46 (8.13, 12.88)  | 12.10 (9.90, 14.41) | 8.74 (4.14, 14.31)  | 12.57 (10.15, 15.04) |
| -4.45 (-8.58, 0.42)  | -1.06 (-3.34, 1.08)  | -0.55 (-2.33, 0.92)  | -0.49 (-3.40, 2.47) | 0.49 (-1.24, 2.19)            | -0.01 (-2.66, 2.61)               | -2.49 (-5.62, 0.36)        | 0.37 (-1.54, 2.19)  | -0.10 (-2.29, 1.93) | -11.90 (-14.32, -9.53)  | Mirtazapine         | 0.01 (-2.14, 2.11)  | -0.08 (-4.11, 4.17)  | 0.68 (-0.75, 1.99)   | 0.18 (-1.66, 2.03)         | -1.42 (-3.36, 0.39)  | 0.21 (-1.18, 1.48)  | -3.13 (-7.61, 2.16) | 0.65 (-1.29, 2.63)   |
| -4.50 (-8.32, 0.45)  | -1.10 (-3.41, 1.13)  | -0.64 (-2.50, 1.06)  | -0.32 (-3.50, 2.42) | 0.49 (-1.49, 2.25)            | -0.03 (-2.90, 2.72)               | -2.56 (-5.99, 0.50)        | 0.36 (-1.70, 2.17)  | -0.20 (-2.41, 2.03) | -11.95 (-14.43, -9.48)  | -0.01 (-2.11, 2.14) | Multidomain Therapy | -0.19 (-4.17, 4.25)  | 0.66 (-0.89, 2.16)   | 0.16 (-1.72, 2.19)         | -1.50 (-3.53, 0.52)  | 0.21 (-1.77, 2.01)  | -3.24 (-7.83, 2.17) | 0.64 (-1.46, 2.69)   |
| -4.50 (-9.90, 1.86)  | -0.94 (-5.72, 3.12)  | -0.49 (-4.81, 3.44)  | -0.31 (-5.34, 4.17) | 0.68 (-3.68, 4.51)            | -0.04 (-4.68, 4.44)               | -2.38 (-7.28, 3.02)        | 0.55 (-3.86, 4.31)  | 0.06 (-4.58, 4.03)  | -11.84 (-16.46, -7.34)  | 0.08 (-4.17, 4.11)  | 0.19 (-4.25, 4.17)  | Occupational Therapy | 0.75 (-3.35, 4.60)   | 0.26 (-4.05, 4.45)         | -1.33 (-5.62, 2.75)  | 0.31 (-3.95, 4.24)  | -3.25 (-9.08, 3.55) | 0.74 (-3.66, 4.82)   |
| -5.11 (-9.17, -0.40) | -1.73 (-3.58, -0.11) | -1.24 (-2.34, -0.55) | -1.08 (-3.72, 1.39) | -0.20 (-1.16, 0.84)           | -0.72 (-2.96, 1.70)               | -3.14 (-5.95, -0.61)       | -0.32 (-1.55, 0.95) | -0.75 (-2.48, 0.77) | -12.58 (-14.64, -10.61) | -0.68 (-1.99, 0.75) | -0.66 (-2.16, 0.89) | -0.75 (-4.60, 3.35)  | Placebo              | -0.51 (-1.68, 0.78)        | -2.11 (-3.46, -0.80) | -0.44 (-1.56, 0.61) | -3.75 (-8.06, 1.30) | -0.02 (-1.46, 1.43)  |
| -4.68 (-8.72, 0.13)  | -1.27 (-3.47, 0.79)  | -0.75 (-2.50, 0.54)  | -0.64 (-3.60, 2.19) | 0.32 (-1.27, 1.88)            | -0.22 (-2.82, 2.43)               | -2.60 (-5.72, -0.03)       | 0.20 (-1.58, 1.92)  | -0.25 (-2.41, 1.61) | -12.10 (-14.40, -9.85)  | -0.18 (-2.03, 1.66) | -0.16 (-2.19, 1.72) | -0.26 (-4.45, 4.05)  | 0.51 (-0.78, 1.68)   | Pet/Robot-Assisted Therapy | -1.60 (-3.45, 0.08)  | 0.09 (-1.64, 1.59)  | -3.33 (-7.73, 1.94) | 0.50 (-1.43, 2.28)   |
| -2.91 (-7.45, 1.90)  | 0.40 (-1.91, 2.54)   | 0.87 (-0.90, 2.29)   | 1.05 (-1.92, 3.86)  | 1.92 (0.28, 3.62)             | 1.40 (-1.15, 4.20)                | -1.04 (-4.20, 2.07)        | 1.80 (-0.01, 3.63)  | 1.31 (-0.87, 3.32)  | -10.46 (-12.88, -8.13)  | 1.42 (-0.39, 3.36)  | 1.50 (-0.52, 3.53)  | 1.33 (-2.75, 5.62)   | 2.11 (0.80, 3.46)    | 1.60 (-0.08, 3.45)         | Reminiscence Therapy | 1.65 (-0.01, 3.28)  | -1.67 (-6.16, 3.65) | 2.08 (0.21, 4.07)    |
| -4.69 (-8.74, 0.25)  | -1.30 (-3.43, 0.77)  | -0.80 (-2.30, 0.44)  | -0.67 (-3.40, 2.18) | 0.26 (-1.14, 1.80)            | -0.27 (-2.76, 2.39)               | -2.71 (-5.58, 0.02)        | 0.13 (-1.46, 1.83)  | -0.35 (-2.28, 1.55) | -12.10 (-14.41, -9.90)  | -0.21 (-1.48, 1.18) | -0.21 (-2.01, 1.77) | -0.31 (-4.24, 3.95)  | 0.44 (-0.61, 1.56)   | -0.09 (-1.59, 1.64)        | -1.65 (-3.28, 0.01)  | Sertraline          | -3.35 (-7.73, 1.97) | 0.41 (-1.30, 2.30)   |
| -1.17 (-3.80, 1.31)  | 1.98 (-3.36, 6.59)   | 2.50 (-2.77, 6.86)   | 2.70 (-2.96, 7.66)  | 3.50 (-1.51, 8.13)            | 3.10 (-2.52, 8.05)                | 0.76 (-5.05, 5.43)         | 3.36 (-1.74, 8.00)  | 3.01 (-2.64, 7.48)  | -8.74 (-14.31, -4.14)   | 3.13 (-2.16, 7.61)  | 3.24 (-2.17, 7.83)  | 3.25 (-3.55, 9.08)   | 3.75 (-1.30, 8.06)   | 3.33 (-1.94, 7.73)         | 1.67 (-3.65, 6.16)   | 3.35 (-1.97, 7.73)  | Strength Exercise   | 3.76 (-1.61, 8.23)   |
| -5.11 (-9.20, -0.17) | -1.71 (-4.00, 0.41)  | -1.21 (-3.15, 0.23)  | -1.04 (-4.07, 1.71) | -0.19 (-1.85, 1.61)           | -0.71 (-3.35, 2.00)               | -3.10 (-6.27, -0.31)       | -0.30 (-2.14, 1.60) | -0.74 (-2.95, 1.26) | -12.57 (-15.04, -10.15) | -0.65 (-2.63, 1.29) | -0.64 (-2.69, 1.46) | -0.74 (-4.82, 3.66)  | 0.02 (-1.43, 1.46)   | -0.50 (-2.28, 1.43)        | -2.08 (-4.07, -0.21) | -0.41 (-2.30, 1.30) | -3.76 (-8.23, 1.61) | Tai Chi              |

B. Geriatric Depression Scale

|                     |                     |                               |                     |                     |                     |                      |                       |                     |                            |                      |                     |
|---------------------|---------------------|-------------------------------|---------------------|---------------------|---------------------|----------------------|-----------------------|---------------------|----------------------------|----------------------|---------------------|
| Behavioral Training | 0.42 (-5.16, 5.99)  | 1.29 (-4.14, 6.72)            | 1.23 (-4.21, 6.57)  | 1.54 (-3.91, 6.77)  | -0.75 (-6.31, 4.74) | -3.87 (-9.46, 1.87)  | -6.19 (-12.49, -0.10) | 1.27 (-2.01, 4.37)  | 0.86 (-4.49, 6.29)         | -1.35 (-5.17, 2.45)  | 1.23 (-4.27, 6.62)  |
| -0.42 (-5.99, 5.16) | Citalopram          | 0.84 (-5.38, 7.08)            | 0.80 (-5.54, 7.21)  | 1.13 (-5.11, 7.38)  | -1.17 (-7.57, 5.21) | -4.25 (-10.78, 2.39) | -6.58 (-13.87, 0.40)  | 0.83 (-3.73, 5.45)  | 0.45 (-5.75, 6.85)         | -1.74 (-6.78, 3.42)  | 0.80 (-5.55, 7.19)  |
| -1.29 (-6.72, 4.14) | -0.84 (-7.08, 5.38) | Cognitive Stimulated Training | -0.06 (-6.10, 6.14) | 0.28 (-6.04, 6.33)  | -2.04 (-8.32, 4.33) | -5.15 (-11.44, 1.31) | -7.50 (-14.45, -0.72) | 0.01 (-4.34, 4.34)  | -0.42 (-6.58, 5.80)        | -2.61 (-7.50, 2.30)  | -0.06 (-6.36, 6.33) |
| -1.23 (-6.57, 4.21) | -0.80 (-7.21, 5.54) | 0.06 (-6.14, 6.10)            | Exercise            | 0.31 (-5.95, 6.25)  | -1.97 (-8.27, 4.21) | -5.10 (-11.42, 1.29) | -7.44 (-14.40, -0.54) | 0.04 (-4.45, 4.34)  | -0.34 (-6.49, 5.70)        | -2.58 (-7.45, 2.34)  | -0.02 (-6.10, 6.27) |
| -1.54 (-6.77, 3.91) | -1.13 (-7.38, 5.11) | -0.28 (-6.33, 6.04)           | -0.31 (-6.25, 5.95) | Hormone Therapy     | -2.32 (-8.43, 4.07) | -5.39 (-11.66, 0.96) | -7.73 (-14.60, -0.90) | -0.29 (-4.51, 4.12) | -0.68 (-6.82, 5.51)        | -2.88 (-7.57, 2.10)  | -0.32 (-6.37, 5.96) |
| 0.75 (-4.74, 6.31)  | 1.17 (-5.21, 7.57)  | 2.04 (-4.33, 8.32)            | 1.97 (-4.21, 8.27)  | 2.32 (-4.07, 8.43)  | Multidomain Therapy | -3.14 (-9.47, 3.49)  | -5.44 (-12.40, 1.51)  | 2.02 (-2.46, 6.51)  | 1.63 (-4.48, 7.92)         | -0.57 (-5.55, 4.53)  | 1.99 (-4.17, 8.40)  |
| 3.87 (-1.87, 9.46)  | 4.25 (-2.39, 10.78) | 5.15 (-1.31, 11.44)           | 5.10 (-1.29, 11.42) | 5.39 (-0.96, 11.66) | 3.14 (-3.49, 9.47)  | Multidomain Therapy  | -2.31 (-9.53, 4.77)   | 5.13 (0.36, 9.72)   | 4.74 (-1.62, 11.13)        | 2.54 (-2.60, 7.64)   | 5.06 (-1.35, 11.49) |
| 6.19 (0.10, 12.49)  | 6.58 (-0.40, 13.87) | 7.50 (0.72, 14.45)            | 7.44 (0.54, 14.40)  | 7.73 (0.90, 14.60)  | 5.44 (-1.51, 12.40) | 2.31 (-4.77, 9.53)   | Music Therapy         | 7.47 (2.06, 12.88)  | 7.10 (0.13, 14.08)         | 4.88 (-0.88, 10.85)  | 7.41 (0.60, 14.53)  |
| -1.27 (-4.37, 2.01) | -0.83 (-5.45, 3.73) | -0.01 (-4.34, 4.34)           | -0.04 (-4.34, 4.45) | 0.29 (-4.12, 4.51)  | -2.02 (-6.51, 2.46) | -5.13 (-9.72, -0.36) | -7.47 (-12.88, -2.06) | Placebo             | -0.39 (-4.72, 4.00)        | -2.58 (-4.72, -0.33) | -0.04 (-4.37, 4.34) |
| -0.86 (-6.29, 4.49) | -0.45 (-6.85, 5.75) | 0.42 (-5.80, 6.58)            | 0.34 (-5.70, 6.49)  | 0.68 (-5.51, 6.82)  | -1.63 (-7.92, 4.48) | -4.74 (-11.13, 1.62) | -7.10 (-14.08, -0.13) | 0.39 (-4.00, 4.72)  | Pet/Robot-Assisted Therapy | -2.22 (-6.98, 2.67)  | 0.34 (-5.86, 6.63)  |
| 1.35 (-2.45, 5.17)  | 1.74 (-3.42, 6.78)  | 2.61 (-2.30, 7.50)            | 2.58 (-2.34, 7.45)  | 2.88 (-2.10, 7.57)  | 0.57 (-4.53, 5.55)  | -2.54 (-7.64, 2.60)  | -4.88 (-10.85, 0.88)  | 2.58 (0.33, 4.72)   | 2.22 (-2.67, 6.98)         | Reminiscence Therapy | 2.55 (-2.38, 7.47)  |
| -1.23 (-6.62, 4.27) | -0.80 (-7.19, 5.55) | 0.06 (-6.33, 6.36)            | 0.02 (-6.27, 6.10)  | 0.32 (-5.96, 6.37)  | -1.99 (-8.40, 4.17) | -5.06 (-11.49, 1.35) | -7.41 (-14.53, -0.60) | 0.04 (-4.34, 4.37)  | -0.34 (-6.63, 5.86)        | -2.55 (-7.47, 2.38)  | Sertraline          |

## C. Hamilton Depression Rating Scale

|                      |                       |                               |                      |                      |                      |                      |                        |                      |                       |                        |                       |
|----------------------|-----------------------|-------------------------------|----------------------|----------------------|----------------------|----------------------|------------------------|----------------------|-----------------------|------------------------|-----------------------|
| Amitriptyline        | -14.30 (-27.25, 0.11) | -13.37 (-26.62, -0.42)        | -8.29 (-21.13, 4.30) | -5.62 (-12.59, 1.63) | -9.52 (-24.13, 2.28) | -7.51 (-19.34, 4.60) | -19.42 (-32.17, -5.82) | -8.25 (-18.63, 2.53) | -11.13 (-24.56, 1.19) | -14.28 (-26.48, -2.44) | -13.17 (-27.87, 0.84) |
| 14.30 (-0.11, 27.25) | Behavioral Training   | 0.84 (-11.28, 10.85)          | 5.77 (-5.92, 15.73)  | 8.66 (-3.03, 19.33)  | 4.44 (-7.71, 13.94)  | 6.57 (-3.39, 15.38)  | -5.07 (-16.64, 5.77)   | 5.73 (-2.50, 13.00)  | 2.85 (-8.64, 12.74)   | -0.07 (-11.00, 9.41)   | 1.19 (-12.66, 13.17)  |
| 13.37 (0.42, 26.62)  | -0.84 (-10.85, 11.28) | Cognitive Stimulated Training | 4.83 (-5.38, 15.86)  | 7.88 (-2.91, 19.11)  | 3.67 (-7.35, 13.94)  | 5.69 (-3.14, 15.32)  | -5.93 (-16.28, 5.09)   | 4.85 (-2.30, 12.76)  | 2.01 (-8.16, 12.67)   | -0.86 (-10.51, 9.19)   | 0.61 (-12.29, 12.54)  |
| 8.29 (-4.30, 21.13)  | -5.77 (-15.73, 5.92)  | -4.83 (-15.86, 5.38)          | Exercise             | 2.78 (-7.70, 13.71)  | -1.23 (-12.35, 8.58) | 0.86 (-8.30, 10.22)  | -10.79 (-21.81, 0.72)  | 0.04 (-7.21, 7.62)   | -2.83 (-13.49, 7.42)  | -5.74 (-15.01, 3.52)   | -4.39 (-16.77, 7.35)  |
| 5.62 (-1.63, 12.59)  | -8.66 (-19.33, 3.03)  | -7.88 (-19.11, 2.91)          | -2.78 (-13.71, 7.70) | Fluoxetine           | -4.09 (-16.67, 5.68) | -1.96 (-11.55, 7.36) | -13.86 (-25.30, -2.38) | -2.80 (-10.47, 5.19) | -5.66 (-16.79, 4.65)  | -8.77 (-19.06, 1.21)   | -7.65 (-20.91, 4.64)  |
| 9.52 (-2.28, 24.13)  | -4.44 (-13.94, 7.71)  | -3.67 (-13.94, 7.35)          | 1.23 (-8.58, 12.35)  | 4.09 (-5.68, 16.67)  | Hormone Therapy      | 2.10 (-6.04, 12.30)  | -9.57 (-20.21, 2.59)   | 1.23 (-5.36, 9.88)   | -1.63 (-10.99, 9.58)  | -4.50 (-14.05, 5.91)   | -3.18 (-15.27, 9.36)  |
| 7.51 (-4.60, 19.34)  | -6.57 (-15.38, 3.39)  | -5.69 (-15.32, 3.14)          | -0.86 (-10.22, 8.30) | 1.96 (-7.36, 11.55)  | -2.10 (-12.30, 6.04) | Imipramine           | -11.61 (-21.84, -1.83) | -0.85 (-6.17, 4.60)  | -3.70 (-12.73, 4.94)  | -6.53 (-15.33, 1.53)   | -5.26 (-16.84, 5.35)  |
| 19.42 (5.82, 32.17)  | 5.07 (-5.77, 16.64)   | 5.93 (-5.09, 16.28)           | 10.79 (-0.72, 21.81) | 13.86 (2.38, 25.30)  | 9.57 (-2.59, 20.21)  | 11.61 (1.83, 21.84)  | Music Therapy          | 10.83 (2.95, 19.85)  | 7.91 (-3.39, 18.81)   | 4.99 (-5.66, 15.31)    | 6.41 (-7.12, 18.90)   |
| 8.25 (-2.53, 18.63)  | -5.73 (-13.00, 2.50)  | -4.85 (-12.76, 2.30)          | -0.04 (-7.62, 7.21)  | 2.80 (-5.19, 10.47)  | -1.23 (-9.88, 5.36)  | 0.85 (-4.60, 6.17)   | -10.83 (-19.85, -2.95) | Placebo              | -2.86 (-10.62, 4.05)  | -5.74 (-12.46, 0.38)   | -4.49 (-14.94, 4.92)  |
| 11.13 (-1.19, 24.56) | -2.85 (-12.74, 8.64)  | -2.01 (-12.67, 8.16)          | 2.83 (-7.42, 13.49)  | 5.66 (-4.65, 16.79)  | 1.63 (-9.58, 10.99)  | 3.70 (-4.94, 12.73)  | -7.91 (-18.81, 3.39)   | 2.86 (-4.05, 10.62)  | Rivastigmine          | -2.90 (-12.90, 6.86)   | -1.55 (-14.31, 10.29) |
| 14.28 (2.44, 26.48)  | 0.07 (-9.41, 11.00)   | 0.86 (-9.19, 10.51)           | 5.74 (-3.52, 15.01)  | 8.77 (-1.21, 19.06)  | 4.50 (-5.91, 14.05)  | 6.53 (-1.53, 15.33)  | -4.99 (-15.31, 5.66)   | 5.74 (-0.38, 12.46)  | 2.90 (-6.86, 12.90)   | Sertraline             | 1.29 (-6.58, 8.90)    |
| 13.17 (-0.84, 27.87) | -1.19 (-13.17, 12.66) | -0.61 (-12.54, 12.29)         | 4.39 (-7.35, 16.77)  | 7.65 (-4.64, 20.91)  | 3.18 (-9.36, 15.27)  | 5.26 (-5.35, 16.84)  | -6.41 (-18.90, 7.12)   | 4.49 (-4.92, 14.94)  | 1.55 (-10.29, 14.31)  | -1.29 (-8.90, 6.58)    | Venlafaxine           |

D. Mini-Mental State Examination

|                     |                      |                     |                     |                               |                            |                     |                     |                      |                     |                     |                     |                     |                      |                       |                      |                     |                       |
|---------------------|----------------------|---------------------|---------------------|-------------------------------|----------------------------|---------------------|---------------------|----------------------|---------------------|---------------------|---------------------|---------------------|----------------------|-----------------------|----------------------|---------------------|-----------------------|
| Amitriptyline       | -2.13 (-7.22, 2.91)  | -0.30 (-4.88, 3.89) | 0.42 (-4.79, 5.47)  | 1.72 (-2.46, 5.95)            | 3.31 (-2.31, 8.81)         | -0.63 (-5.82, 4.48) | -0.50 (-5.60, 4.72) | -1.92 (-6.92, 3.03)  | -0.81 (-5.55, 3.86) | -1.39 (-6.03, 3.38) | 0.33 (-5.00, 5.76)  | -0.80 (-6.27, 4.87) | -0.81 (-4.47, 2.95)  | -1.06 (-5.55, 3.47)   | 1.05 (-3.54, 5.62)   | 0.82 (-4.49, 6.11)  | -2.23 (-6.95, 2.50)   |
| 2.13 (-2.91, 7.22)  | Aripiprazole         | 1.86 (-2.55, 5.97)  | 2.58 (-2.56, 7.74)  | 3.91 (-0.16, 7.90)            | 5.44 (-0.01, 10.73)        | 1.52 (-3.48, 6.45)  | 1.67 (-3.43, 6.74)  | 0.22 (-4.53, 4.99)   | 1.35 (-3.24, 5.90)  | 0.76 (-3.72, 5.32)  | 2.45 (-2.90, 7.85)  | 1.36 (-4.16, 6.76)  | 1.38 (-2.19, 4.88)   | 1.09 (-3.36, 5.53)    | 3.19 (-1.26, 7.67)   | 3.00 (-2.32, 8.02)  | -0.10 (-4.71, 4.50)   |
| 0.30 (-3.89, 4.88)  | -1.86 (-5.97, 2.55)  | Behavioral Training | 0.72 (-3.39, 5.26)  | 2.02 (-1.00, 5.34)            | 3.62 (-1.08, 8.56)         | -0.32 (-4.56, 4.18) | -0.20 (-4.32, 4.29) | -1.61 (-5.40, 2.50)  | -0.51 (-4.15, 3.44) | -1.04 (-4.81, 2.83) | 0.63 (-3.73, 5.34)  | -0.51 (-5.13, 4.48) | -0.47 (-2.78, 2.09)  | -0.73 (-4.06, 2.92)   | 1.34 (-2.15, 5.13)   | 1.16 (-3.25, 5.69)  | -1.93 (-5.56, 1.91)   |
| -0.42 (-5.47, 4.79) | -2.58 (-7.74, 2.56)  | -0.72 (-5.26, 3.39) | Citalopram          | 1.31 (-2.82, 5.40)            | 2.88 (-2.53, 8.30)         | -1.02 (-6.08, 3.95) | -0.95 (-5.89, 4.26) | -2.34 (-7.09, 2.54)  | -1.25 (-5.93, 3.38) | -1.84 (-6.44, 2.91) | -0.09 (-5.39, 5.10) | -1.23 (-6.74, 4.51) | -1.20 (-4.78, 2.44)  | -1.48 (-5.95, 2.95)   | 0.63 (-3.90, 5.15)   | 0.43 (-4.79, 5.62)  | -2.67 (-7.23, 1.93)   |
| -1.72 (-5.95, 2.46) | -3.91 (-7.90, 0.16)  | -2.02 (-5.34, 1.00) | -1.31 (-5.40, 2.82) | Cognitive Stimulated Training | 1.56 (-3.09, 6.19)         | -2.36 (-6.45, 1.73) | -2.21 (-6.29, 1.95) | -3.63 (-7.38, 0.21)  | -2.54 (-6.09, 0.97) | -3.10 (-6.60, 0.45) | -1.40 (-5.71, 2.97) | -2.53 (-7.18, 2.19) | -2.51 (-4.53, -0.53) | -2.78 (-6.07, 0.60)   | -0.68 (-4.03, 2.63)  | -0.89 (-5.20, 3.32) | -3.99 (-7.47, -0.45)  |
| -3.31 (-8.81, 2.31) | -5.44 (-10.73, 0.01) | -3.62 (-8.56, 1.08) | -2.88 (-8.30, 2.53) | -1.56 (-6.19, 3.09)           | Electrical Current Therapy | -3.91 (-9.29, 1.43) | -3.78 (-9.15, 1.69) | -5.23 (-10.36, 0.09) | -4.12 (-9.29, 1.02) | -4.62 (-9.79, 0.44) | -2.97 (-8.63, 2.73) | -4.06 (-9.95, 1.73) | -4.08 (-8.18, 0.08)  | -4.36 (-9.15, 0.55)   | -2.25 (-7.13, 2.71)  | -2.46 (-8.09, 3.04) | -5.52 (-10.55, -0.58) |
| 0.63 (-4.48, 5.82)  | -1.52 (-6.45, 3.48)  | 0.32 (-4.18, 4.56)  | 1.02 (-3.95, 6.08)  | 2.36 (-1.73, 6.45)            | 3.91 (-1.43, 9.29)         | EGb 761             | 0.15 (-4.96, 5.19)  | -1.28 (-5.87, 3.64)  | -0.16 (-4.80, 4.39) | -0.75 (-5.31, 3.96) | 0.95 (-4.35, 6.21)  | -0.18 (-5.71, 5.41) | -0.15 (-3.80, 3.44)  | -0.41 (-4.81, 4.04)   | 1.69 (-2.90, 6.27)   | 1.45 (-3.86, 6.73)  | -1.63 (-6.08, 3.05)   |
| 0.50 (-4.72, 5.60)  | -1.67 (-6.74, 3.43)  | 0.20 (-4.29, 4.32)  | 0.95 (-4.26, 5.89)  | 2.21 (-1.95, 6.29)            | 3.78 (-1.69, 9.15)         | -0.15 (-5.19, 4.96) | Exercise            | -1.43 (-6.16, 3.41)  | -0.32 (-5.01, 4.20) | -0.92 (-5.52, 3.72) | 0.81 (-4.48, 6.03)  | -0.30 (-5.92, 5.32) | -0.30 (-3.90, 3.35)  | -0.55 (-5.02, 3.93)   | 1.57 (-2.98, 5.98)   | 1.29 (-4.08, 6.57)  | -1.75 (-6.38, 2.94)   |
| 1.92 (-3.03, 6.92)  | -0.22 (-4.99, 4.53)  | 1.61 (-2.50, 5.40)  | 2.34 (-2.54, 7.09)  | 3.63 (-0.21, 7.38)            | 5.23 (-0.09, 10.36)        | 1.28 (-3.64, 5.87)  | 1.43 (-3.41, 6.16)  | Fluoxetine           | 1.11 (-3.21, 5.32)  | 0.54 (-3.74, 4.75)  | 2.25 (-2.74, 7.11)  | 1.09 (-4.26, 6.48)  | 1.14 (-2.11, 4.25)   | 0.86 (-3.28, 4.88)    | 2.96 (-1.27, 7.11)   | 2.74 (-2.21, 7.48)  | -0.33 (-4.64, 3.98)   |
| 0.81 (-3.86, 5.55)  | -1.35 (-5.90, 3.24)  | 0.51 (-3.44, 4.15)  | 1.25 (-3.38, 5.93)  | 2.54 (-0.97, 6.09)            | 4.12 (-1.02, 9.29)         | 0.16 (-4.39, 4.80)  | 0.32 (-4.20, 5.01)  | -1.11 (-5.32, 3.21)  | Hormone Therapy     | -0.56 (-4.66, 3.53) | 1.14 (-3.67, 6.06)  | -0.01 (-4.98, 5.10) | 0.02 (-2.87, 2.90)   | -0.22 (-4.24, 3.61)   | 1.88 (-2.03, 5.78)   | 1.65 (-3.07, 6.31)  | -1.44 (-5.60, 2.76)   |
| 1.39 (-3.38, 6.03)  | -0.76 (-5.32, 3.72)  | 1.04 (-2.83, 4.81)  | 1.84 (-2.91, 6.44)  | 3.10 (-0.45, 6.60)            | 4.62 (-0.44, 9.79)         | 0.75 (-3.96, 5.31)  | 0.92 (-3.72, 5.52)  | -0.54 (-4.75, 3.74)  | 0.56 (-3.53, 4.66)  | Imipramine          | 1.70 (-3.05, 6.64)  | 0.58 (-4.44, 5.67)  | 0.59 (-2.31, 3.49)   | 0.34 (-3.65, 4.21)    | 2.43 (-1.50, 6.33)   | 2.21 (-2.70, 6.89)  | -0.87 (-4.94, 3.26)   |
| -0.33 (-5.76, 5.00) | -2.45 (-7.85, 2.90)  | -0.63 (-5.34, 3.73) | 0.09 (-5.10, 5.39)  | 1.40 (-2.97, 5.71)            | 2.97 (-2.73, 8.63)         | -0.95 (-6.21, 4.35) | -0.81 (-6.03, 4.48) | -2.25 (-7.11, 2.74)  | -1.14 (-6.06, 3.67) | -1.70 (-6.64, 3.05) | Massage             | -1.12 (-6.84, 4.65) | -1.09 (-5.02, 2.68)  | -1.39 (-6.00, 3.32)   | 0.74 (-3.84, 5.40)   | 0.52 (-4.96, 5.87)  | -2.55 (-7.36, 2.19)   |
| 0.80 (-4.87, 6.27)  | -1.36 (-6.76, 4.16)  | 0.51 (-4.48, 5.13)  | 1.23 (-4.51, 6.74)  | 2.53 (-2.19, 7.18)            | 4.06 (-1.73, 9.95)         | 0.18 (-5.41, 5.71)  | 0.30 (-5.32, 5.92)  | -1.09 (-6.48, 4.26)  | 0.01 (-5.10, 4.98)  | -0.58 (-5.67, 4.44) | 1.12 (-4.65, 6.84)  | Multidomain Therapy | 0.02 (-4.28, 4.18)   | -0.23 (-5.30, 4.58)   | 1.84 (-3.20, 6.77)   | 1.64 (-4.08, 7.25)  | -1.45 (-6.58, 3.67)   |
| 0.81 (-2.95, 4.47)  | -1.38 (-4.88, 2.19)  | 0.47 (-2.09, 2.78)  | 1.20 (-2.44, 4.78)  | 2.51 (0.53, 4.53)             | 4.08 (-0.08, 8.18)         | 0.15 (-3.44, 3.80)  | 0.30 (-3.35, 3.90)  | -1.14 (-4.25, 2.11)  | -0.02 (-2.90, 2.87) | -0.59 (-3.49, 2.31) | 1.09 (-2.68, 5.02)  | -0.02 (-4.18, 4.28) | Placebo              | -0.27 (-2.84, 2.28)   | 1.83 (-0.85, 4.55)   | 1.62 (-2.16, 5.33)  | -1.47 (-4.33, 1.47)   |
| 1.06 (-3.47, 5.55)  | -1.09 (-5.53, 3.36)  | 0.73 (-2.92, 4.06)  | 1.48 (-2.95, 5.95)  | 2.78 (-0.60, 6.07)            | 4.36 (-0.55, 9.15)         | 0.41 (-4.04, 4.81)  | 0.55 (-3.93, 5.02)  | -0.86 (-4.88, 3.28)  | 0.22 (-3.61, 4.24)  | -0.34 (-4.21, 3.65) | 1.39 (-3.32, 6.00)  | 0.23 (-4.58, 5.30)  | 0.27 (-2.28, 2.84)   | Psychoisoical Therapy | 2.12 (-1.65, 5.76)   | 1.91 (-2.74, 6.43)  | -1.21 (-5.00, 2.68)   |
| -1.05 (-5.62, 3.54) | -3.19 (-7.67, 1.26)  | -1.34 (-5.13, 2.15) | -0.63 (-5.15, 3.90) | 0.68 (-2.63, 4.03)            | 2.25 (-2.71, 7.13)         | -1.69 (-6.27, 2.90) | -1.57 (-5.98, 2.98) | -2.96 (-7.11, 1.27)  | -1.88 (-5.78, 2.03) | -2.43 (-6.33, 1.50) | -0.74 (-5.40, 3.84) | -1.84 (-6.77, 3.20) | -1.83 (-4.55, 0.85)  | -2.12 (-5.76, 1.65)   | Reminiscence Therapy | -0.24 (-4.89, 4.41) | -3.29 (-7.23, 0.68)   |
| -0.82 (-6.11, 4.49) | -3.00 (-8.02, 2.32)  | -1.16 (-5.69, 3.25) | -0.43 (-5.62, 4.79) | 0.89 (-3.32, 5.20)            | 2.46 (-3.04, 8.09)         | -1.45 (-6.73, 3.86) | -1.29 (-6.57, 4.08) | -2.74 (-7.48, 2.21)  | -1.65 (-6.31, 3.07) | -2.21 (-6.89, 2.70) | -0.52 (-5.87, 4.96) | -1.64 (-7.25, 4.08) | -1.62 (-5.33, 2.16)  | -1.91 (-6.43, 2.74)   | 0.24 (-4.41, 4.89)   | Rivastigmine        | -3.09 (-7.77, 1.74)   |
| 2.23 (-2.50, 6.95)  | 0.10 (-4.50, 4.71)   | 1.93 (-1.91, 5.56)  | 2.67 (-1.93, 7.23)  | 3.99 (0.45, 7.47)             | 5.52 (0.58, 10.55)         | 1.63 (-3.05, 6.08)  | 1.75 (-2.94, 6.38)  | 0.33 (-3.98, 4.64)   | 1.44 (-2.76, 5.60)  | 0.87 (-3.26, 4.94)  | 2.55 (-2.19, 7.36)  | 1.45 (-3.67, 6.58)  | 1.47 (-1.47, 4.33)   | 1.21 (-2.68, 5.00)    | 3.29 (-0.68, 7.23)   | 3.09 (-1.74, 7.77)  | Sertraline            |

## E. Neuropsychiatric Inventory

|                      |                       |                       |                               |                       |                       |                      |                      |                      |                      |                       |                       |                      |
|----------------------|-----------------------|-----------------------|-------------------------------|-----------------------|-----------------------|----------------------|----------------------|----------------------|----------------------|-----------------------|-----------------------|----------------------|
| Aerobic Exercise     | -6.65 (-16.71, 4.36)  | -4.92 (-14.92, 5.55)  | 2.52 (-7.30, 13.81)           | -8.73 (-21.39, 4.65)  | -7.51 (-17.68, 3.02)  | -0.56 (-9.32, 9.02)  | 3.65 (-8.92, 14.74)  | 0.18 (-10.48, 7.93)  | 1.12 (-5.85, 8.87)   | -0.49 (-11.88, 10.59) | 1.94 (-5.84, 12.97)   | -4.07 (-15.04, 7.58) |
| 6.65 (-4.36, 16.71)  | Behavioral Training   | 1.94 (-8.50, 11.86)   | 9.63 (-0.91, 19.89)           | -1.48 (-15.24, 10.93) | -0.59 (-11.10, 9.42)  | 6.34 (-3.12, 14.94)  | 10.11 (-2.55, 21.11) | 6.78 (-3.93, 14.21)  | 7.92 (0.45, 14.97)   | 5.79 (-5.31, 16.69)   | 8.83 (0.52, 18.99)    | 2.17 (-8.33, 13.85)  |
| 4.92 (-5.55, 14.92)  | -1.94 (-11.86, 8.50)  | CIT                   | 7.25 (-2.13, 18.40)           | -3.79 (-16.32, 9.32)  | -2.66 (-12.45, 7.29)  | 4.04 (-4.63, 13.51)  | 8.44 (-4.21, 19.31)  | 5.12 (-5.11, 12.30)  | 6.05 (-1.03, 13.15)  | 4.31 (-6.98, 14.65)   | 6.76 (-0.91, 17.33)   | 0.56 (-10.06, 11.59) |
| -2.52 (-13.81, 7.30) | -9.63 (-19.89, 0.91)  | -7.25 (-18.40, 2.13)  | Cognitive Stimulated Training | -10.96 (-24.66, 1.85) | -9.83 (-21.03, -0.00) | -3.05 (-12.77, 5.92) | 0.56 (-12.79, 12.68) | -2.39 (-13.86, 5.42) | -1.27 (-9.45, 5.95)  | -3.25 (-15.57, 7.34)  | -0.71 (-8.08, 8.08)   | -7.06 (-18.48, 4.72) |
| 8.73 (-4.65, 21.39)  | 1.48 (-10.93, 15.24)  | 3.79 (-9.32, 16.32)   | 10.96 (-1.85, 24.66)          | Donepezil             | 1.14 (-6.65, 8.75)    | 7.83 (-3.35, 19.53)  | 12.31 (-3.19, 25.32) | 8.69 (-4.57, 19.06)  | 9.89 (-1.09, 20.21)  | 8.34 (-6.01, 21.23)   | 10.09 (-0.26, 23.65)  | 3.76 (-9.12, 18.18)  |
| 7.51 (-3.02, 17.68)  | 0.59 (-9.42, 11.10)   | 2.66 (-7.29, 12.45)   | 9.83 (0.00, 21.03)            | -1.14 (-8.75, 6.65)   | EGb 761               | 6.72 (-1.90, 15.88)  | 11.05 (-1.80, 21.90) | 7.65 (-2.90, 15.22)  | 8.75 (1.45, 15.87)   | 6.88 (-4.69, 17.52)   | 9.24 (1.20, 20.10)    | 3.16 (-7.72, 14.63)  |
| 0.56 (-9.02, 9.32)   | -6.34 (-14.94, 3.12)  | -4.04 (-13.51, 4.63)  | 3.05 (-5.92, 12.77)           | -7.83 (-19.53, 3.35)  | -6.72 (-15.88, 1.90)  | Exercise             | 4.09 (-7.76, 14.23)  | 0.73 (-8.50, 6.75)   | 2.04 (-3.72, 7.08)   | -0.03 (-10.33, 9.71)  | 2.38 (-4.32, 11.78)   | -3.72 (-13.34, 6.64) |
| -3.65 (-14.74, 8.92) | -10.11 (-21.11, 2.55) | -8.44 (-19.31, 4.21)  | -0.56 (-12.68, 12.79)         | -12.31 (-25.32, 3.19) | -11.05 (-21.90, 1.80) | -4.09 (-14.23, 7.76) | Light therapy        | -3.62 (-14.87, 7.22) | -2.22 (-11.54, 8.09) | -4.06 (-16.57, 9.06)  | -0.99 (-12.13, 11.51) | -7.54 (-19.74, 6.00) |
| -0.18 (-7.93, 10.48) | -6.78 (-14.21, 3.93)  | -5.12 (-12.30, 5.11)  | 2.39 (-5.42, 13.86)           | -8.69 (-19.06, 4.57)  | -7.65 (-15.22, 2.90)  | -0.73 (-6.75, 8.50)  | 3.62 (-7.22, 14.87)  | Multidomain Therapy  | 1.00 (-2.94, 8.06)   | -0.52 (-9.94, 10.34)  | 2.03 (-3.98, 12.62)   | -4.23 (-12.91, 7.26) |
| -1.12 (-8.87, 5.85)  | -7.92 (-14.97, -0.45) | -6.05 (-13.15, 1.03)  | 1.27 (-5.95, 9.45)            | -9.89 (-20.21, 1.09)  | -8.75 (-15.87, -1.45) | -2.04 (-7.08, 3.72)  | 2.22 (-8.09, 11.54)  | -1.00 (-8.06, 2.94)  | Placebo              | -1.78 (-10.63, 6.35)  | 0.85 (-4.21, 7.94)    | -5.46 (-13.57, 3.33) |
| 0.49 (-10.59, 11.88) | -5.79 (-16.69, 5.31)  | -4.31 (-14.65, 6.98)  | 3.25 (-7.34, 15.57)           | -8.34 (-21.23, 6.01)  | -6.88 (-17.52, 4.69)  | 0.03 (-9.71, 10.33)  | 4.06 (-9.06, 16.57)  | 0.52 (-10.34, 9.94)  | 1.78 (-6.35, 10.63)  | Psychosocial Therapy  | 2.92 (-6.44, 14.40)   | -3.46 (-14.92, 9.49) |
| -1.94 (-12.97, 5.84) | -8.83 (-18.99, -0.52) | -6.76 (-17.33, 0.91)  | 0.71 (-8.08, 8.08)            | -10.09 (-23.65, 0.26) | -9.24 (-20.10, -1.20) | -2.38 (-11.78, 4.32) | 0.99 (-11.51, 12.13) | -2.03 (-12.62, 3.98) | -0.85 (-7.94, 4.21)  | -2.92 (-14.40, 6.44)  | Reminiscence Therapy  | -6.63 (-17.63, 4.09) |
| 4.07 (-7.58, 15.04)  | -2.17 (-13.85, 8.33)  | -0.56 (-11.59, 10.06) | 7.06 (-4.72, 18.48)           | -3.76 (-18.18, 9.12)  | -3.16 (-14.63, 7.72)  | 3.72 (-6.64, 13.34)  | 7.54 (-6.00, 19.74)  | 4.23 (-7.26, 12.91)  | 5.46 (-3.33, 13.57)  | 3.46 (-9.49, 14.92)   | 6.63 (-4.09, 17.63)   | Sertraline           |
