# Supplementary material for: Comparative efficacy and acceptability of treatments for depressive symptoms in cognitive impairment: A systematic review and Bayesian network meta-analysis
Source: Frontiers journal article supplement (doi:10.3389/fnagi.2022.1037414), 2022-12-12
Supplement: Data_Sheet_1.zip [file Data_Sheet_1.zip]

**A. Total adverse events**

| Drug            | Rank 1 | Rank 2 | Rank 3 | Rank 4 | Rank 5 |
|-----------------|--------|--------|--------|--------|--------|
| Citalopram      | 0.06   | 0.22   | 0.36   | 0.32   | 0.03   |
| Hormone Therapy | 0.12   | 0.17   | 0.22   | 0.42   | 0.06   |
| Placebo         | 0.68   | 0.24   | 0.07   | 0.01   | 0      |
| Sertraline      | 0.13   | 0.35   | 0.33   | 0.18   | 0.02   |
| Venlafaxine     | 0.01   | 0.01   | 0.02   | 0.07   | 0.89   |

**B. Serious adverse event**

| Drug         | Rank 1 | Rank 2 | Rank 3 | Rank 4 | Rank 5 | Rank 6 |
|--------------|--------|--------|--------|--------|--------|--------|
| Aripiprazole | 0.04   | 0.14   | 0.31   | 0.33   | 0.16   | 0.02   |
| EGB 761      | 0.74   | 0.16   | 0.06   | 0.03   | 0.01   | 0      |
| Fluoxetine   | 0.1    | 0.07   | 0.05   | 0.09   | 0.29   | 0.4    |
| Placebo      | 0.05   | 0.49   | 0.33   | 0.11   | 0.02   | 0      |
| Sertraline   | 0.05   | 0.13   | 0.23   | 0.4    | 0.19   | 0.01   |
| Venlafaxine  | 0.02   | 0.02   | 0.02   | 0.04   | 0.33   | 0.57   |

**C. Diarrhea**

| Drug         | Rank 1 | Rank 2 | Rank 3 | Rank 4 | Rank 5 |
|--------------|--------|--------|--------|--------|--------|
| Aripiprazole | 0.18   | 0.17   | 0.13   | 0.24   | 0.28   |
| Citalopram   | 0.42   | 0.08   | 0.06   | 0.09   | 0.35   |
| EGB 761      | 0.15   | 0.2    | 0.23   | 0.25   | 0.16   |
| Placebo      | 0.13   | 0.36   | 0.34   | 0.14   | 0.02   |
| Sertraline   | 0.12   | 0.19   | 0.24   | 0.27   | 0.18   |

**D. Headache**

| Drug            | Rank 1 | Rank 2 | Rank 3 | Rank 4 | Rank 5 | Rank 6 |
|-----------------|--------|--------|--------|--------|--------|--------|
| Aripiprazole    | 0.01   | 0.04   | 0.1    | 0.1    | 0.27   | 0.48   |
| EGB 761         | 0.13   | 0.72   | 0.11   | 0.03   | 0.01   | 0      |
| Hormone Therapy | 0.01   | 0.05   | 0.11   | 0.1    | 0.32   | 0.41   |
| Placebo         | 0      | 0.03   | 0.2    | 0.5    | 0.22   | 0.04   |
| Sertraline      | 0      | 0.08   | 0.45   | 0.25   | 0.16   | 0.06   |
| Venlafaxine     | 0.85   | 0.08   | 0.03   | 0.02   | 0.02   | 0.01   |

**E. Nausea**

| Drug            | Rank 1 | Rank 2 | Rank 3 | Rank 4 | Rank 5 | Rank 6 | Rank 7 |
|-----------------|--------|--------|--------|--------|--------|--------|--------|
| Citalopram      | 0.32   | 0.22   | 0.15   | 0.11   | 0.11   | 0.06   | 0.03   |
| EGB 761         | 0.32   | 0.26   | 0.16   | 0.12   | 0.08   | 0.04   | 0.01   |
| Hormone Therapy | 0.12   | 0.09   | 0.07   | 0.08   | 0.12   | 0.2    | 0.32   |
| Placebo         | 0.01   | 0.09   | 0.28   | 0.38   | 0.2    | 0.04   | 0      |
| Rivastigmine    | 0.18   | 0.27   | 0.23   | 0.14   | 0.12   | 0.05   | 0.02   |
| Sertraline      | 0.03   | 0.06   | 0.09   | 0.14   | 0.3    | 0.33   | 0.05   |
| Venlafaxine     | 0.01   | 0.02   | 0.02   | 0.03   | 0.07   | 0.28   | 0.57   |
