# Supplementary material for: Comparative efficacy and acceptability of treatments for depressive symptoms in cognitive impairment: A systematic review and Bayesian network meta-analysis
Source: Frontiers journal article supplement (doi:10.3389/fnagi.2022.1037414), 2022-12-12
Supplement: Data_Sheet_1.zip [file Data_Sheet_1.zip]

### A. Cornell Scale for Depression

| Drug                              | Rank 1 | Rank 2 | Rank 3 | Rank 4 | Rank 5 | Rank 6 | Rank 7 | Rank 8 | Rank 9 | Rank 10 | Rank 11 | Rank 12 | Rank 13 | Rank 14 | Rank 15 | Rank 16 | Rank 17 | Rank 18 | Rank 19 | Rank 20 | Rank 21 | Rank 22 |
|-----------------------------------|--------|--------|--------|--------|--------|--------|--------|--------|--------|---------|---------|---------|---------|---------|---------|---------|---------|---------|---------|---------|---------|---------|
| Aerobic Exercise                  | 0      | 0.48   | 0.23   | 0.1    | 0.05   | 0.03   | 0.02   | 0.02   | 0.01   | 0.01    | 0.01    | 0.01    | 0       | 0       | 0       | 0       | 0       | 0       | 0       | 0.01    | 0       | 0       |
| Aripiprazole                      | 0      | 0.01   | 0.03   | 0.06   | 0.1    | 0.12   | 0.14   | 0.13   | 0.11   | 0.08    | 0.06    | 0.04    | 0.03    | 0.02    | 0.02    | 0.01    | 0.01    | 0.01    | 0.01    | 0.01    | 0.01    | 0       |
| Behavioral Training               | 0      | 0      | 0      | 0      | 0      | 0.02   | 0.04   | 0.08   | 0.13   | 0.16    | 0.17    | 0.14    | 0.1     | 0.07    | 0.04    | 0.02    | 0.01    | 0.01    | 0       | 0       | 0       | 0       |
| Citalopram                        | 0      | 0.01   | 0.02   | 0.05   | 0.06   | 0.08   | 0.08   | 0.08   | 0.07   | 0.07    | 0.05    | 0.05    | 0.04    | 0.04    | 0.04    | 0.03    | 0.03    | 0.03    | 0.03    | 0.05    | 0.08    | 0.01    |
| Cognitive stimulated training     | 0      | 0      | 0      | 0      | 0      | 0      | 0      | 0      | 0.01   | 0.01    | 0.03    | 0.04    | 0.05    | 0.08    | 0.1     | 0.11    | 0.12    | 0.13    | 0.12    | 0.12    | 0.08    | 0       |
| Discontinuation of antipsychotics | 0      | 0      | 0.01   | 0.02   | 0.03   | 0.04   | 0.05   | 0.06   | 0.06   | 0.06    | 0.06    | 0.06    | 0.06    | 0.05    | 0.05    | 0.05    | 0.05    | 0.04    | 0.05    | 0.07    | 0.13    | 0.01    |
| Electrical Current Therapy        | 0      | 0.19   | 0.16   | 0.23   | 0.14   | 0.08   | 0.05   | 0.04   | 0.03   | 0.02    | 0.01    | 0.01    | 0.01    | 0.01    | 0       | 0       | 0       | 0       | 0       | 0       | 0       | 0       |
| Exercise                          | 0      | 0      | 0      | 0      | 0      | 0      | 0.01   | 0.01   | 0.02   | 0.03    | 0.04    | 0.06    | 0.07    | 0.09    | 0.1     | 0.1     | 0.1     | 0.09    | 0.09    | 0.09    | 0.08    | 0       |
| Light therapy                     | 0      | 0      | 0      | 0.01   | 0.01   | 0.03   | 0.05   | 0.07   | 0.08   | 0.09    | 0.09    | 0.08    | 0.07    | 0.07    | 0.06    | 0.06    | 0.05    | 0.04    | 0.04    | 0.04    | 0.04    | 0       |
| Massage                           | 1      | 0      | 0      | 0      | 0      | 0      | 0      | 0      | 0      | 0       | 0       | 0       | 0       | 0       | 0       | 0       | 0       | 0       | 0       | 0       | 0       | 0       |
| Mirtazapine                       | 0      | 0      | 0      | 0      | 0.01   | 0.02   | 0.02   | 0.04   | 0.05   | 0.07    | 0.07    | 0.08    | 0.08    | 0.08    | 0.08    | 0.08    | 0.07    | 0.06    | 0.06    | 0.07    | 0.06    | 0       |
| Multidomain Therapy               | 0      | 0      | 0      | 0      | 0      | 0      | 0      | 0.01   | 0.02   | 0.03    | 0.06    | 0.09    | 0.12    | 0.14    | 0.15    | 0.14    | 0.11    | 0.07    | 0.04    | 0.02    | 0.01    | 0       |
| Music Therapy                     | 0      | 0.06   | 0.1    | 0.16   | 0.18   | 0.14   | 0.11   | 0.08   | 0.05   | 0.03    | 0.02    | 0.02    | 0.01    | 0.01    | 0.01    | 0       | 0       | 0       | 0       | 0       | 0       | 0       |
| Occupational Therapy              | 0      | 0      | 0      | 0.01   | 0.02   | 0.04   | 0.06   | 0.09   | 0.1    | 0.11    | 0.1     | 0.09    | 0.08    | 0.07    | 0.06    | 0.04    | 0.04    | 0.03    | 0.02    | 0.02    | 0.01    | 0       |
| Placebo                           | 0      | 0      | 0      | 0      | 0      | 0      | 0      | 0      | 0      | 0       | 0       | 0       | 0       | 0.01    | 0.03    | 0.08    | 0.15    | 0.23    | 0.25    | 0.18    | 0.06    | 0       |
| Pet/Robot-Assisted Therapy        | 0      | 0.1    | 0.09   | 0.13   | 0.12   | 0.09   | 0.07   | 0.06   | 0.05   | 0.04    | 0.03    | 0.03    | 0.02    | 0.02    | 0.02    | 0.02    | 0.02    | 0.01    | 0.01    | 0.03    | 0.05    | 0.01    |
| Psychosocial Therapy              | 0      | 0      | 0      | 0.01   | 0.02   | 0.03   | 0.05   | 0.07   | 0.09   | 0.09    | 0.08    | 0.08    | 0.07    | 0.07    | 0.06    | 0.05    | 0.04    | 0.04    | 0.04    | 0.04    | 0.05    | 0       |
| Reminiscence Therapy              | 0      | 0.01   | 0.04   | 0.1    | 0.18   | 0.23   | 0.2    | 0.13   | 0.06   | 0.03    | 0.01    | 0.01    | 0       | 0       | 0       | 0       | 0       | 0       | 0       | 0       | 0       | 0       |
| Sertraline                        | 0      | 0      | 0      | 0      | 0      | 0      | 0.01   | 0.01   | 0.02   | 0.04    | 0.06    | 0.07    | 0.09    | 0.1     | 0.11    | 0.1     | 0.1     | 0.08    | 0.07    | 0.07    | 0.06    | 0       |
| Strength Exercise                 | 0      | 0.13   | 0.3    | 0.13   | 0.08   | 0.06   | 0.04   | 0.03   | 0.03   | 0.02    | 0.02    | 0.01    | 0.02    | 0.01    | 0.01    | 0.01    | 0.01    | 0.01    | 0.01    | 0.02    | 0.05    | 0.01    |
| Tai Chi                           | 0      | 0      | 0      | 0      | 0      | 0      | 0      | 0.01   | 0.01   | 0.01    | 0.02    | 0.03    | 0.04    | 0.05    | 0.06    | 0.08    | 0.09    | 0.11    | 0.12    | 0.16    | 0.2     | 0.01    |
| Venlafaxine                       | 0      | 0      | 0      | 0      | 0      | 0      | 0      | 0      | 0      | 0       | 0       | 0       | 0       | 0       | 0       | 0       | 0       | 0       | 0       | 0.01    | 0.03    | 0.93    |

### B. Geriatric Depression Scale

| Drug                          | Rank 1 | Rank 2 | Rank 3 | Rank 4 | Rank 5 | Rank 6 | Rank 7 | Rank 8 | Rank 9 | Rank 10 | Rank 11 | Rank 12 | Rank 13 | Rank 14 | Rank 15 | Rank 16 | Rank 17 | Rank 18 | Rank 19 |
|-------------------------------|--------|--------|--------|--------|--------|--------|--------|--------|--------|---------|---------|---------|---------|---------|---------|---------|---------|---------|---------|
| Aerobic Exercise              | 0.01   | 0.03   | 0.03   | 0.04   | 0.04   | 0.05   | 0.05   | 0.06   | 0.06   | 0.07    | 0.07    | 0.06    | 0.06    | 0.07    | 0.07    | 0.08    | 0.08    | 0.06    | 0.02    |
| Behavioral Training           | 0      | 0.02   | 0.04   | 0.07   | 0.09   | 0.11   | 0.12   | 0.12   | 0.11   | 0.09    | 0.07    | 0.04    | 0.04    | 0.02    | 0.02    | 0.01    | 0.01    | 0       | 0       |
| CIT                           | 0.02   | 0.04   | 0.05   | 0.05   | 0.05   | 0.06   | 0.06   | 0.06   | 0.07   | 0.06    | 0.06    | 0.05    | 0.05    | 0.05    | 0.06    | 0.06    | 0.05    | 0.03    |         |
| Cognitive stimulated training | 0      | 0.01   | 0.01   | 0.02   | 0.02   | 0.03   | 0.04   | 0.05   | 0.06   | 0.06    | 0.07    | 0.08    | 0.08    | 0.08    | 0.09    | 0.1     | 0.09    | 0.08    | 0.04    |
| Electrical Current Therapy    | 0.11   | 0.12   | 0.09   | 0.07   | 0.06   | 0.06   | 0.05   | 0.05   | 0.05   | 0.04    | 0.04    | 0.03    | 0.03    | 0.03    | 0.03    | 0.04    | 0.03    | 0.03    | 0.02    |
| EGb 761                       | 0      | 0.01   | 0.01   | 0.02   | 0.02   | 0.02   | 0.03   | 0.04   | 0.04   | 0.04    | 0.05    | 0.06    | 0.06    | 0.07    | 0.08    | 0.1     | 0.12    | 0.14    | 0.1     |
| Exercise                      | 0.01   | 0.02   | 0.02   | 0.03   | 0.03   | 0.03   | 0.04   | 0.05   | 0.06   | 0.06    | 0.06    | 0.06    | 0.06    | 0.07    | 0.08    | 0.09    | 0.1     | 0.09    | 0.05    |
| Hormone Therapy               | 0      | 0.01   | 0.01   | 0.02   | 0.02   | 0.03   | 0.03   | 0.04   | 0.04   | 0.05    | 0.06    | 0.07    | 0.07    | 0.08    | 0.09    | 0.1     | 0.11    | 0.12    | 0.07    |
| Massage                       | 0.06   | 0.1    | 0.1    | 0.09   | 0.08   | 0.08   | 0.07   | 0.07   | 0.06   | 0.05    | 0.05    | 0.03    | 0.03    | 0.03    | 0.03    | 0.02    | 0.02    | 0.01    | 0.01    |
| Multidomain Therapy           | 0.06   | 0.18   | 0.17   | 0.14   | 0.11   | 0.09   | 0.07   | 0.05   | 0.04   | 0.03    | 0.02    | 0.01    | 0.01    | 0.01    | 0       | 0       | 0       | 0       | 0       |
| Music Therapy                 | 0.06   | 0.13   | 0.13   | 0.12   | 0.1    | 0.08   | 0.07   | 0.07   | 0.06   | 0.05    | 0.03    | 0.02    | 0.02    | 0.02    | 0.01    | 0.01    | 0.01    | 0       | 0       |
| Placebo                       | 0      | 0      | 0      | 0      | 0      | 0      | 0      | 0      | 0.02   | 0.05    | 0.11    | 0.21    | 0.21    | 0.19    | 0.14    | 0.07    | 0.03    | 0       | 0       |
| Psychosocial Therapy          | 0      | 0.01   | 0.02   | 0.03   | 0.05   | 0.06   | 0.07   | 0.08   | 0.09   | 0.09    | 0.09    | 0.07    | 0.07    | 0.06    | 0.06    | 0.05    | 0.04    | 0.02    | 0.01    |
| Reminiscence Therapy          | 0.01   | 0.04   | 0.1    | 0.14   | 0.15   | 0.14   | 0.13   | 0.1    | 0.07   | 0.05    | 0.03    | 0.01    | 0.01    | 0.01    | 0       | 0       | 0       | 0       | 0       |
| Rivastigmine                  | 0.56   | 0.17   | 0.08   | 0.05   | 0.03   | 0.02   | 0.02   | 0.01   | 0.01   | 0.01    | 0.01    | 0       | 0       | 0       | 0       | 0       | 0       | 0       | 0       |
| Sertraline                    | 0.01   | 0.01   | 0.02   | 0.03   | 0.03   | 0.04   | 0.04   | 0.05   | 0.06   | 0.06    | 0.07    | 0.07    | 0.07    | 0.07    | 0.08    | 0.1     | 0.1     | 0.09    | 0.02    |
| Strength Exercise             | 0.03   | 0.04   | 0.04   | 0.04   | 0.04   | 0.04   | 0.04   | 0.04   | 0.05   | 0.05    | 0.05    | 0.05    | 0.05    | 0.05    | 0.06    | 0.07    | 0.08    | 0.1     | 0.09    |
| Tai Chi                       | 0.03   | 0.05   | 0.05   | 0.04   | 0.05   | 0.05   | 0.05   | 0.05   | 0.05   | 0.05    | 0.05    | 0.05    | 0.05    | 0.05    | 0.05    | 0.06    | 0.07    | 0.08    | 0.06    |
| Venlafaxine                   | 0.01   | 0.01   | 0.01   | 0.01   | 0.01   | 0.01   | 0.01   | 0.02   | 0.02   | 0.02    | 0.02    | 0.02    | 0.02    | 0.03    | 0.04    | 0.05    | 0.07    | 0.12    | 0.48    |

### C. Hamilton Depression Rating Scale

| Drug                          | Rank 1 | Rank 2 | Rank 3 | Rank 4 | Rank 5 | Rank 6 | Rank 7 | Rank 8 | Rank 9 | Rank 10 | Rank 11 | Rank 12 | Rank 13 | Rank 14 | Rank 15 | Rank 16 |
|-------------------------------|--------|--------|--------|--------|--------|--------|--------|--------|--------|---------|---------|---------|---------|---------|---------|---------|
| Amitriptyline                 | 0      | 0      | 0      | 0      | 0      | 0      | 0      | 0      | 0      | 0       | 0       | 0       | 0.01    | 0.01    | 0.03    | 0.94    |
| Behavioral Training           | 0.01   | 0.11   | 0.17   | 0.19   | 0.18   | 0.13   | 0.09   | 0.05   | 0.03   | 0.02    | 0.01    | 0       | 0       | 0       | 0       | 0       |
| Citalopram                    | 0.03   | 0.17   | 0.14   | 0.14   | 0.12   | 0.1    | 0.08   | 0.06   | 0.05   | 0.03    | 0.02    | 0.01    | 0.01    | 0.01    | 0       | 0       |
| Cognitive stimulated training | 0.03   | 0.2    | 0.17   | 0.16   | 0.13   | 0.1    | 0.07   | 0.05   | 0.04   | 0.02    | 0.01    | 0.01    | 0       | 0       | 0       | 0       |
| Donepezil                     | 0      | 0      | 0      | 0.01   | 0.01   | 0.02   | 0.04   | 0.08   | 0.13   | 0.19    | 0.2     | 0.13    | 0.09    | 0.06    | 0.02    | 0       |
| EGb 761                       | 0      | 0.01   | 0.02   | 0.05   | 0.09   | 0.13   | 0.16   | 0.18   | 0.16   | 0.1     | 0.05    | 0.02    | 0.02    | 0.01    | 0.01    | 0       |
| Exercise                      | 0      | 0      | 0      | 0      | 0.01   | 0.02   | 0.03   | 0.06   | 0.09   | 0.14    | 0.18    | 0.17    | 0.15    | 0.12    | 0.04    | 0       |
| Fluoxetine                    | 0      | 0      | 0      | 0      | 0.01   | 0.01   | 0.01   | 0.02   | 0.02   | 0.03    | 0.04    | 0.05    | 0.07    | 0.14    | 0.61    | 0.01    |
| Hormone Therapy               | 0      | 0.02   | 0.02   | 0.04   | 0.05   | 0.07   | 0.08   | 0.09   | 0.11   | 0.12    | 0.1     | 0.07    | 0.08    | 0.1     | 0.05    | 0.01    |
| Imipramine                    | 0      | 0      | 0      | 0      | 0      | 0      | 0.01   | 0.02   | 0.03   | 0.05    | 0.08    | 0.1     | 0.16    | 0.34    | 0.18    | 0.02    |
| Multidomain Therapy           | 0.01   | 0.06   | 0.08   | 0.1    | 0.12   | 0.12   | 0.13   | 0.11   | 0.09   | 0.07    | 0.04    | 0.03    | 0.02    | 0.01    | 0.01    | 0       |
| Music Therapy                 | 0.85   | 0.07   | 0.03   | 0.02   | 0.01   | 0.01   | 0      | 0      | 0      | 0       | 0       | 0       | 0       | 0       | 0       | 0       |
| Placebo                       | 0      | 0      | 0      | 0      | 0      | 0      | 0      | 0      | 0.01   | 0.05    | 0.15    | 0.31    | 0.33    | 0.13    | 0.02    | 0       |
| Rivastigmine                  | 0      | 0.02   | 0.04   | 0.06   | 0.09   | 0.11   | 0.14   | 0.15   | 0.13   | 0.1     | 0.06    | 0.04    | 0.03    | 0.02    | 0.01    | 0       |
| Sertraline                    | 0.05   | 0.28   | 0.2    | 0.14   | 0.11   | 0.07   | 0.05   | 0.04   | 0.02   | 0.01    | 0.01    | 0.01    | 0       | 0       | 0       | 0       |

#### D. Mini-Mental State Examination

| Drug                          | Rank 1 | Rank 2 | Rank 3 | Rank 4 | Rank 5 | Rank 6 | Rank 7 | Rank 8 | Rank 9 | Rank 10 | Rank 11 | Rank 12 | Rank 13 | Rank 14 | Rank 15 | Rank 16 | Rank 17 | Rank 18 | Rank 19 | Rank 20 | Rank 21 | Rank 22 |
|-------------------------------|--------|--------|--------|--------|--------|--------|--------|--------|--------|---------|---------|---------|---------|---------|---------|---------|---------|---------|---------|---------|---------|---------|
| Amitriptyline                 | 0.01   | 0.05   | 0.08   | 0.07   | 0.06   | 0.06   | 0.06   | 0.06   | 0.06   | 0.06    | 0.05    | 0.04    | 0.04    | 0.04    | 0.03    | 0.03    | 0.04    | 0.04    | 0.04    | 0.04    | 0.03    | 0.02    |
| Aripiprazole                  | 0      | 0      | 0      | 0      | 0      | 0      | 0      | 0.01   | 0.01   | 0.02    | 0.03    | 0.05    | 0.06    | 0.07    | 0.1     | 0.12    | 0.13    | 0.14    | 0.12    | 0.08    | 0.04    | 0.01    |
| Behavioral Training           | 0      | 0      | 0      | 0      | 0.01   | 0.01   | 0.02   | 0.02   | 0.04   | 0.05    | 0.06    | 0.07    | 0.08    | 0.08    | 0.08    | 0.09    | 0.1     | 0.1     | 0.08    | 0.06    | 0.03    | 0.01    |
| Citalopram                    | 0.02   | 0.06   | 0.1    | 0.1    | 0.08   | 0.08   | 0.08   | 0.07   | 0.06   | 0.06    | 0.05    | 0.04    | 0.03    | 0.03    | 0.03    | 0.02    | 0.02    | 0.02    | 0.02    | 0.01    | 0.01    | 0       |
| Cognitive stimulated training | 0      | 0.02   | 0.07   | 0.13   | 0.17   | 0.17   | 0.15   | 0.12   | 0.08   | 0.04    | 0.03    | 0.01    | 0.01    | 0       | 0       | 0       | 0       | 0       | 0       | 0       | 0       | 0       |
| Electrical Current Therapy    | 0.6    | 0.22   | 0.08   | 0.03   | 0.02   | 0.01   | 0.01   | 0.01   | 0      | 0       | 0       | 0       | 0       | 0       | 0       | 0       | 0       | 0       | 0       | 0       | 0       | 0       |
| EGB 761                       | 0      | 0      | 0.01   | 0.02   | 0.03   | 0.04   | 0.06   | 0.07   | 0.09   | 0.1     | 0.1     | 0.09    | 0.08    | 0.07    | 0.06    | 0.05    | 0.05    | 0.04    | 0.03    | 0.02    | 0.01    | 0       |
| Exercise                      | 0      | 0.01   | 0.02   | 0.04   | 0.05   | 0.06   | 0.08   | 0.09   | 0.09   | 0.1     | 0.09    | 0.08    | 0.06    | 0.05    | 0.04    | 0.04    | 0.04    | 0.03    | 0.02    | 0.01    | 0.01    | 0       |
| Fluoxetine                    | 0      | 0      | 0      | 0.01   | 0.01   | 0.01   | 0.01   | 0.01   | 0.01   | 0.02    | 0.02    | 0.03    | 0.03    | 0.03    | 0.03    | 0.04    | 0.05    | 0.07    | 0.09    | 0.13    | 0.18    | 0.23    |
| Hormone Therapy               | 0      | 0.01   | 0.01   | 0.02   | 0.03   | 0.03   | 0.03   | 0.04   | 0.05   | 0.05    | 0.06    | 0.06    | 0.06    | 0.05    | 0.05    | 0.06    | 0.07    | 0.07    | 0.08    | 0.07    | 0.06    | 0.03    |
| Imipramine                    | 0      | 0.01   | 0.01   | 0.02   | 0.02   | 0.02   | 0.02   | 0.03   | 0.03   | 0.03    | 0.03    | 0.04    | 0.04    | 0.04    | 0.04    | 0.05    | 0.06    | 0.07    | 0.09    | 0.11    | 0.13    | 0.13    |
| Light therapy                 | 0      | 0.01   | 0.02   | 0.03   | 0.03   | 0.03   | 0.04   | 0.04   | 0.05   | 0.05    | 0.04    | 0.05    | 0.04    | 0.04    | 0.04    | 0.05    | 0.06    | 0.07    | 0.07    | 0.08    | 0.09    | 0.06    |
| Massage                       | 0.03   | 0.08   | 0.1    | 0.09   | 0.07   | 0.06   | 0.06   | 0.06   | 0.06   | 0.05    | 0.05    | 0.04    | 0.04    | 0.03    | 0.03    | 0.03    | 0.03    | 0.03    | 0.03    | 0.03    | 0.02    | 0.01    |
| Multidomain Therapy           | 0      | 0.01   | 0.02   | 0.03   | 0.04   | 0.05   | 0.05   | 0.06   | 0.07   | 0.07    | 0.07    | 0.07    | 0.06    | 0.05    | 0.05    | 0.06    | 0.06    | 0.06    | 0.05    | 0.04    | 0.03    | 0.01    |
| Music Therapy                 | 0.22   | 0.31   | 0.16   | 0.07   | 0.05   | 0.03   | 0.03   | 0.02   | 0.02   | 0.02    | 0.01    | 0.01    | 0.01    | 0.01    | 0.01    | 0.01    | 0       | 0       | 0       | 0       | 0       | 0       |
| Occupational Therapy          | 0.11   | 0.14   | 0.12   | 0.07   | 0.05   | 0.04   | 0.04   | 0.04   | 0.03   | 0.03    | 0.03    | 0.03    | 0.02    | 0.02    | 0.02    | 0.02    | 0.02    | 0.03    | 0.03    | 0.03    | 0.03    | 0.04    |
| Placebo                       | 0      | 0      | 0      | 0      | 0      | 0      | 0      | 0      | 0      | 0.01    | 0.04    | 0.1     | 0.17    | 0.22    | 0.21    | 0.14    | 0.07    | 0.03    | 0.01    | 0       | 0       | 0       |
| Psychosocial Therapy          | 0      | 0      | 0      | 0.01   | 0.02   | 0.02   | 0.03   | 0.04   | 0.06   | 0.07    | 0.08    | 0.08    | 0.08    | 0.08    | 0.08    | 0.08    | 0.08    | 0.07    | 0.06    | 0.04    | 0.02    | 0.01    |
| Reminiscence Therapy          | 0      | 0.02   | 0.07   | 0.11   | 0.13   | 0.13   | 0.12   | 0.11   | 0.09   | 0.07    | 0.05    | 0.03    | 0.02    | 0.01    | 0.01    | 0.01    | 0       | 0       | 0       | 0       | 0       | 0       |
| Rivastigmine                  | 0.01   | 0.05   | 0.11   | 0.14   | 0.13   | 0.12   | 0.1    | 0.09   | 0.07   | 0.06    | 0.04    | 0.03    | 0.02    | 0.01    | 0.01    | 0.01    | 0       | 0       | 0       | 0       | 0       | 0       |
| Sertraline                    | 0      | 0      | 0      | 0      | 0      | 0      | 0.01   | 0.01   | 0.01   | 0.01    | 0.01    | 0.02    | 0.02    | 0.02    | 0.02    | 0.03    | 0.04    | 0.06    | 0.08    | 0.12    | 0.2     | 0.34    |
| Tai Chi                       | 0      | 0      | 0.01   | 0.01   | 0.01   | 0.02   | 0.02   | 0.02   | 0.03   | 0.04    | 0.04    | 0.04    | 0.04    | 0.04    | 0.05    | 0.06    | 0.07    | 0.08    | 0.1     | 0.11    | 0.11    | 0.08    |

#### E. Neuropsychiatric Inventory

| Drug                              | Rank 1 | Rank 2 | Rank 3 | Rank 4 | Rank 5 | Rank 6 | Rank 7 | Rank 8 | Rank 9 | Rank 10 | Rank 11 | Rank 12 | Rank 13 | Rank 14 | Rank 15 | Rank 16 | Rank 17 | Rank 18 |
|-----------------------------------|--------|--------|--------|--------|--------|--------|--------|--------|--------|---------|---------|---------|---------|---------|---------|---------|---------|---------|
| Aerobic Exercise                  | 0.02   | 0.04   | 0.05   | 0.09   | 0.14   | 0.16   | 0.17   | 0.15   | 0.07   | 0.04    | 0.03    | 0.02    | 0.01    | 0.01    | 0       | 0       | 0       | 0       |
| Aripiprazole                      | 0      | 0      | 0      | 0      | 0      | 0.01   | 0.05   | 0.12   | 0.23   | 0.24    | 0.19    | 0.08    | 0.04    | 0.02    | 0.01    | 0       | 0       | 0       |
| Analgesic Treatment               | 0.33   | 0.22   | 0.14   | 0.13   | 0.07   | 0.06   | 0.03   | 0.01   | 0.01   | 0       | 0       | 0       | 0       | 0       | 0       | 0       | 0       | 0       |
| Behavioral Training               | 0.05   | 0.09   | 0.17   | 0.3    | 0.2    | 0.1    | 0.06   | 0.02   | 0.01   | 0       | 0       | 0       | 0       | 0       | 0       | 0       | 0       | 0       |
| Citalopram                        | 0      | 0.01   | 0.02   | 0.07   | 0.24   | 0.31   | 0.21   | 0.09   | 0.02   | 0.01    | 0       | 0       | 0       | 0       | 0       | 0       | 0       | 0       |
| Cognitive stimulated training     | 0      | 0      | 0      | 0      | 0      | 0.01   | 0.01   | 0.04   | 0.06   | 0.1     | 0.12    | 0.14    | 0.14    | 0.1     | 0.09    | 0.1     | 0.07    | 0.02    |
| Discontinuation of antipsychotics | 0      | 0      | 0      | 0      | 0      | 0      | 0.01   | 0.01   | 0.02   | 0.02    | 0.04    | 0.04    | 0.05    | 0.04    | 0.06    | 0.12    | 0.24    | 0.35    |
| Donepezil                         | 0.48   | 0.23   | 0.12   | 0.08   | 0.05   | 0.02   | 0.01   | 0.01   | 0      | 0       | 0       | 0       | 0       | 0       | 0       | 0       | 0       | 0       |
| EGB 761                           | 0.07   | 0.33   | 0.39   | 0.16   | 0.04   | 0.01   | 0      | 0      | 0      | 0       | 0       | 0       | 0       | 0       | 0       | 0       | 0       | 0       |
| Exercise                          | 0      | 0      | 0      | 0      | 0      | 0.01   | 0.02   | 0.07   | 0.16   | 0.21    | 0.17    | 0.14    | 0.09    | 0.05    | 0.03    | 0.02    | 0.01    | 0       |
| Light therapy                     | 0      | 0      | 0      | 0.01   | 0.01   | 0.01   | 0.02   | 0.03   | 0.04   | 0.04    | 0.04    | 0.04    | 0.04    | 0.05    | 0.06    | 0.08    | 0.16    | 0.38    |
| Multidomain Therapy               | 0      | 0      | 0      | 0      | 0      | 0      | 0.01   | 0.02   | 0.04   | 0.09    | 0.17    | 0.22    | 0.19    | 0.12    | 0.07    | 0.03    | 0.01    | 0       |
| Music Therapy                     | 0.01   | 0.02   | 0.02   | 0.02   | 0.03   | 0.04   | 0.09   | 0.08   | 0.09   | 0.06    | 0.05    | 0.05    | 0.04    | 0.03    | 0.04    | 0.07    | 0.11    | 0.11    |
| Placebo                           | 0      | 0      | 0      | 0      | 0      | 0      | 0      | 0      | 0      | 0       | 0.01    | 0.05    | 0.18    | 0.3     | 0.27    | 0.14    | 0.05    | 0       |
| Psychosocial Therapy              | 0      | 0.01   | 0.02   | 0.05   | 0.08   | 0.12   | 0.16   | 0.21   | 0.13   | 0.08    | 0.05    | 0.04    | 0.02    | 0.01    | 0.01    | 0       | 0       | 0       |
| Reminiscence Therapy              | 0      | 0      | 0      | 0      | 0      | 0      | 0      | 0.01   | 0.02   | 0.04    | 0.06    | 0.09    | 0.09    | 0.11    | 0.12    | 0.2     | 0.17    | 0.07    |
| Sertraline                        | 0.03   | 0.05   | 0.07   | 0.09   | 0.13   | 0.13   | 0.13   | 0.12   | 0.08   | 0.05    | 0.04    | 0.02    | 0.02    | 0.01    | 0.01    | 0.01    | 0.01    | 0       |
| Tai Chi                           | 0      | 0      | 0      | 0      | 0      | 0      | 0      | 0.01   | 0.01   | 0.02    | 0.03    | 0.05    | 0.08    | 0.14    | 0.22    | 0.21    | 0.16    | 0.06    |

#### Cohen-Mansfeld Agitation Inventory

| Drug                       | Rank 1 | Rank 2 | Rank 3 | Rank 4 | Rank 5 | Rank 6 | Rank 7 | Rank 8 | Rank 9 |
|----------------------------|--------|--------|--------|--------|--------|--------|--------|--------|--------|
| Aripiprazole               | 0.02   | 0.11   | 0.19   | 0.25   | 0.2    | 0.12   | 0.07   | 0.02   | 0.01   |
| Analgesic Treatment        | 0.02   | 0.06   | 0.09   | 0.11   | 0.14   | 0.16   | 0.21   | 0.13   | 0.07   |
| Citalopram                 | 0.02   | 0.05   | 0.09   | 0.14   | 0.19   | 0.25   | 0.16   | 0.07   | 0.04   |
| Fluoxetine                 | 0.01   | 0.02   | 0.03   | 0.03   | 0.04   | 0.06   | 0.07   | 0.12   | 0.63   |
| Light therapy              | 0.06   | 0.18   | 0.18   | 0.16   | 0.15   | 0.11   | 0.08   | 0.05   | 0.03   |
| Massage                    | 0.06   | 0.21   | 0.24   | 0.17   | 0.13   | 0.09   | 0.06   | 0.03   | 0.01   |
| Placebo                    | 0      | 0      | 0      | 0.01   | 0.02   | 0.08   | 0.23   | 0.49   | 0.17   |
| Pet/Robot-Assisted Therapy | 0.62   | 0.19   | 0.08   | 0.04   | 0.03   | 0.02   | 0.01   | 0.01   | 0      |
| Sertraline                 | 0.18   | 0.19   | 0.11   | 0.09   | 0.1    | 0.12   | 0.11   | 0.07   | 0.04   |
