# Supplementary material for: Comparative efficacy and acceptability of treatments for depressive symptoms in cognitive impairment: A systematic review and Bayesian network meta-analysis
Source: Frontiers journal article supplement (doi:10.3389/fnagi.2022.1037414), 2022-12-12
Supplement: Data_Sheet_1.zip [file Data_Sheet_1.zip]

### A. Cornell Scale for Depression

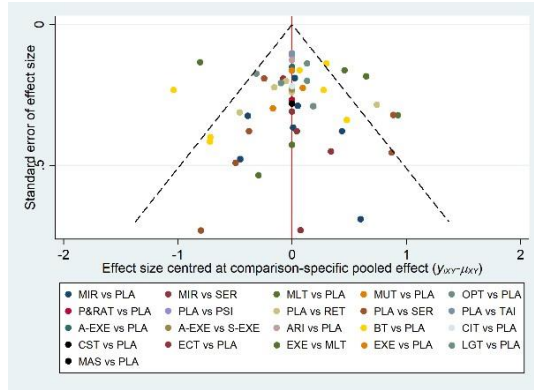

### B. Geriatric Depression Scale

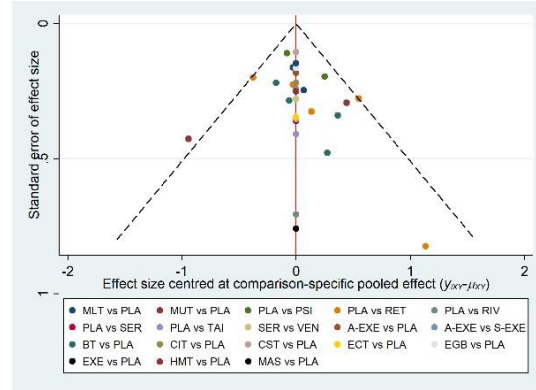

### C. Hamilton Depression Rating Scale

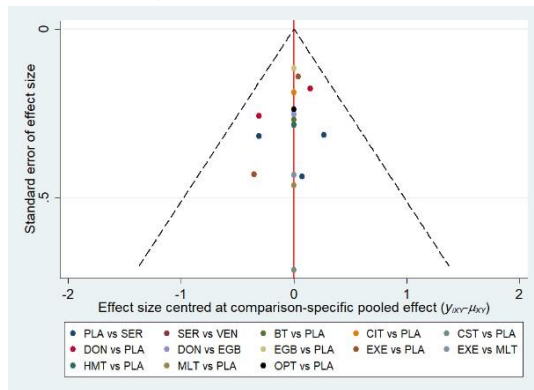

### D. Mini-Mental State Examination

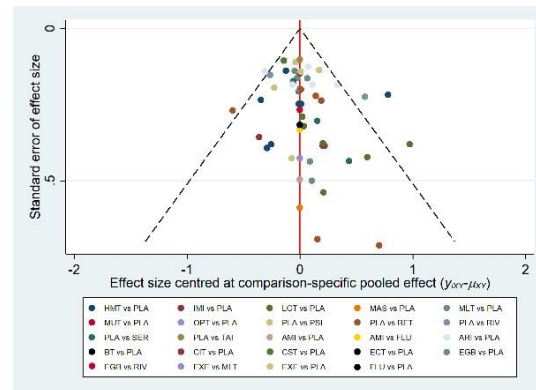

### E. Neuropsychiatric Inventory

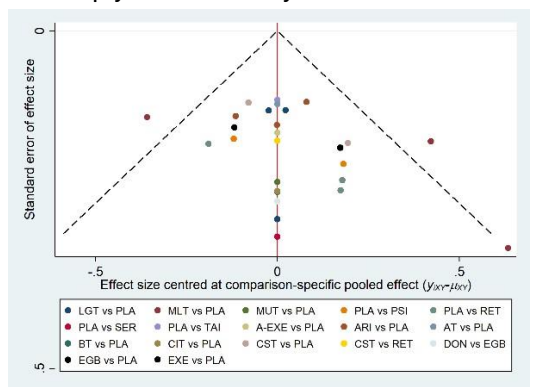

### F. Cohen-Mansfeld Agitation Inventory

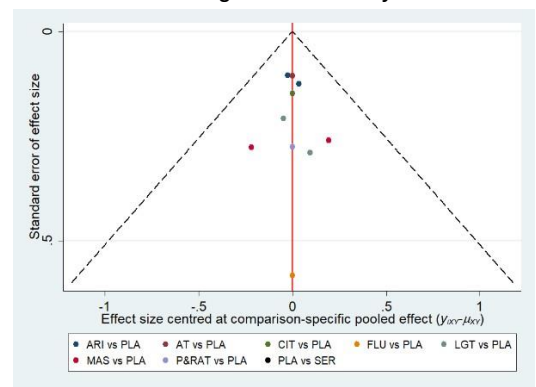

| Abbreviations                            |                           |                                     |
|------------------------------------------|---------------------------|-------------------------------------|
| AEXE = Aerobic Exercise;                 | EGB = Egb 761;            | OPT = Occupational Therapy;         |
| AMI = Amitriptyline;                     | EXE = Exercise;           | P/RAT = Pet/Robot-Assisted Therapy; |
| ARI = Aripiprazole;                      | FLU = Fluoxetine;         | PLA = Placebo;                      |
| AT = Analgesic Treatment;                | HMT = Hormone Therapy;    | PST = Psychosocial Therapy;         |
| BT = Behavioral Training;                | IMI = Imipramine;         | RET = Reminiscence Therapy;         |
| CIT = Citalopram;                        | LGT = Light therapy;      | RIV = Rivastigmine;                 |
| CST = Cognitive Stimulated Training;     | MAS = Massage;            | SEXE = Strength Exercise;           |
| DIS = Discontinuation of Antipsychotics; | MIR = Mirtazapine;        | SER = Sertraline;                   |
| DON = Donepezil;                         | MLT = Multidomain Therapy | TAI = Tai Chi;                      |
| ECT = Electrical Current Therapy;        | MUT = Music Therapy;      | VEN = Venlafaxine                   |
