# Supplementary material for: Comparative efficacy and acceptability of treatments for depressive symptoms in cognitive impairment: A systematic review and Bayesian network meta-analysis
Source: Frontiers journal article supplement (doi:10.3389/fnagi.2022.1037414), 2022-12-12

A. Cornell Scale for Depression

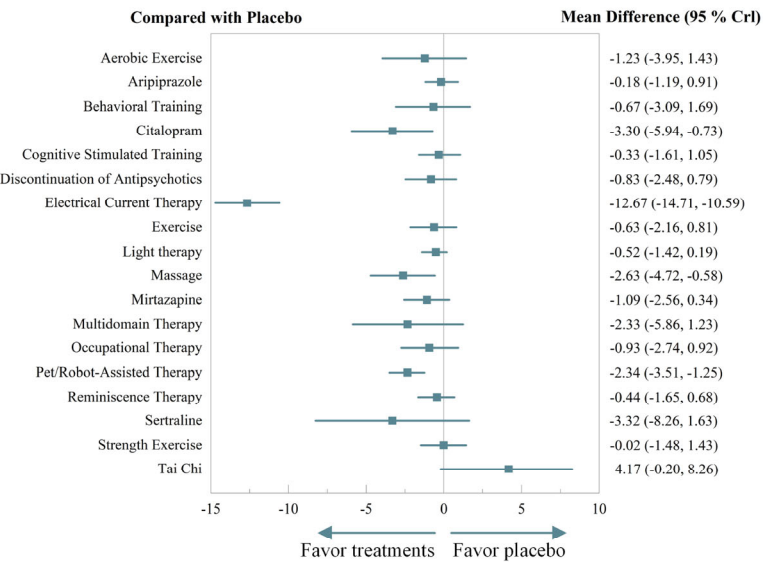

B. Geriatric Depression Scale

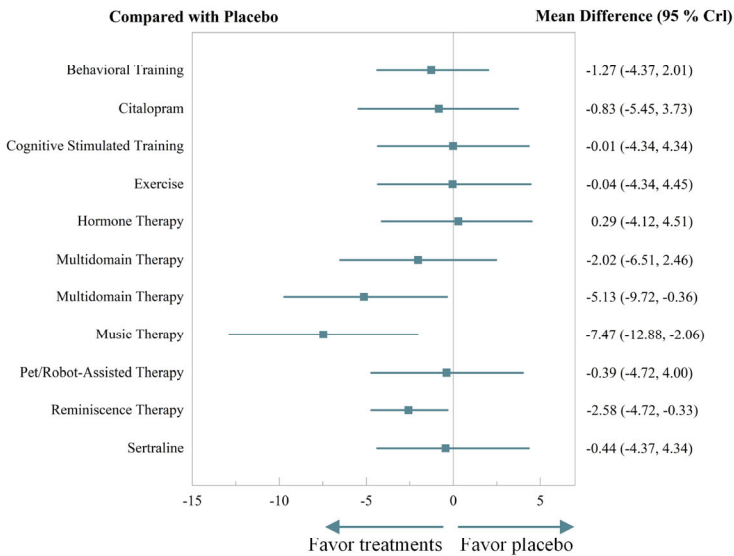

C. Hamilton Depression Rating Scale

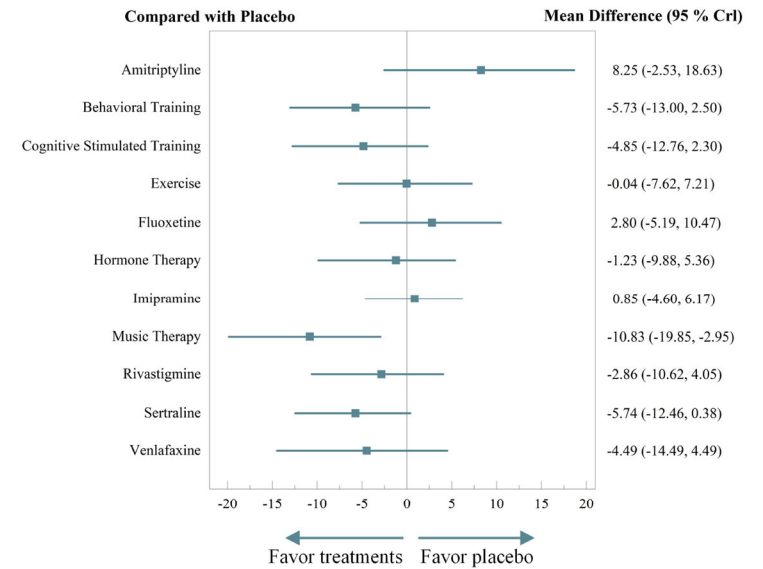

D. Mini-Mental State Examination

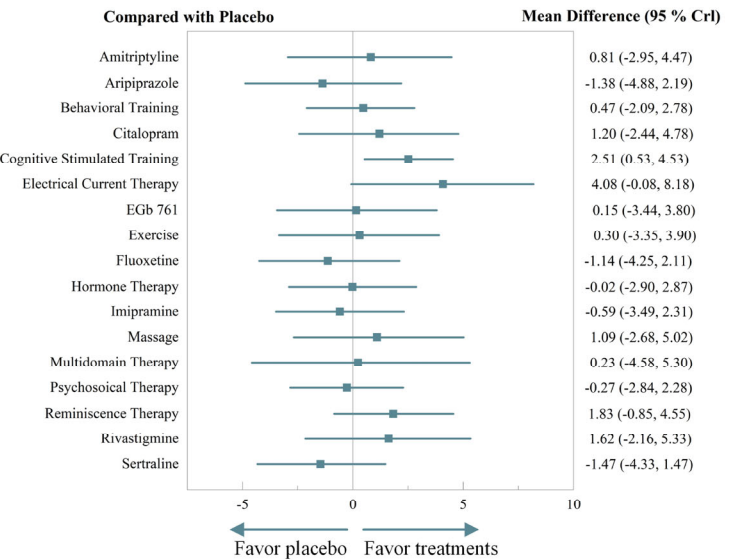

E. Neuropsychiatric Inventory

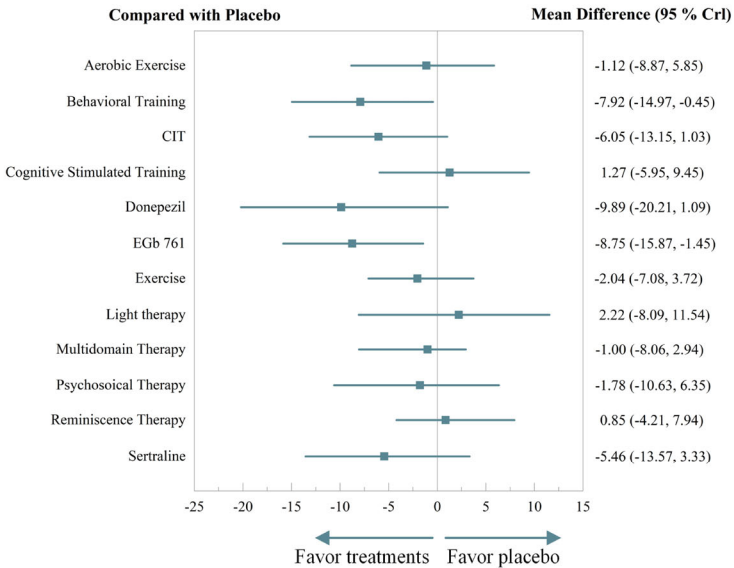

Supplement: Data_Sheet_1.zip [file Data_Sheet_1.zip]
