# Supplementary material for: Comparative efficacy and acceptability of treatments for depressive symptoms in cognitive impairment: A systematic review and Bayesian network meta-analysis
Source: Frontiers journal article supplement (doi:10.3389/fnagi.2022.1037414), 2022-12-12
Supplement: Data_Sheet_1.zip [file Data_Sheet_1.zip]

**A. Total adverse events**

|                    |                        |                   |                   |                      |
|--------------------|------------------------|-------------------|-------------------|----------------------|
| <b>Citalopram</b>  | 1.12 (0.07, 16.60)     | 0.45 (0.09, 2.07) | 0.79 (0.08, 6.41) | 11.96 (0.49, 769.16) |
| 0.89 (0.06, 13.75) | <b>Hormone Therapy</b> | 0.39 (0.04, 3.72) | 0.70 (0.04, 9.90) | 10.92 (0.30, 960.36) |
| 2.24 (0.48, 11.16) | 2.54 (0.27, 23.71)     | <b>Placebo</b>    | 1.78 (0.35, 7.61) | 5.98 (1.72, 26.34)   |
| 1.26 (0.16, 13.13) | 1.44 (0.10, 23.83)     | 0.56 (0.13, 2.88) | <b>Sertraline</b> | 15.72 (0.70, 923.60) |
| 0.08 (0.00, 2.06)  | 0.09 (0.00, 3.35)      | 0.17 (0.04, 0.58) | 0.06 (0.00, 1.44) | <b>Venlafaxine</b>   |

**B. Severe adverse events**

|                     |                   |                     |                   |                   |                    |
|---------------------|-------------------|---------------------|-------------------|-------------------|--------------------|
| <b>Aripiprazole</b> | 0.45 (0.12, 1.50) | 2.76 (0.14, 251.45) | 0.78 (0.33, 1.65) | 1.08 (0.30, 3.23) | 4.65 (0.48, 39.95) |
| 2.20 (0.67, 8.49)   | <b>EGb 761</b>    | 5.97 (0.30, 536.45) | 1.70 (0.66, 4.88) | 2.34 (0.62, 8.70) | 9.97 (1.04, 94.07) |
| 0.36 (0.00, 7.34)   | 0.17 (0.00, 3.38) | <b>Fluoxetine</b>   | 0.28 (0.00, 5.27) | 0.38 (0.00, 8.12) | 1.63 (0.01, 56.54) |
| 1.29 (0.61, 3.01)   | 0.59 (0.21, 1.53) | 3.55 (0.19, 287.01) | <b>Placebo</b>    | 1.38 (0.55, 3.13) | 5.90 (0.73, 42.97) |
| 0.93 (0.31, 3.31)   | 0.43 (0.12, 1.61) | 2.62 (0.12, 275.17) | 0.72 (0.32, 1.81) | <b>Sertraline</b> | 4.29 (0.66, 28.05) |
| 0.22 (0.03, 2.09)   | 0.10 (0.01, 0.96) | 0.61 (0.02, 92.43)  | 0.17 (0.02, 1.37) | 0.23 (0.04, 1.51) | <b>Venlafaxine</b> |

**C.Diarrhea**

|                     |                    |                    |                    |                    |
|---------------------|--------------------|--------------------|--------------------|--------------------|
| <b>Aripiprazole</b> | 0.76 (0.01, 42.08) | 0.93 (0.12, 7.11)  | 0.79 (0.13, 4.51)  | 0.99 (0.12, 6.65)  |
| 1.31 (0.02, 86.02)  | <b>Citalopram</b>  | 1.19 (0.03, 64.08) | 1.01 (0.03, 46.42) | 1.23 (0.03, 59.95) |
| 1.08 (0.14, 8.58)   | 0.84 (0.02, 37.70) | <b>EGb 761</b>     | 0.85 (0.30, 2.35)  | 1.07 (0.22, 3.97)  |
| 1.26 (0.22, 7.44)   | 0.99 (0.02, 39.61) | 1.17 (0.43, 3.33)  | <b>Placebo</b>     | 1.25 (0.42, 3.11)  |
| 1.01 (0.15, 8.62)   | 0.81 (0.02, 38.54) | 0.94 (0.25, 4.48)  | 0.80 (0.32, 2.41)  | <b>Sertraline</b>  |

**D. Headache**

|                       |                     |                        |                     |                     |                    |
|-----------------------|---------------------|------------------------|---------------------|---------------------|--------------------|
| <b>Aripiprazole</b>   | 0.22 (0.03, 1.53)   | 0.96 (0.07, 12.01)     | 0.53 (0.08, 3.04)   | 0.46 (0.05, 3.47)   | 0.05 (0.00, 1.32)  |
| 4.48 (0.66, 36.70)    | <b>EGb 761</b>      | 4.43 (0.58, 32.00)     | 2.36 (1.05, 5.49)   | 2.08 (0.55, 7.83)   | 0.24 (0.01, 3.90)  |
| 1.05 (0.08, 13.95)    | 0.23 (0.03, 1.71)   | <b>Hormone Therapy</b> | 0.53 (0.09, 3.36)   | 0.46 (0.06, 3.89)   | 0.05 (0.00, 1.42)  |
| 1.89 (0.33, 13.26)    | 0.42 (0.18, 0.96)   | 1.88 (0.30, 11.27)     | <b>Placebo</b>      | 0.88 (0.31, 2.46)   | 0.10 (0.00, 1.49)  |
| 2.16 (0.29, 19.50)    | 0.48 (0.13, 1.82)   | 2.15 (0.26, 16.99)     | 1.14 (0.41, 3.20)   | <b>Sertraline</b>   | 0.12 (0.00, 1.43)  |
| 18.55 (0.76, 1128.94) | 4.10 (0.26, 149.70) | 18.80 (0.70, 927.56)   | 9.74 (0.67, 329.46) | 8.39 (0.70, 257.80) | <b>Venlafaxine</b> |

**E. Nausea**

|                    |                    |                        |                    |                     |                    |                     |
|--------------------|--------------------|------------------------|--------------------|---------------------|--------------------|---------------------|
| <b>Citalopram</b>  | 1.00 (0.08, 11.43) | 3.82 (0.12, 245.63)    | 1.55 (0.22, 11.11) | 1.11 (0.09, 13.90)  | 2.50 (0.19, 28.81) | 6.90 (0.38, 131.62) |
| 1.00 (0.09, 13.09) | <b>EGb 761</b>     | 3.90 (0.15, 218.38)    | 1.64 (0.36, 7.75)  | 1.15 (0.13, 10.59)  | 2.78 (0.29, 22.04) | 7.12 (0.51, 100.01) |
| 0.26 (0.00, 8.42)  | 0.26 (0.00, 6.87)  | <b>Hormone Therapy</b> | 0.42 (0.01, 7.08)  | 0.31 (0.01, 8.22)   | 0.68 (0.01, 17.44) | 1.61 (0.03, 64.86)  |
| 0.64 (0.09, 4.57)  | 0.61 (0.13, 2.79)  | 2.36 (0.14, 95.87)     | <b>Placebo</b>     | 0.71 (0.15, 3.33)   | 1.68 (0.33, 7.10)  | 4.31 (0.51, 39.08)  |
| 0.90 (0.07, 10.55) | 0.87 (0.09, 7.44)  | 3.21 (0.12, 181.10)    | 1.41 (0.30, 6.67)  | <b>Rivastigmine</b> | 2.40 (0.24, 18.39) | 5.93 (0.41, 87.20)  |
| 0.40 (0.03, 5.19)  | 0.36 (0.05, 3.39)  | 1.46 (0.06, 87.51)     | 0.60 (0.14, 3.03)  | 0.42 (0.05, 4.15)   | <b>Sertraline</b>  | 2.61 (0.42, 19.69)  |
| 0.14 (0.01, 2.64)  | 0.14 (0.01, 1.97)  | 0.62 (0.02, 38.38)     | 0.23 (0.03, 1.97)  | 0.17 (0.01, 2.42)   | 0.38 (0.05, 2.39)  | <b>Venlafaxine</b>  |
