# Supplementary material for: Comparative efficacy and acceptability of treatments for depressive symptoms in cognitive impairment: A systematic review and Bayesian network meta-analysis
Source: Frontiers journal article supplement (doi:10.3389/fnagi.2022.1037414), 2022-12-12
Supplement: Data_Sheet_1.zip [file Data_Sheet_1.zip]

| Sensitivity and Heterogeneity Analysis |                     |          |          |          |        |                |
|----------------------------------------|---------------------|----------|----------|----------|--------|----------------|
|                                        | Model               | Dbar     | pD       | DIC      | Ratio  | I <sup>2</sup> |
| A. Cornell Scale for Depression        | Random-Effect Model | 104.6006 | 70.16961 | 174.7702 | 1.113  | 11%            |
|                                        | Fixed-Effect Model  | 108.7975 | 64.99007 | 173.7875 | 1.157  | 15%            |
| B. Geriatric Depression Scale          | Random-Effect Model | 32.2721  | 30.64489 | 62.91699 | 1.009  | 4%             |
|                                        | Fixed-Effect Model  | 40.48003 | 27.00095 | 67.48098 | 1.265  | 23%            |
| C. Hamilton Depression Rating Scale    | Random-Effect Model | 25.11853 | 25.0149  | 50.13343 | 0.9661 | 1%             |
|                                        | Fixed-Effect Model  | 24.64237 | 24.00841 | 48.65077 | 0.9478 | 0%             |
| D. Mini-Mental State Examination       | Random-Effect Model | 114.8771 | 100.7861 | 215.6632 | 0.9416 | 0%             |
|                                        | Fixed-Effect Model  | 160.7242 | 82.01038 | 242.7346 | 1.317  | 25%            |
| E. Neuropsychiatric Inventory          | Random-Effect Model | 60.40249 | 51.13602 | 111.5385 | 0.9742 | 0%             |
|                                        | Fixed-Effect Model  | 62.60487 | 48.07208 | 110.677  | 1.01   | 3%             |
| F. Cohen-Mansfeld Agitation Inventory  | Random-Effect Model | 19.73363 | 18.98012 | 38.71375 | 0.897  | 0%             |
|                                        | Fixed-Effect Model  | 20.38407 | 20.02735 | 40.41142 | 0.9265 | 0%             |
