# Supplementary material for: Comparative efficacy and acceptability of treatments for depressive symptoms in cognitive impairment: A systematic review and Bayesian network meta-analysis
Source: Frontiers journal article supplement (doi:10.3389/fnagi.2022.1037414), 2022-12-12
Supplement: Data_Sheet_1.zip [file Data_Sheet_1.zip]

| Treatment           | Study Number | Study                                         | Diagnosis           | Patients Number | Intervention       | Completed (%) | Gender (Female%) | Age, Mean(SD) | Duration | Baseline      |             |     |             |
|---------------------|--------------|-----------------------------------------------|---------------------|-----------------|--------------------|---------------|------------------|---------------|----------|---------------|-------------|-----|-------------|
|                     |              |                                               |                     |                 |                    |               |                  |               |          | MMSE          | CSDD        | GDS | NPI         |
| Analgesic Treatment | 1            | Husebo, Ballard et al. 2013 <sup>1</sup>      | Dementia            | 175             | Pain treatment     | 89.10%        | 74.90%           | 84.9 (7.0)    | 8 weeks  | 7.5 (6.4)     | -           | -   | 34.8 (21.9) |
|                     |              |                                               |                     | 177             | Placebo            | 80.20%        | 74.00%           | 86.5 (6.7)    |          | 8.4 (6.7)     | -           | -   | 31.4 (21.4) |
|                     | 2            | Husebo, Ballard et al. 2011 <sup>2</sup>      | Dementia            | 175             | Pain treatment     | 81.10%        | 75.00%           | 85.0          | 12 weeks | 7 (0-20)      | -           | -   | 32 (1-101)  |
|                     |              |                                               |                     | 177             | Placebo            | 85.90%        | 74.00%           | 87.0          |          | 8 (0-20)      | -           | -   | 29 (0-97)   |
| Aripiprazole        | 3            | Streim, Porsteinsson et al. 2008 <sup>3</sup> | Dementia            | 131             | Aripiprazole 2 mg  | 99.20%        | 56.40%           | 83.0          | 10 weeks | 17.75 (9.725) | 8.72 (4.71) | -   | -           |
|                     |              |                                               |                     | 125             | Placebo            | 96.80%        | 62.40%           | 83.0          |          | 13.26 (4.44)  | 9.18 (4.4)  | -   | -           |
|                     | 4            | Mintzer, Tune et al. 2007 <sup>4</sup>        | Dementia            | 118             | Aripiprazole 2 mg  | 65.00%        | 68.64%           | 83.0          | 10 weeks | 13.0 (8.0)    | -           | -   | -           |
|                     |              |                                               |                     | 122             | Aripiprazole 5mg   | 60.00%        | 62.30%           | 82.4          |          | 12.4 (8.2)    | -           | -   | -           |
|                     |              |                                               |                     | 126             | Aripiprazole 10mg  | 55.00%        | 60.30%           | 82.3          |          | 12.2 (8.0)    | -           | -   | -           |
|                     |              |                                               |                     | 121             | Placebo            | 54.00%        | 67.77%           | 82.2          |          | 11.7 (8.2)    | -           | -   | -           |
|                     | 5            | De Deyn, Jeste et al. 2005 <sup>5</sup>       | Alzheimer's disease | 106             | Aripiprazole 10 mg | 83.00%        | 72.00%           | 55-95         | 10 weeks | 14.35         | -           | -   | 39.82       |

|                     |    |                                              |                     |     |                                      |         |         |             |          |             |             |              |       |
|---------------------|----|----------------------------------------------|---------------------|-----|--------------------------------------|---------|---------|-------------|----------|-------------|-------------|--------------|-------|
|                     |    |                                              |                     | 102 | Placebo                              | 82.00%  |         |             |          | 14.13       | -           | -            | 40.08 |
| Behavioral training | 6  | Travers 2016 <sup>6</sup>                    | Dementia            | 10  | Behavioral training                  | 100.00% | 80.00%  | 87.2 (7.7)  | 10 weeks | 19.5 (3.87) | -           | 4 (4-7)      | -     |
|                     |    |                                              |                     | 8   | Control care                         | 100.00% | 100.00% | 85.5 (10.9) |          | 16.13 (3.7) | -           | 5 (4.0-7.25) | -     |
|                     | 7  | Linda, Logsdon et al. 1997 <sup>7</sup>      | Alzheimer's disease | 23  | Behavioral training -pleasant events | 100.00% | 70.00%  | 72.8 (8.2)  | 9 weeks  | 15.8 (7.8)  | 14.8 (4.2)  | -            | -     |
|                     |    |                                              |                     | 19  | Behavioral training -problem solving | 100.00% | 26.00%  | 78.5 (7.9)  |          | 15.7 (7.4)  | 15.1 (3.5)  | -            | -     |
|                     |    |                                              |                     | 10  | Typical control care                 | 100.00% | 60.00%  | 79.5 (6.9)  |          | 16.8 (5.4)  | 13.9 (4.6)  | -            | -     |
|                     |    |                                              |                     | 20  | Wait list control care               | 100.00% | 75.00%  | 76.8 (8.2)  |          | 17.9 (7.9)  | 14.0 (4.2)  | -            | -     |
|                     | 8  | Lichtenberg, Kemp-Havican et al <sup>8</sup> | Dementia            | 9   | Behavioral training                  | 100.00% | 90.00%  | 84.8 (4.9)  | 12 weeks | -           | 13.1 (7.0)  | 3.6 (3.2)    | -     |
|                     |    |                                              |                     | 11  | Control care                         | 100.00% | 90.00%  | 85.0 (5.1)  |          | -           | 11.3 (5.8)  | 3.6 (3.2)    | -     |
|                     | 9  | Lam, Lui et al. 2010 <sup>9</sup>            | Dementia            | 37  | Behavioral training                  | 83.70%  | 67.60%  | 83.1(6.9)   | 8 weeks  | 13.6(4.0)   | 4.43 (3.1)  | -            | -     |
|                     |    |                                              |                     | 37  | Control care                         | 70.30%  | 81.10%  | 83.8 (7.0)  |          | 13.9(4.8)   | 3.43 (4.24) | -            | -     |
|                     | 10 | Verkaik, Francke et al. 2011 <sup>10</sup>   | Dementia            | 62  | Behavioral training                  | 87.10%  | 83.90%  | 83.4 (7.2)  | 11 weeks | -           | -           | -            | -     |

|                               |    |                                              |                      |     |                               |         |        |                 |          |                 |              |                |                 |
|-------------------------------|----|----------------------------------------------|----------------------|-----|-------------------------------|---------|--------|-----------------|----------|-----------------|--------------|----------------|-----------------|
|                               |    |                                              |                      | 35  | Control care                  | 80.00%  | 80.00% | 84.1 (7.1)      |          | -               | -            | -              | -               |
|                               | 11 | Tse, Lau et al. 2018 <sup>11</sup>           | Dementia             | 29  | Behavioral training           | 100.00% | 71.00% | 83.3 (7.5)      | 8 weeks. | 21.58<br>(2.75) | -            | 5.67<br>(2.05) | 19.00<br>(4.32) |
|                               |    |                                              |                      | 24  | Control care                  | 100.00% | 76.90% | 87.6 (8.0)      |          | 19.49<br>(3.93) | -            | 8.40<br>(3.22) | 17.38<br>(6.32) |
|                               | 12 | Todri, Todri et al. 2019 <sup>12</sup>       | Alzheimer's disease  | 45  | Behavioral training           | 100.00% | 62.20% | 81.8 (4.8)      | 6 months | -               | -            | -              | -               |
|                               |    |                                              |                      | 45  | Control care                  | 100.00% | 48.90% | 80.4<br>(5.59)  |          | -               | -            | -              | -               |
|                               | 13 | Teri, Gibbons et al. 2003 <sup>13</sup>      | Alzheimer's disease  | 76  | Behavioral training           | 59.00%  | 37.00% | 78 (6)          | 3 months | 17.6<br>(6.8)   | 5.8<br>(4.5) | -              | -               |
|                               |    |                                              |                      | 77  | Control care                  | 57.00%  | 45.00% | 78 (8)          |          | 15.9<br>(7.4)   | 5.7<br>(3.9) | -              | -               |
|                               | 14 | Woods, Thorgrimsen et al. 2006 <sup>14</sup> | Dementia             | 101 | Cognitive stimulation therapy | 100.00% | 78.60% | 85.3 (7.0)      | 8 weeks  | 14.4<br>(3.8)   | 5.5<br>(4.9) | -              | -               |
|                               |    |                                              |                      | 100 | Control care                  | 100.00% |        |                 |          |                 |              | -              | -               |
|                               | 15 | Yi-Xuan, Niu et al. 2010 <sup>15</sup>       | Alzheimer's disease  | 16  | Cognitive stimulation therapy | 100.00% | 12.50% | 80.56<br>(4.23) | 10 weeks | 16.93<br>(3.02) | -            | -              | 14.06<br>(5.69) |
|                               |    |                                              |                      | 16  | Control care                  | 100.00% | 31.30% | 79.13<br>(4.38) |          | 17.31<br>(3.24) | -            | -              | 13.69<br>(4.60) |
| Cognitive stimulation therapy | 16 | Buschert, Friese et al. 2011 <sup>16</sup>   | Cognitive impairment | 12  | Cognitive stimulation therapy | 83.33%  | 50.00% | 71.8 (8.6)      | 6 months | 28.1<br>(1.5)   | -            | -              | -               |

|  |    |                                               |                        |    |                                     |         |        |                 |          |                 |              |               |   |
|--|----|-----------------------------------------------|------------------------|----|-------------------------------------|---------|--------|-----------------|----------|-----------------|--------------|---------------|---|
|  |    |                                               |                        | 12 | Control care                        | 100.00% | 50.00% | 70.7 (5.7)      |          | 26.8<br>(1.5)   | -            | -             | - |
|  |    |                                               | Alzheimer's<br>disease | 8  | Cognitive<br>stimulation<br>therapy | 100.00% | 50.00% | 77.3 (7.6)      |          | 24.5<br>(1.6)   | -            | -             | - |
|  |    |                                               |                        | 7  | Control care                        | 100.00% | 57.10% | 74.2 (9.0)      |          | 25.3<br>(1.5)   | -            | -             | - |
|  | 17 | Maci, Pira et al. 2012 <sup>17</sup>          | Alzheimer's<br>disease | 7  | Cognitive<br>stimulation<br>therapy | 100.00% | 75.00% | 75 (12.3)       | 3 months | 17.5<br>(2.7)   | 9.0<br>(5.5) | -             | - |
|  |    |                                               |                        | 7  | Control care                        | 100.00% | 75.00% | 70.3 (5.8)      | 3 months | 18.2<br>(2.9)   | 9.5<br>(2.9) | -             | - |
|  | 18 | Bergamaschi, Arcara et al. 2013 <sup>18</sup> | Alzheimer's<br>disease | 16 | Cognitive<br>stimulation<br>therapy | 100.00% | -      | 78.19<br>(5.50) | 1 year   | 20.25<br>(2.95) | -            | -             | - |
|  |    |                                               |                        | 16 | Control care                        | 100.00% |        | 77.72<br>(5.06) |          | 21.94<br>(2.01) | -            | -             | - |
|  | 19 | Jha, Jan et al. 2013 <sup>19</sup>            | Dementia               | 24 | Cognitive<br>stimulation<br>therapy | 100.00% | 70.83% | 78.47 (8)       | 6 months | 21 (6)          | 6.4<br>(2.6) | -             | - |
|  |    |                                               |                        | 24 | Control care                        | 100.00% | 62.50% | 79 (7.6)        |          | 23 (5)          | 6.9 (3)      | -             | - |
|  | 20 | Stanley, Calleo et al. 2013 <sup>20</sup>     | Dementia               | 16 | Cognitive<br>stimulation<br>therapy | 68.75%  | 62.50% | 77.6<br>(10.54) | 3 months | -               | -            | 9.4<br>(7.19) | - |

|  |    |                                                 |                     |     |                                  |         |        |                 |          |                 |                |                 |                  |
|--|----|-------------------------------------------------|---------------------|-----|----------------------------------|---------|--------|-----------------|----------|-----------------|----------------|-----------------|------------------|
|  |    |                                                 |                     | 16  | Control care                     | 93.75%  | 56.30% | 79.6<br>(8.97)  |          | -               | -              | 10.7<br>(6.457) | -                |
|  | 21 | Orgeta, Leung et al. 2015 <sup>21</sup>         | Dementia            | 180 | Cognitive stimulation therapy    | 75.00%  | 46.00% | 78.4 (7.3)      | 26weeks  | 21.12<br>(4.48) | -              | 3.14<br>(2.64)  | 11.21<br>(13.96) |
|  |    |                                                 |                     | 176 | Control care                     | 79.00%  | 50.00% | 78 (7.7)        |          | 21.33<br>(4.11) | -              | 3.16<br>(3.15)  | 10.99<br>(11.98) |
|  | 22 | Amieva, Robert et al. 2015 <sup>22</sup>        | Alzheimer's disease | 170 | Cognitive stimulation therapy    | 88.80%  | 58.20% | 78.5 (7.2)      | 3 months | 21.5<br>(3.2)   | -              | -               | 16.3<br>(12.6)   |
|  |    |                                                 |                     | 172 | Reminiscence therapy             | 87.20%  | 62.80% | 78.8 (6.9)      |          | 21.1<br>(3.1)   | -              | -               | 15.8<br>(12.9)   |
|  |    |                                                 |                     | 157 | Cognitive rehabilitation therapy | 91.70%  | 58.60% | 78.9 (6.2)      |          | 21.6<br>(3.0)   | -              | -               | 16.0<br>(16.1)   |
|  |    |                                                 |                     | 154 | Control care                     | 91.60%  | 58.40% | 78.7<br>(6.5)   |          | 21.6<br>(3.3)   | -              | -               | 17.5<br>(15.2)   |
|  | 23 | Capotosto, Belacchi et al. 2017 <sup>23</sup>   | Dementia            | 20  | Cognitive stimulation therapy    | 100.00% | 75.00% | 88.25<br>(5.15) | 7 weeks  | 18.30<br>(3.14) | 2.90<br>(2.15) | -               | 22.1<br>(8.17)   |
|  |    |                                                 |                     | 19  | Control care                     | 100.00% | 63.20% | 86.5<br>2(5.55) |          | 18.20<br>(3.63) | 2.63<br>(2.52) | -               | 19.32<br>(7.23)  |
|  | 24 | Churcher Clarke, Chan et al. 2017 <sup>24</sup> | Dementia            | 20  | Cognitive Mindfulness therapy    | 100.00% | 60.00% | 81.30<br>(9.29) | 1week    | -               | 6.80<br>(4.35) | -               | -                |

|                        |    |                                              |                         |    |                                                   |         |        |                 |          |                 |                 |                 |                |
|------------------------|----|----------------------------------------------|-------------------------|----|---------------------------------------------------|---------|--------|-----------------|----------|-----------------|-----------------|-----------------|----------------|
|                        |    |                                              |                         | 11 | Control care                                      | 72.70%  | 27.30% | 79.36<br>(9.91) |          | -               | 8.09<br>(6.06)  | -               | -              |
| Current<br>Stimulation | 25 | Khedr et al., 2019 <sup>25</sup>             | Alzheimer's<br>disease  | 23 | Transcranial<br>Direct Current<br>Stimulation     | 100.00% | 43.50% | 64.22<br>(3.64) | 2 weeks  | -               | 17.47<br>(4.75) | -               | -              |
|                        |    |                                              |                         | 23 | Control care                                      | 91.30%  | 38.10% | 65.23<br>(4.52) |          | -               | 16.90<br>(3.78) | -               | -              |
|                        | 26 | Luijpen, Swaab et al. 2004 <sup>26</sup>     | Cognitive<br>Impairment | 17 | Transcutaneous<br>Electrical Nerve<br>Stimulation | 100.00% | 88.20% | 88.06           | 4 weeks  | 20.24<br>(3.70) | -               | 7.94<br>(3.25)  | -              |
|                        |    |                                              |                         | 17 | Control care                                      | 100.00% | 64.70% | 87.35           |          | 23.41<br>(2.35) | -               | 10.35<br>(5.68) | -              |
| Citalopram             | 27 | Nyth and Gottfries 1990 <sup>27</sup>        | Dementia                | 44 | Citalopram<br>30mg/day                            | 59.10%  | 77.50% | -               | 6 weeks  | -               | -               | -               | -              |
|                        |    |                                              |                         | 45 | Placebo                                           | 64.40%  |        |                 |          |                 | -               | -               | -              |
|                        | 28 | Nyth, Gottfries et al. 1992 <sup>28</sup>    | Dementia                | 88 | Citalopram<br>10mg/day                            | 68.10%  | 67.00% | 76.14           | 6 weeks  | -               | -               | -               | -              |
|                        |    |                                              |                         | 45 | Placebo                                           | 71.10%  | 73.30% | 77.7            |          | -               | -               | -               | -              |
|                        | 29 | An, Choi et al. 2017 <sup>29</sup>           | Alzheimer's<br>disease  | 41 | Citalopram<br>15mg/day                            | 65.90%  | 88.90% | 74.33<br>(7.47) | 12 weeks | 19.04<br>(4.26) | 11.11<br>(7.13) | 9.56<br>(3.04)  | -              |
|                        |    |                                              |                         | 43 | Placebo                                           | 76.70%  | 72.70% | 75.85<br>(6.73) |          | 18.70<br>(4.92) | 11.67<br>(7.82) | 9.2<br>1(2.99)  | -              |
|                        | 30 | Porsteinsson, Drye et al. 2014 <sup>30</sup> | Alzheimer's<br>disease  | 94 | Citalopram<br>30mg/day                            | 91.50%  | 47.00% | 78 (9)          | 9 weeks  | 17.0<br>(6.2)   | -               | -               | 37.3<br>(17.5) |

|           |    |                                                  |                      |     |               |         |        |                 |          |               |   |              |                |
|-----------|----|--------------------------------------------------|----------------------|-----|---------------|---------|--------|-----------------|----------|---------------|---|--------------|----------------|
|           |    |                                                  |                      | 92  | Placebo       | 90.20%  | 45.00% | 79 (8)          |          | 14.4<br>(6.9) | - | -            | 37.3<br>(17.7) |
| Donepezil | 31 | Devanand, Pelton et al. 2018 <sup>31</sup>       | Cognitive impairment | 31  | Donepezil     | 100.00% | 53.33% | 67.10<br>(7.66) | 16 weeks | -             | - | -            | -              |
|           |    |                                                  |                      | 30  | Placebo       | 100.00% | 48.39% | 72.39<br>(8.90) |          | -             | - | -            | -              |
|           | 32 | Yancheva, Ihl et al. 2009 <sup>32</sup>          | Alzheimer's disease  | 31  | EGB 761       | 96.80%  | 54.80% | 69 (8)          | 22 weeks | -             | - | -            | 18.9<br>(7.1)  |
|           |    |                                                  |                      | 32  | Donepezil     | 90.60%  | 84.40% | 66 (8)          |          | -             | - | -            | 21.5<br>(9.7)  |
|           | 33 | Reynolds, Butters et al. 2011 <sup>33</sup>      | Cognitive impairment | 67  | Donepezil     | 62.90%  | 73.13% | 73.1 (6.5)      | 16 weeks | 28.5<br>(1.4) | - | -            | -              |
|           |    |                                                  |                      | 63  | Placebo       | 77.80%  | 81.00% | 73.9 (5.8)      |          | 28.4<br>(1.4) | - | -            | -              |
| EGB 761   | 34 | Van Dongen, Van Rossum et al. 2000 <sup>34</sup> | Dementia             | 84  | EGB 761 160mg | 100.00% | 85.00% | 82.8 (4.9)      | 24 weeks | 18.3<br>(4.8) | - | 2.5<br>(2.2) | -              |
|           |    |                                                  |                      | 82  | EGB 761 240mg | 100.00% | 85.00% | 83.3 (5.3)      |          | 18.4<br>(4.2) | - | 2.5<br>(2.4) | -              |
|           |    |                                                  |                      | 48  | Placebo       | 100.00% | 81.00% | 82.6 (5.7)      |          | 18.5<br>(4.5) | - | 3.0<br>(2.0) | -              |
|           | 35 | Napryeyenko, Sonnik et al. 2009 <sup>35</sup>    | Alzheimer's disease  | 104 | EGB 761 240mg | 100.00% | 67.00% | 66 (8)          | 22 weeks | -             | - | -            | 19.6<br>(8.4)  |
|           |    |                                                  |                      | 110 | Placebo       | 100.00% | 71.00% | 64 (8)          |          | -             | - | -            | 20.1<br>(8.6)  |
|           |    |                                                  | Vascular Disease     | 94  | EGB 761 240mg | 100.00% | 78.00% | 63 (8)          |          | -             | - | -            | 23.2<br>(10.4) |

|          |    |                                               |                     |     |                   |         |        |                 |           |                 |                |               |                 |
|----------|----|-----------------------------------------------|---------------------|-----|-------------------|---------|--------|-----------------|-----------|-----------------|----------------|---------------|-----------------|
|          |    |                                               |                     | 87  | Placebo           | 100.00% | 74.00% | 63 (9)          |           | -               | -              | -             | 23.6<br>(11.2)  |
|          | 36 | Kanowski and Hoerr 2003 <sup>36</sup>         | Alzheimer's disease | 106 | EGB 761 240mg     | 74.50%  | 68.00% | 72 (10)         | 24 weeks  | 21.6<br>(2.6)   | -              | -             | -               |
|          |    |                                               |                     | 99  | Placebo           | 79.80%  | 71.00% | 72 (10)         |           | 21.5<br>(2.4)   | -              | -             | -               |
|          | 37 | Napryeyenko and Borzenko 2007 <sup>37</sup>   | Dementia            | 198 | EGB 761 240mg     | 72.00%  | 72.00% | 65 (8)          | 22 weeks  | -               | -              | -             | 21.3<br>(9.5)   |
|          |    |                                               |                     | 197 | Placebo           | 72.00%  | 72.00% | 63 (8)          |           | -               | -              | -             | 21.6<br>(9.9)   |
|          | 38 | Liu, Lee et al. 2020 <sup>38</sup>            | Dementia            | 35  | Strength-exercise | 85.70%  | 20.00% | 86.77<br>(6.99) | 4 weeks   | 22.7<br>(4.28)  | -              | 0.4<br>(0.68) |                 |
| Exercise |    |                                               |                     | 34  | Aerobic-exercise  | 91.20%  | 16.13% | 84.68<br>(6.74) |           | 23.87<br>(4.65) | -              | 0.4<br>(0.68) | -               |
|          | 39 | Rolland, Pillard et al. 2007 <sup>39</sup>    | Alzheimer's disease | 67  | Combined Exercise | 89.60%  | 71.70% | 82.8 (7.8)      | 6 months  | 9.7 (6.8)       | -              | -             | 10.7<br>(6.9)   |
|          |    |                                               |                     | 67  | Control           | 85.10%  | 79.10% | 83.1 (7.0)      |           | 7.9 (6.4)       | -              | -             | 11.4(7.7)       |
|          | 40 | Bostrom, Conradsson et al. 2016 <sup>40</sup> | Dementia            | 93  | Combined Exercise | 93.00%  | 80.60% | 84.4 (6.2)      | 4 months  | 15.4<br>(3.4)   | -              | -             | 15.2<br>(15.8)  |
|          |    |                                               |                     | 93  | Control           | 90.00%  | 81.70% | 85.9 (7.8)      |           | 14.4<br>(3.5)   | -              | -             | 14.4<br>(12.6)  |
|          | 41 | Cancela, Ayan et al. 2016 <sup>41</sup>       | Dementia            | 73  | Aerobic-exercise  | 70.00%  | 43.80% | 80.63<br>(8.32) | 15 months | -               | 6.31<br>(5.07) | -             | 9.70<br>(9.45)  |
|          |    |                                               |                     | 116 | Control           | 54.30%  | 81.00% | 82.90<br>(7.42) |           | -               | 6.71<br>(6.48) | -             | 11.32<br>(5.35) |



|  |    |                                           |                      |     |                               |        |        |              |           |            |           |             |           |
|--|----|-------------------------------------------|----------------------|-----|-------------------------------|--------|--------|--------------|-----------|------------|-----------|-------------|-----------|
|  | 42 | Hoffmann, Sobol et al. 2016 <sup>42</sup> | Alzheimer's disease  | 107 | Combined Exercise             | 95.30% | 47.70% | 69.8 (7.4)   | 16 weeks  | 23.8 (3.4) | -         | -           | 10 (10.8) |
|  |    |                                           |                      | 93  | Control                       | 94.62% | 38.70% | 71.3 (7.3)   |           | 24.1 (3.8) | -         | -           | 9.4 (9.7) |
|  | 43 | Chen, Kuo et al. 2017 <sup>43</sup>       | Dementia             | 75  | Combined Exercise             | 86.70% | 58.50% | 80.7 (8.0)   | 15 months | 12.1 (3.9) | 3.2 (2.4) | -           | -         |
|  |    |                                           |                      | 75  | Control                       | 82.70% | 54.80% | 81.6 (6.7)   |           | 11.0 (4.8) | 2.6 (2.9) | -           | -         |
|  | 44 | Morris, Vidoni et al. 2017 <sup>44</sup>  | Alzheimer's disease  | 39  | Aerobic-exercise              | 94.90% | 43.20% | 74.4 (6.7)   | 26 weeks  | 25.8 (3.3) | 8.6 (5.1) | -           | -         |
|  |    |                                           |                      | 37  | Strength-exercise             | 91.90% | 57.70% | 71.4 (8.4)   |           | 25.0 (3.2) | 7.4 (3.8) | -           | -         |
|  | 45 | Henskens, Nauta et al. 2018 <sup>45</sup> | Dementia             | 21  | Multidomain interventions     | 85.70% | 90.50% | 86.05 (5.86) | 6 months  | -          | -         | 5.19 (0.84) | -         |
|  |    |                                           |                      | 22  | Exercise                      | 72.70% | 77.30% | 85.14 (4.64) |           | -          | -         | 4.45 (1.71) | -         |
|  |    |                                           |                      | 22  | Control                       | 72.70% | 77.30% | 84.73 (4.55) |           | -          | -         | 4.57 (2.04) | -         |
|  | 46 | Song and Yu 2019 <sup>46</sup>            | Cognitive impairment | 60  | Aerobic-exercise              | 80.00% | 80.00% | 76.22 (5.76) | 16 weeks  | -          | -         | 5.33 (3.48) | -         |
|  |    |                                           |                      | 60  | Control care                  | 78.30% | 70.00% | 75.33 (6.78) |           | -          | -         | 5.67 (3.70) | -         |
|  | 47 | Lam, Chan et al. 2015 <sup>47</sup>       | Cognitive impairment | 145 | Cognitive stimulation therapy | 79.00% | 79.30% | 74.4(6.4)    | 12 months | 25.7 (2.4) | 0.6 (2.2) | -           | -         |

|                 |    |                                                   |                      |     |                                        |         |         |            |           |               |              |                |                |
|-----------------|----|---------------------------------------------------|----------------------|-----|----------------------------------------|---------|---------|------------|-----------|---------------|--------------|----------------|----------------|
|                 |    |                                                   |                      | 147 | Physical Exercise                      | 78.00%  | 76.90%  | 75.5(6.7)  |           | 25.8<br>(2.3) | 0.7<br>(2.6) | -              | -              |
| Tai Chi         | 48 | Cheng, Chow et al. 2012 <sup>48</sup>             | Dementia             | 12  | Tai Chi                                | 100.00% | 50.00%  | 81.0 (7.7) | 6months   | -             | -            | 9.25<br>(2.14) | -              |
|                 |    |                                                   |                      | 12  | Control care                           | 100.00% | 75.00%  | 82.5 (7.1) |           | -             | -            | 9.08<br>(2.11) | -              |
|                 | 49 | Lam, Chau et al. 2012 <sup>49</sup>               | Cognitive impairment | 218 | Tai Chi                                | 77.52%  | 78.00%  | 78.3 (6.6) | 12 months | 24.3<br>(2.9) | 0.8<br>(1.8) | -              | 1.3 (2.2)      |
|                 |    |                                                   |                      | 171 | Exercise                               | 53.80%  | 73.10%  | 77.2 (6.3) |           | 24.7<br>(3.0) | 0.8<br>(1.6) | -              | 1.2 (2.4)      |
| Hormone Therapy | 50 | Wang, Liao et al. 2000 <sup>50</sup>              | Alzheimer's disease  | 25  | Estrogen                               | 96.00%  | 100.00% | 72.6 (9.1) | 12 weeks  | 16.1<br>(4.3) | -            | -              | -              |
|                 |    |                                                   |                      | 25  | Placebo                                | 92.00%  | 100.00% | 71.0 (9.1) |           | 16.2<br>(4.2) | -            | -              | -              |
|                 | 51 | Valen-Sendstad, Engedal et al. 2010 <sup>51</sup> | Alzheimer's disease  | 33  | 1mg estradiol;<br>0.5mg norethisterone | 79.00%  | 100.00% | 81.0 (5.7) | 12 months | 22.0<br>(4.3) | -            | 4.2<br>(0.6)   | -              |
|                 |    |                                                   |                      | 32  | Placebo                                | 72.00%  | 100.00% | 81.0 (4.5) |           | 21.8<br>(3.9) | -            | 4.4<br>(0.6)   | -              |
| Light therapy   | 52 | Dowling, Graf et al. 2007 <sup>52</sup>           | Alzheimer's disease  | 29  | Morning light                          | -       | 81.40%  | 84 (10)    | 11 weeks  | -             | -            | -              | 29.4<br>(20.7) |
|                 |    |                                                   |                      | 24  | Afternoon light                        |         |         |            |           | -             | -            | -              | 27.0<br>(15.7) |
|                 |    |                                                   |                      | 17  | Control care                           |         |         |            |           | -             | -            | -              | 24.1<br>(15.8) |

|                           |    |                                                        |                      |    |                          |                |         |              |           |            |              |            |             |
|---------------------------|----|--------------------------------------------------------|----------------------|----|--------------------------|----------------|---------|--------------|-----------|------------|--------------|------------|-------------|
|                           | 53 | Riemersma-Van Der Lek, Swaab et al. 2008 <sup>53</sup> | Dementia             | 49 | Light therapy            | 95.9/87.8/67.3 | 91.80%  | 85.8 (5.5)   | 12 months | 14.5 (6.2) | 7.4 (6.9)    | -          | -           |
|                           |    |                                                        |                      | 45 | Placebo                  | 88.9/68.9/48.9 | 88.90%  |              |           | 14.3 (7)   | 7.6 (5.1)    | -          | -           |
|                           | 54 | Burns, Allen et al. 2009 <sup>54</sup>                 | Dementia             | 22 | Light therapy            | 100.00%        | 73.00%  | 84.5 (1.7)   | 8 weeks   | 6.9 (5.3)  | 10.1 (5.2)   | -          | -           |
|                           |    |                                                        |                      | 40 | Control care             | 87.50%         |         |              |           | -          | 21.3 (3.4)   | -          | -           |
| Massage                   | 55 | Yang, Wang et al. 2016 <sup>55</sup>                   | Dementia             | 29 | Massage (Aromatherapy)   | 93.10%         | 65.50%  | 83.34 (6.41) | 9 weeks   | -          | 12.89 (8.37) | -          | -           |
|                           |    |                                                        |                      | 30 | Control care             | 96.70%         | 56.70%  | 80.67 (7.44) |           | -          | 5.48 (4.37)  | -          | -           |
|                           | 56 | Lanza, Centonze et al. 2018 <sup>56</sup>              | Alzheimer's disease  | 6  | Massage (Shiatsu)        | 100.00%        | 83.30%  | 77 (8)       | 10 months | 17.5 (0.5) | -            | 13(2)      | -           |
|                           |    |                                                        |                      | 6  | Control care             | 100.00%        | 100.00% | 80 (7)       |           | 16.9 (0.7) | -            | 13 (1.0)   | -           |
|                           | 57 | Moyle, Cooke et al. 2014 <sup>57</sup>                 | Dementia             | 26 | Foot Massage             | 96.20%         | 66.30%  | 86.5 (7.13)  | 3 weeks   | -          | -            | -          | -           |
|                           |    |                                                        |                      | 29 | Control care             | 96.60%         |         |              |           | -          | -            | -          | -           |
| Multidomain interventions | 58 | Baldwin, Pratt et al. 2004 <sup>58</sup>               | Cognitive impairment | 77 | Multidomain intervention | 76.60%         | 70.10%  | 80.6 (7.2)   | 8 weeks   | 18.2 (6.4) | -            | 14.4 (6.8) | -           |
|                           |    |                                                        |                      | 76 | Control care             | 80.30%         | 57.90%  | 80.0 (7.5)   |           | 18.8 (6.9) | -            | 14.0 (6.6) | -           |
|                           | 59 | Callahan, Boustani et al. 2006 <sup>59</sup>           | Alzheimer's disease  | 84 | Collaborative Care       | 76.20%         | 46.40%  | 77.4 (5.9)   | 1 year    | 18.6 (5.9) | 4.4 (4.9)    | -          | 10.5 (15.3) |

|  |    |                                           |                         |     |                                                  |         |        |                |              |                 |                |                 |                  |
|--|----|-------------------------------------------|-------------------------|-----|--------------------------------------------------|---------|--------|----------------|--------------|-----------------|----------------|-----------------|------------------|
|  |    |                                           |                         | 69  | Control care                                     | 89.90%  | 3.91%  | 77.7 (5.7)     |              | 17.5<br>(5.2)   | 5.4<br>(5.9)   | -               | 13.4<br>(21.2)   |
|  | 60 | Chapman and Toseland 2007 <sup>60</sup>   | Dementia                | 57  | Advanced Illness<br>Care                         | 100.00% | 94.70% | 84.82<br>(6.8) | 8 weeks      | 7.26<br>(7.575) | 0.11<br>(0.14) | 5.49<br>(0.869) | -                |
|  |    |                                           |                         | 61  | Control care                                     | 100.00% | 98.40% | 88.0 (6.7)     |              | 6.8<br>(7.797)  | 0.08<br>(0.08) | 5.66<br>(0.772) | -                |
|  | 61 | Onor, Trevisiol et al. 2007 <sup>61</sup> | Alzheimer's<br>disease  | 8   | Multimodal<br>Rehabilitative<br>Intervention     | 100.00% | 37.50% | 68.0 (6.5)     | 4 months     | 23.12<br>(4.15) | -              | 9.62<br>(3.73)  | -                |
|  |    |                                           |                         | 8   | Control care                                     | 100.00% | 50.00% | 72 (5.2)       |              | 20.00<br>(2.20) | -              | 12.87<br>(4.64) | -                |
|  | 62 | Samus, Johnston et al. 2014 <sup>62</sup> | Cognitive<br>Impairment | 110 | Comprehensive<br>home-based care<br>intervention | 100.00% | 66.40% | 84.0 (5.8)     | 18<br>months | 19.0<br>(7.9)   | 6.5<br>(0.48)  | -               | 6.9<br>(0.58)    |
|  |    |                                           |                         | 193 | Control care                                     | 100.00% | 62.20% | 83.9 (5.9)     |              | 19.2<br>(7.7)   | 6.1<br>(0.37)  | -               | 6.9<br>(0.44)    |
|  | 63 | Eggermont, Knol et al. 2009 <sup>63</sup> | Dementia                | 34  | Hand movements<br>group                          | 88.23%  | -      | 84.4 (5.2)     | 6 weeks      | 15.3<br>(3.2)   | -              | 7.28<br>(5.71)  | -                |
|  |    |                                           |                         | 32  | Control care                                     | 96.87%  |        | 84.1 (4.8)     |              | 16.5<br>(4.7)   | -              | 7.20<br>(5.52)  | -                |
|  | 64 | Hutson, Orrell et al. 2014 <sup>64</sup>  | Dementia                | 21  | Sonas                                            | 95.23%  | 86.10% | 86.6 (6.7)     | 7-8<br>weeks | -               | 5.10<br>(3.34) | -               | 17.20<br>(14.42) |
|  |    |                                           |                         | 18  | Control care                                     | 88.89%  |        |                |              | -               | 5.44<br>(4.82) | -               | 10.06<br>(15.34) |
|  | 65 | Davison, Nayer et al. 2016 <sup>65</sup>  | Dementia                | 8   | Memory Box<br>intervention                       | 100.00% | -      | 86.0 (5.2)     | 8 weeks      | 16.2<br>(4.6)   | 5.7<br>(3.1)   | -               | -                |

|                         |    |                                                     |                         |     |                                                 |         |        |            |          |               |                      |               |                        |
|-------------------------|----|-----------------------------------------------------|-------------------------|-----|-------------------------------------------------|---------|--------|------------|----------|---------------|----------------------|---------------|------------------------|
|                         |    |                                                     |                         | 8   | Control care                                    | 100.00% |        |            |          |               | 5.2<br>(5.9)         | -             | -                      |
|                         | 66 | Bae, Lee et al. 2019 <sup>66</sup>                  | Cognitive<br>Impairment | 41  | multicomponent<br>intervention                  | -       | 43.90% | 75.5 (6.0) | 24 weeks | 27.1<br>(2.1) | -                    | 2.9<br>(2.2)  | -                      |
|                         |    |                                                     |                         | 42  | Control care                                    |         | 52.40% | 76.4 (5.1) |          | 26.7<br>(2.0) | -                    | 2.9<br>(2.7)  | -                      |
| Occupational<br>therapy | 67 | Graff, Vernooij-Dassen et al.<br>2007 <sup>67</sup> | Dementia                | 68  | Community<br>Occupational<br>Therapy            | 85.30%  | 57.40% | 79.1 (6.2) | 6 weeks  | 19.0<br>(5.7) | 8.3<br>(6.2)         | 6.9<br>(3.0)  | -                      |
|                         |    |                                                     |                         | 67  | Control care                                    | 83.60%  | 53.70% | 77.1 (6.3) |          | 19.0<br>(4.0) | 8.1<br>(4.6)         | 7.5<br>(3.0)  | -                      |
|                         | 68 | Lam, Lee et al. 2010 <sup>68</sup>                  | Dementia                | 59  | Case management<br>by occupational<br>therapist | 89.80%  | 59.00% | 78.6 (6.4) | 4 months | 17.6<br>(5.2) | 3.0<br>(1.0,<br>6.0) | -             | 14.0<br>(5.0,<br>29.5) |
|                         |    |                                                     |                         | 43  | Control care                                    | 90.70%  | 56.00% | 78.2 (5.4) |          | 18.0<br>(5.1) | 4.0<br>(1.0,<br>7.0) | -             | 17.0<br>(6.0,<br>35.0) |
|                         | 69 | Wenborn, Challis et al. 2013 <sup>69</sup>          | Dementia                | 104 | Occupational<br>therapy                         | 76.00%  | 63.50% | 84.2 (7.6) | 12 weeks | 5.8 (5.1)     | 7.6<br>(4.6)         | -             | -                      |
|                         |    |                                                     |                         | 106 | Control care                                    | 75.50%  | 70.80% | 84.2 (7.6) |          | 5.5 (4.6)     | 7.4<br>(4.9)         | -             | -                      |
| Music therapy           | 70 | Guetin, Portet et al. 2009 <sup>70</sup>            | Alzheimer's<br>Disease  | 15  | Music therapy                                   | 93.30%  | 86.70% | 85.2 (6)   | 16weeks  | 19.8<br>(4.4) | -                    | 16.7<br>(6.2) | -                      |
|                         |    |                                                     |                         | 15  | Control care                                    | 80.00%  | 60.00% | 86.9 (5.2) |          | 20.7<br>(3.4) | -                    | 11.8<br>(7.4) | -                      |

|                            |    |                                                    |                      |    |                        |         |        |                 |           |                  |                  |                         |                |
|----------------------------|----|----------------------------------------------------|----------------------|----|------------------------|---------|--------|-----------------|-----------|------------------|------------------|-------------------------|----------------|
|                            | 71 | Cooke, Moyle et al. 2010 <sup>71</sup>             | Dementia             | 24 | Music therapy          | 95.80%  | 70.20% | -               | 8 weeks   | 16.51<br>(6.737) | -                | 3.63<br>(2.25,<br>5.00) | -              |
|                            |    |                                                    |                      | 23 | Control care           | 91.30%  |        |                 |           |                  | -                | 3.96<br>(2.61,<br>5.30) | -              |
|                            | 72 | Chu, Yang et al. 2014 <sup>72</sup>                | Dementia             | 52 | Music therapy          | 94.20%  | 53.00% | 82 (6.8)        | 6 weeks   | 12.80<br>(6.15)  | 17.39<br>(9.56)  | -                       | -              |
|                            |    |                                                    |                      | 52 | Control care           | 98.08%  |        |                 |           | 13.76<br>(5.36)  | 15.70<br>(10.16) | -                       | -              |
|                            | 73 | Raglio, Bellandi et al. 2015 <sup>73</sup>         | Dementia             | 40 | Music therapy          | 77.50%  | 72.50% | 81.0 (7.6)      | 10 weeks  | 11.1<br>(5.4)    | -                | -                       | 33.1<br>(16.2) |
|                            |    |                                                    |                      | 40 | Control care           | 87.50%  | 82.50% | 82.4 (6.8)      |           | 11.3<br>(5.3)    | -                | -                       | 36.7<br>(19.2) |
| Pet/robot-assisted therapy | 74 | Joranson, Pedersen et al. 2015 <sup>74</sup>       | Dementia             | 30 | Robot-Assisted therapy | 90.00%  | 70.00% | 83.9 (7.2)      | 12 weeks  | 9.0 (4.9)        | -                | -                       | -              |
|                            |    |                                                    |                      | 30 | Control care           | 86.70%  | 63.30% | 84.1 (6.7)      |           | 6.9 (4.7)        | -                | -                       | -              |
|                            | 75 | Majic, Gutzmann et al. 2013 <sup>75</sup>          | Dementia             | 27 | Pet-Assisted Therapy   | 100.00% | 66.70% | 81.33<br>(10.2) | 10 weeks  | 6.37<br>(5.41)   | -                | -                       | -              |
|                            |    |                                                    |                      | 27 | Control care           | 100.00% | 74.10% | 82.07<br>(8.65) |           | 7.63<br>(5.94)   | -                | -                       | -              |
| Psychosoical therapy       | 76 | Kotynia-English, McGowan et al. 2005 <sup>76</sup> | Cognitive impairment | 53 | Psychosoical therapy   | 86.80%  | 69.80% | 82.9 (6.3)      | 12 months | 16.9<br>(7.7)    | -                | 4.9<br>(3.4)            | 14.2<br>(17.0) |
|                            |    |                                                    |                      | 53 | Control care           | 86.80%  | 64.10% | 84.6 (8.1)      |           | 16.9<br>(7.7)    | -                | 4.8<br>(3.4)            | 15.1<br>(16.0) |

|                      |    |                                                     |                     |     |                                   |         |        |              |           |              |             |             |               |
|----------------------|----|-----------------------------------------------------|---------------------|-----|-----------------------------------|---------|--------|--------------|-----------|--------------|-------------|-------------|---------------|
|                      | 77 | de Rotrou, Cantegreil et al. 2011 <sup>77</sup>     | Alzheimer's disease | 79  | Psychosocial therapy              | 78.50%  | 63.30% | 78.6 (6.1)   | 3 months  | -            | -           | -           | 20.21 (17.67) |
|                      |    |                                                     |                     | 78  | Control care                      | 79.50%  | 56.40% | 78.7 (6.6)   |           | -            | -           | -           | 17.72 (15.91) |
|                      | 78 | Waldorff, Buss et al. 2012 <sup>78</sup>            | Alzheimer's disease | 163 | Psychosocial therapy              | 80.36%  | 53.00% | 76.5 (7.7)   | 6 months  | -            | -           | 4.74 (5.16) | 3.90 (3.61)   |
|                      |    |                                                     |                     | 167 | Control care                      | 86.80%  | 55.00% | 75.9 (6.6)   |           | -            | -           | 4.71 (5.02) | 3.90 (3.65)   |
|                      | 79 | Koivisto, Hallikainen et al. 2016 <sup>79</sup>     | Alzheimer's disease | 84  | Psychosocial therapy              | 64.00%  | 52.00% | 75.8 (7.13)  | 36 months | 21.8 (3.5)   | -           | -           | 8.5 (9.58)    |
|                      |    |                                                     |                     | 152 | Control care                      | 50.00%  | 50.00% | 75.5 (6.19)  |           | 21.3 (3.4)   | -           | -           | 9.1 (9.75)    |
| Reminiscence therapy | 80 | Wang 2007 <sup>80</sup>                             | Dementia            | 51  | Reminiscence therapy              | 86.30%  | 52.90% | 79.76 (6.29) | 8 months  | 14.33 (3.99) | 7.37 (5.09) | 7.09 (3.99) | -             |
|                      |    |                                                     |                     | 51  | Control care                      | 94.12%  | 49.00% | 78.92 (7.64) |           | 14.33 (4.05) | 7.31 (4.98) | 6.61 (3.48) | -             |
|                      | 81 | Lee, Yip et al. 2013 <sup>81</sup>                  | Alzheimer's disease | 7   | Computer-assisted memory training | 100.00% | 85.70% | 77.7 (6.07)  | 6 weeks   | 17.00 (3.58) | -           | 2.17 (1.17) | -             |
|                      |    |                                                     |                     | 6   | Therapist-led memory training     | 100.00% | 50.00% |              |           | 17.67 (4.76) | -           | 1.67 (2.73) | -             |
|                      |    |                                                     |                     | 6   | Control care                      | 100.00% | 66.70% |              |           | 15.29 (2.75) | -           | 2.57 (2.30) | -             |
|                      | 82 | Van Bogaert, Van Grinsven et al. 2013 <sup>82</sup> | Alzheimer's disease | 41  | Individual Reminiscence           | 100.00% | 90.20% | 83           | 4 weeks   | 18.39 (3.4)  | 5.71 (3.6)  | 6.90 (3.3)  | 8.22 (9.4)    |

|            |    |                                               |                      |    |                         |         |        |                  |          |                 |                 |                 |                |
|------------|----|-----------------------------------------------|----------------------|----|-------------------------|---------|--------|------------------|----------|-----------------|-----------------|-----------------|----------------|
|            |    |                                               |                      | 41 | Control care            | 100.00% | 75.60% | 85               |          | 18.27<br>(4.5)  | 5.90<br>(4.8)   | 8.39<br>(3.9)   | 11.07<br>(5.6) |
|            | 83 | Van Bogaert, Tolson et al. 2016 <sup>83</sup> | Dementia             | 36 | Individual Reminiscence | 100.00% | 82.80% | 84               | 10 weeks | 15<br>(11.48)   | -               | -               | 5 (32.14)      |
|            |    |                                               |                      | 36 | Control care            | 100.00% | 77.40% | 84               |          | 18<br>(10.71)   | -               | -               | 3 (13.78)      |
|            | 84 | Duru Asiret and Kapucu 2016 <sup>84</sup>     | Alzheimer's disease  | 31 | Reminiscence therapy    | 100.00% | 67.70% | 81.83<br>(4.87)  | 12 weeks | 15.65<br>(2.49) | -               | 15.61<br>(3.06) | -              |
|            |    |                                               |                      | 31 | Control care            | 100.00% | 67.70% | 82.26<br>(5.07)  |          | 14.16<br>(2.14) | -               | 15.93<br>(4.35) | -              |
|            | 85 | Lopes, Afonso et al. 2016 <sup>85</sup>       | Cognitive impairment | 20 | Reminiscence therapy    | 100.00% | 75.00% | 83.85<br>(6.991) | 5 weeks  | -               | 8.35<br>(8.119) | 1.85<br>(1.387) | -              |
|            |    |                                               |                      | 21 | Control care            | 95.23%  | 76.20% | 83.62<br>(8.352) |          | -               | 9.86<br>(7.136) | 2.52<br>(1.537) | -              |
|            | 86 | Lok, Bademli et al. 2019 <sup>86</sup>        | Alzheimer's disease  | 30 | Reminiscence therapy    | 100.00% | 60.00% | 60+              | 8 weeks  | 18.26<br>(3.69) | 10.66<br>(3.61) | -               | -              |
|            |    |                                               |                      | 30 | Control care            | 100.00% | 53.40% |                  |          | 18.83<br>(3.00) | 11.43<br>(3.78) | -               | -              |
|            | 87 | Munro, Longmire et al. 2012 <sup>87</sup>     | Alzheimer's disease  | 67 | Sertraline 100 mg       | 94.02%  | 54.00% | 79.0             | 24 weeks | 21<br>(16.70)   | -               | -               | -              |
|            |    |                                               |                      | 64 | Placebo                 | 95.31%  |        |                  |          | 19.5<br>(16.8)  | -               | -               | -              |
| Sertraline | 88 | Lyketos, Sheppard et al. 2000 <sup>88</sup>   | Alzheimer's disease  | 12 | Sertraline 150 mg       | 100.00% | 59.00% | 77 (8.4)         | 9 weeks  | 17.4<br>(6.5)   | 21.2<br>(6.4)   | -               | -              |
|            |    |                                               |                      | 10 | Placebo                 | 100.00% |        |                  |          | 14.2<br>(7.3)   | 17.5<br>(2.9)   | -               | -              |



|  |    |                                                |                     |     |                     |         |        |             |          |            |            |   |             |
|--|----|------------------------------------------------|---------------------|-----|---------------------|---------|--------|-------------|----------|------------|------------|---|-------------|
|  | 89 | Lyketsos, Delcampo et al. 2003 <sup>89</sup>   | Alzheimer's disease | 24  | Sertraline 95 mg    | 87.50%  | 83.00% | 75.5 (9.5)  | 12 weeks | 17.5 (6.3) | 18.1 (3.9) | - | 36.8 (22.1) |
|  |    |                                                |                     | 20  | Placebo             | 75.00%  |        | 79.9 (5.2)  |          | 16.3 (6.8) | 20.2 (5.4) | - | 34.9 (14.8) |
|  | 90 | Banerjee, Hellier et al. 2011 <sup>90</sup>    | Dementia            | 107 | Sertraline 150 mg   | 63.50%  | 50.00% | 80 (8.4)    | 39 weeks | 18.5 (6.7) | 12.8 (3.6) | - | 26.9 (16.8) |
|  |    |                                                |                     | 111 | Placebo             | 73.90%  | 68.00% | 79 (8.8)    |          | 18.2 (7.4) | 13.6 (5.2) | - | 30.2 (17.6) |
|  | 91 | Mokhber, Abdollahian et al. 2014 <sup>91</sup> | Alzheimer's disease | 20  | Sertraline 150 mg   | 100.00% | 64.00% | 67.3 (3.0)  | 12 weeks | 15.05      | -          | - | -           |
|  |    |                                                |                     | 20  | Venlafaxine 37.5 mg | 100.00% | 33.50% | 67.9 (2.8)  |          | 14.7       | -          | - | -           |
|  | 92 | Zuidersma, Chua et al. 2019 <sup>92</sup>      | Alzheimer's disease | 12  | Mirtazapine 45g     | 83.33%  | 64.50% | 78.0 (10.4) | 13 weeks | -          | 19.0 (3.6) | - | -           |
|  |    |                                                |                     | 8   | Sertraline 150mg    | 75.00%  |        |             |          | -          | 19.3 (2.1) | - | -           |
|  |    |                                                |                     | 13  | Placebo             | 84.60%  |        |             |          | -          | 22.8 (7.2) | - | -           |
|  |    |                                                | Alzheimer's disease | 28  | Mirtazapine 45g     | 78.60%  | 62.80% | 79.1 (7.9)  |          | -          | -          | - | -           |
|  |    |                                                |                     | 29  | Sertraline 150mg    | 86.20%  |        |             |          | -          | -          | - | -           |
|  |    |                                                |                     | 28  | Placebo             | 78.60%  |        |             |          | -          | -          | - | -           |
|  |    |                                                | Alzheimer's disease | 42  | Mirtazapine 45g     | 78.60%  | 64.30% | 79.5 (8.6)  |          | -          | -          | - | -           |
|  |    |                                                |                     | 42  | Sertraline 150mg    | 66.70%  |        |             |          | -          | -          | - | -           |
|  |    |                                                |                     | 45  | Placebo             | 88.90%  |        |             |          | -          | -          | - | -           |

|             |    |                                                             |                     |    |                   |         |         |             |          |                 |              |             |   |
|-------------|----|-------------------------------------------------------------|---------------------|----|-------------------|---------|---------|-------------|----------|-----------------|--------------|-------------|---|
|             |    |                                                             | Alzheimer's disease | 24 | Mirtazapine 45g   | 87.50%  | 80.50%  | 80.1 (98.1) |          | -               | -            | -           | - |
|             |    |                                                             |                     | 27 | Sertraline 150mg  | 70.40%  |         |             |          | -               | -            | -           | - |
|             |    |                                                             |                     | 24 | Placebo           | 83.33%  |         |             |          | -               | -            | -           | - |
|             | 93 | Oslin, Ten Have et al. 2003 <sup>93</sup>                   | Dementia            | 25 | Sertraline 100mg  | 100.00% | 56.00%  | 83.8 (9.8)  | 10 weeks | 21.9 (4.9)      | 20.9 (4.4)   | 16.9 (6.2)  | - |
|             |    |                                                             |                     | 27 | Venlafaxine 150mg | 100.00% | 33.00%  | 81.2 (10.8) |          | 22.0 (5.4)      | 20.2 (4.1)   | 17.1 (5.8)  | - |
|             | 94 | Magai, Kennedy et al. 2000 <sup>94</sup>                    | Alzheimer's disease | 17 | Sertraline 100mg  | 100.00% | 100.00% | 88.4 (6.1)  | 8 weeks  | -               | 5.93 (1.94)  | 0.53 (0.92) | - |
|             |    |                                                             |                     | 14 | Placebo           | 100.00% | 100.00% | 90.1 (6.5)  |          | -               | 6.33 (2.31)  | 1.00 (0.95) | - |
|             | 95 | Weintraub, Rosenberg et al. 2010 <sup>95</sup>              | Alzheimer's disease | 67 | Sertraline 100mg  | 95.50%  | 54.00%  | 79.0        | 24 weeks | 21 (17-25)      | -            | -           | - |
|             |    |                                                             |                     | 64 | Placebo           | 93.80%  |         |             |          | 19.5 (15-23.25) | -            | -           | - |
|             | 96 | Rosenberg, Drye et al. 2010 <sup>96</sup>                   | Alzheimer's disease | 67 | Sertraline 100mg  | 98.50%  | 59.70%  | 76.5 (8.0)  | -        | -               | -            | -           | - |
|             |    |                                                             |                     | 64 | Placebo           | 98.40%  | 48.40%  | 78.2 (8.0)  |          | -               | -            | -           | - |
| Venlafaxine | 97 | de Vasconcelos Cunha, Lopes Rocha et al. 2007 <sup>97</sup> | Dementia            | 14 | Venlafaxine 75 mg | 57.14%  |         | 77.6 (7.3)  | 6 weeks  | 20.6 (4.5)      | 13 (9, 19)   | -           | - |
|             |    |                                                             |                     | 17 | Placebo           | 82.40%  | 64.70%  | 77.6 (5.8)  |          | 19.3 (4.8)      | 13 (9.5, 17) | -           | - |

|               |     |                                                  |                     |    |                    |         |        |            |         |             |   |   |   |
|---------------|-----|--------------------------------------------------|---------------------|----|--------------------|---------|--------|------------|---------|-------------|---|---|---|
| Imipramine    | 98  | REIFLER, BV et al. 1989 <sup>98</sup>            | Alzheimer's disease | 13 | Imipramine 25mg    | 100.00% | -      | 72 (8)     | 8 weeks | 16.9 (4.6)  | - | - | - |
|               |     |                                                  |                     | 15 | Placebo            | 100.00% |        |            |         | 18 (5.5)    | - | - | - |
|               |     |                                                  | Alzheimer's disease | 14 | Imipramine 25mg    | 100.00% |        |            |         | 13.4 (6.9)  | - | - | - |
|               |     |                                                  |                     | 19 | Placebo            | 100.00% |        |            |         | 14.8 (15.1) | - | - | - |
|               | 99  | Linda, Reifler et al. 1991 <sup>99</sup>         | Alzheimer's disease | 13 | Imipramine 25mg    | 100.00% | 76.90% | 76 (7)     | 8 weeks | -           | - | - | - |
|               |     |                                                  |                     | 15 | Placebo            | 100.00% | 60.00% | 71 (9)     |         | -           | - | - | - |
|               |     |                                                  | Alzheimer's disease | 14 | Imipramine 25mg    | 100.00% | 50.00% | 68 (7)     |         | -           | - | - | - |
|               |     |                                                  |                     | 19 | Placebo            | 100.00% | 52.60% | 71 (8)     |         | -           | - | - | - |
| Fluoxetine    | 100 | Taragano, Lyketsos et al. 1997 <sup>100</sup>    | Alzheimer's disease | 18 | Fluoxetine 10mg    | 100.00% | 77.80% | 71.7 (5.0) | 45 days | 20.0 (3.2)  | - | - | - |
|               |     |                                                  |                     | 19 | Amitriptyline 25mg | 100.00% | 78.90% | 72.4 (4.9) |         | 18.8 (4.2)  | - | - | - |
|               | 101 | Petracca, Chemerinski et al. 2001 <sup>101</sup> | Alzheimer's disease | 17 | Fluoxetine 40mg    | 88.20%  | 47.00% | 70.2 (6.3) | 6 weeks | 23.2 (4.5)  | - | - | - |
|               |     |                                                  |                     | 24 | Placebo            | 83.30%  | 71.00% | 71.3 (6.9) |         | 23.2 (5.3)  | - | - | - |
|               | 102 | Auchus and Bissey-Black 1997 <sup>102</sup>      | Alzheimer's disease | 6  | Fluoxetine 40mg    | 100.00% | 66.70% | 75.6 (7.5) | 7 weeks | 15.2 (4.6)  | - | - | - |
|               |     |                                                  |                     | 6  | Placebo            | 100.00% | 66.70% |            |         | -           | - | - | - |
| Amitriptyline | 103 | Reding, Young et al. 1983 <sup>103</sup>         | Alzheimer's disease | 9  | Amitriptyline 25mg | 100.00% | 63.60% | 68.0       | 6 weeks | 18 (3)      | - | - | - |

|                                    |     |                                               |                      |     |                        |         |        |              |           |              |             |              |               |
|------------------------------------|-----|-----------------------------------------------|----------------------|-----|------------------------|---------|--------|--------------|-----------|--------------|-------------|--------------|---------------|
|                                    |     |                                               |                      | 8   | Placebo                | 100.00% |        |              |           | 16 (3)       | -           | -            | -             |
| Rivastigmine                       | 104 | Moretti, Torre et al. 2003 <sup>104</sup>     | Vascular dementia    | 104 | Rivastigmine 3-6mg     | 100.00% | 52.90% | 75.67 (2.98) | 12 months | 19.75 (2.38) | -           | 13.46 (3.01) | -             |
|                                    |     |                                               |                      | 104 | Placebo                | 100.00% |        |              |           | 20.23 (2.45) | -           | 13.44 (2.31) | -             |
|                                    | 105 | Mowla, Mosavinasab et al. 2007 <sup>105</sup> | Alzheimer's disease  | 41  | Rivastigmine 6-12 mg   | 82.90%  | 53.50% | 69.2         | 12 weeks  | 16.3 (4.1)   | -           | -            | -             |
|                                    |     |                                               |                      | 40  | Placebo                | 80.00%  |        |              |           | 16.5 (3.6)   | -           | -            | -             |
|                                    | 106 | Nasab, Bahrammi et al. 2012 <sup>105</sup>    | Alzheimer's dementia | 28  | Rivastigmine 4.5 mg    | 76.00%  | 57.60% | 65.72 (4.69) | 24 weeks  | -            | -           | -            | -             |
|                                    |     |                                               |                      | 28  | EGB 761 120 mg         | 80.00%  | 52.00% | 66.03 (4.64) |           | -            | -           | -            | -             |
| Discontinuation of antidepressants | 107 | Bergh, Selbaek et al. 2012 <sup>106</sup>     | Dementia             | 63  | Discontinued treatment | 56.00%  | 78.00% | 85.3 (8.2)   | 25 weeks  | -            | 1.28 (1.71) | -            | 17.78 (16.75) |
|                                    |     |                                               |                      | 65  | Continued treatment    | 71.00%  | 72.00% | 86.1 (6.7)   |           | -            | 1.95 (2.40) | -            | 17.63 (14.09) |

## Reference

1. Husebo BS, Ballard C, Fritze F, Sandvik RK, Aarsland D. Efficacy of pain treatment on mood syndrome in patients with dementia: a randomized clinical trial. *International Journal of Geriatric Psychiatry*. 2013;29(8):828-836.
2. Husebo BS, Ballard C, Sandvik R, Nilsen OB, Aarsland D. Efficacy of treating pain to reduce behavioural disturbances in residents of nursing homes with

dementia: cluster randomised clinical trial. *BMJ*. 2011;343:d4065.

3. Streim JE, Porsteinsson AP, Breder CD, et al. A randomized, double-blind, placebo-controlled study of aripiprazole for the treatment of psychosis in nursing home patients with Alzheimer disease. *American Journal of Geriatric Psychiatry Official Journal of the American Association for Geriatric Psychiatry*. 2008;16(7):537.
4. Mintzer JE, Tune LE, Breder CD, et al. Aripiprazole for the treatment of psychoses in institutionalized patients with Alzheimer dementia: a multicenter, randomized, double-blind, placebo-controlled assessment of three fixed doses. *American Journal of Geriatric Psychiatry Official Journal of the American Association for Geriatric Psychiatry*. 2007;15(11):918-931.
5. De Deyn P, Jeste DV, Swanink R, et al. Aripiprazole for the treatment of psychosis in patients with Alzheimer's disease: a randomized, placebo-controlled study. *J Clin Psychopharmacol*. 2005;25(5):463-467.
6. Travers C. Increasing enjoyable activities to treat depression in nursing home residents with dementia: A pilot study. *Dementia*. 2016;16(2):204-218.
7. Linda T, Logsdon RG, Jay U, McCurry SM. Behavioral Treatment of Depression in Dementia Patients: A Controlled Clinical Trial. *Journals of Gerontology*. 1997(4):P159-166.
8. Lichtenberg PA, Kemp-Havican J, Macneill SE, Schafer Johnson A. Pilot study of behavioral treatment in dementia care units. *Gerontologist*. 45(3):406-410.
9. Lam LC, Lui VW, Luk DN, et al. Effectiveness of an individualized functional training program on affective disturbances and functional skills in mild and moderate dementia--a randomized control trial. *Int J Geriatr Psychiatry*. 2010;25(2):133-141.
10. Verkaik R, Francke AL, van Meijel B, Spreeuwenberg PM, Ribbe MW, Bensing JM. The effects of a nursing guideline on depression in psychogeriatric nursing home residents with dementia. *Int J Geriatr Psychiatry*. 2011;26(7):723-732.
11. Tse MMY, Lau JL, Kwan R, et al. Effects of play activities program for nursing home residents with dementia on pain and psychological well-being: Cluster randomized controlled trial. *Geriatr Gerontol Int*. 2018;18(10):1485-1490.
12. Todri J, Todri A, Lena O. Why Not a Global Postural Reeducation as an Alternative Therapy Applied to Alzheimer's Patients in Nursing Homes? A Pioneer Randomized Controlled Trial. *Dement Geriatr Cogn Disord*. 2019;48(3-4):172-179.
13. Teri L, Gibbons LE, McCurry SM, et al. Exercise plus behavioral management in patients with Alzheimer disease: a randomized controlled trial. *Jama*. 2003;290(15):2015-2022.
14. Woods B, Thorgrimsen L, Spector A, Royan L, Orrell M. Improved quality of life and cognitive stimulation therapy in dementia. *Aging & Mental Health*. 2006;10(3):219-226.
15. Yi-Xuan, Niu, Ji-Ping, et al. Cognitive stimulation therapy in the treatment of neuropsychiatric symptoms in Alzheimer's disease: a randomized controlled

trial. *Clinical Rehabilitation*. 2010;24(12):1102-1111.

16. Buschert VC, Friese U, Teipel SJ, et al. Effects of a newly developed cognitive intervention in amnesic mild cognitive impairment and mild Alzheimer's disease: a pilot study. *J Alzheimers Dis*. 2011;25(4):679-694.
17. Maci T, Pira FL, Quattrocchi G, Nuovo SD, Perciavalle V, Zappia M. Physical and cognitive stimulation in Alzheimer Disease. the GAIA Project: a pilot study. *Am J Alzheimers Dis Other Dement*. 2012;27(2):107-113.
18. Bergamaschi S, Arcara G, Calza A, Villani D, Orgeta V, Mondini S. One-year repeated cycles of cognitive training (CT) for Alzheimer's disease. *Aging Clin Exp Res*. 2013;25(4):421-426.
19. Jha A, Jan F, Gale T, Newman C. Effectiveness of a recovery-orientated psychiatric intervention package on the wellbeing of people with early dementia: a preliminary randomised controlled trial. *Int J Geriatr Psychiatry*. 2013;28(6):589-596.
20. Stanley MA, Calleo J, Bush AL, et al. The peaceful mind program: a pilot test of a cognitive-behavioral therapy-based intervention for anxious patients with dementia. *Am J Geriatr Psychiatry*. 2013;21(7):696-708.
21. Orgeta V, Leung P, Yates L, et al. Individual cognitive stimulation therapy for dementia: a clinical effectiveness and cost-effectiveness pragmatic, multicentre, randomised controlled trial. *Health Technol Assess*. 2015;19(64):1-108.
22. Amieva H, Robert PH, Grandoulier A-S, et al. Group and individual cognitive therapies in Alzheimer's disease: the ETNA3 randomized trial. *International Psychogeriatrics*. 2015;28(5):707-717.
23. Capotosto E, Belacchi C, Gardini S, et al. Cognitive stimulation therapy in the Italian context: its efficacy in cognitive and non-cognitive measures in older adults with dementia. *Int J Geriatr Psychiatry*. 2017;32(3):331-340.
24. Churcher Clarke A, Chan JMY, Stott J, Royan L, Spector A. An adapted mindfulness intervention for people with dementia in care homes: feasibility pilot study. *Int J Geriatr Psychiatry*. 2017;32(12):e123-e131.
25. Khedr EM, Salama RH, Abdel Hameed M, Abo Elfetoh N, Seif P. Therapeutic Role of Transcranial Direct Current Stimulation in Alzheimer Disease Patients: Double-Blind, Placebo-Controlled Clinical Trial. *Neurorehabil Neural Repair*. 2019;33(5):384-394.
26. Luijpen MW, Swaab DF, Sergeant JA, Scherder EJ. Effects of transcutaneous electrical nerve stimulation (TENS) on self-efficacy and mood in elderly with mild cognitive impairment. *Neurorehabil Neural Repair*. 2004;18(3):166-175.
27. Nyth AL, Gottfries CG. The clinical efficacy of citalopram in treatment of emotional disturbances in dementia disorders. A Nordic multicentre study. *British Journal of Psychiatry the Journal of Mental ence*. 1990;157(6):894.
28. Nyth AL, Gottfries CG, Lyby K, et al. A controlled multicenter clinical study of citalopram and placebo in elderly depressed patients with and without

concomitant dementia. *Acta Psychiatr Scand*. 1992;86(2):138-145.

29. An H, Choi B, Park KW, et al. The Effect of Escitalopram on Mood and Cognition in Depressive Alzheimer's Disease Subjects. *J Alzheimers Dis*. 2017;55(2):727-735.
30. Porsteinsson AP, Drye LT, Pollock BG, et al. Effect of citalopram on agitation in Alzheimer disease: the CitAD randomized clinical trial. *JAMA*. 2014;311(7):682-691.
31. Devanand DP, Pelton GH, D'Antonio K, et al. Donepezil Treatment in Patients With Depression and Cognitive Impairment on Stable Antidepressant Treatment: A Randomized Controlled Trial. *Am J Geriatr Psychiatry*. 2018;26(10):1050-1060.
32. Yancheva S, Ihl R, Nikolova G, et al. Ginkgo biloba extract EGb 761(R), donepezil or both combined in the treatment of Alzheimer's disease with neuropsychiatric features: a randomised, double-blind, exploratory trial. *Aging Ment Health*. 2009;13(2):183-190.
33. Reynolds CF, 3rd, Butters MA, Lopez O, et al. Maintenance treatment of depression in old age: a randomized, double-blind, placebo-controlled evaluation of the efficacy and safety of donepezil combined with antidepressant pharmacotherapy. *Arch Gen Psychiatry*. 2011;68(1):51-60.
34. Van Dongen MCJM, Van Rossum E, Kessels AGH, Sielhorst HJG, Knipschild PG. The efficacy of ginkgo for elderly people with dementia and age-associated memory impairment: new results of a randomized clinical trial. *Journal of the American Geriatrics Society*. 2000;48(10):1183-1194.
35. Napryeyenko O, Sonnik G, Tartakovsky I. Efficacy and tolerability of Ginkgo biloba extract EGb 761 by type of dementia: analyses of a randomised controlled trial. *J Neurol Sci*. 2009;283(1-2):224-229.
36. Kanowski S, Hoerr R. Ginkgo biloba extract EGb 761 in dementia: intent-to-treat analyses of a 24-week, multi-center, double-blind, placebo-controlled, randomized trial. *Pharmacopsychiatry*. 2003;36(6):297-303.
37. Napryeyenko O, Borzenko I. Ginkgo biloba special extract in dementia with neuropsychiatric features. A randomised, placebo-controlled, double-blind clinical trial. *Arzneimittelforschung*. 2007;57(1):4-11.
38. Liu IT, Lee WJ, Lin SY, Chang ST, Kao CL, Cheng YY. Therapeutic Effects of Exercise Training on Elderly Patients With Dementia: A Randomized Controlled Trial. *Arch Phys Med Rehabil*. 2020;101(5):762-769.
39. Rolland Y, Pillard F, Klapouszczak A, et al. Exercise program for nursing home residents with Alzheimer's disease: a 1-year randomized, controlled trial. *J Am Geriatr Soc*. 2007;55(2):158-165.
40. Bostrom G, Conradsson M, Hornsten C, et al. Effects of a high-intensity functional exercise program on depressive symptoms among people with dementia in residential care: a randomized controlled trial. *Int J Geriatr Psychiatry*. 2016;31(8):868-878.
41. Cancela JM, Ayan C, Varela S, Seijo M. Effects of a long-term aerobic exercise intervention on institutionalized patients with dementia. *J Sci Med Sport*.

2016;19(4):293-298.

42. Hoffmann K, Sobol NA, Frederiksen KS, et al. Moderate-to-High Intensity Physical Exercise in Patients with Alzheimer's Disease: A Randomized Controlled Trial. *J Alzheimers Dis.* 2016;50(2):443-453.
43. Chen KM, Kuo CC, Chang YH, Huang HT, Cheng YY. Resistance Band Exercises Reduce Depression and Behavioral Problems of Wheelchair-Bound Older Adults with Dementia: A Cluster-Randomized Controlled Trial. *J Am Geriatr Soc.* 2017;65(2):356-363.
44. Morris JK, Vidoni ED, Johnson DK, et al. Aerobic exercise for Alzheimer's disease: A randomized controlled pilot trial. *PLoS One.* 2017;12(2):e0170547.
45. Henskens M, Nauta IM, van Eekeren MCA, Scherder EJA. Effects of Physical Activity in Nursing Home Residents with Dementia: A Randomized Controlled Trial. *Dement Geriatr Cogn Disord.* 2018;46(1-2):60-80.
46. Song D, Yu DSF. Effects of a moderate-intensity aerobic exercise programme on the cognitive function and quality of life of community-dwelling elderly people with mild cognitive impairment: A randomised controlled trial. *Int J Nurs Stud.* 2019;93:97-105.
47. Lam LC, Chan WC, Leung T, Fung AW, Leung EM. Would older adults with mild cognitive impairment adhere to and benefit from a structured lifestyle activity intervention to enhance cognition?: a cluster randomized controlled trial. *PLoS One.* 2015;10(3):e0118173.
48. Cheng ST, Chow PK, Yu EC, Chan AC. Leisure activities alleviate depressive symptoms in nursing home residents with very mild or mild dementia. *Am J Geriatr Psychiatry.* 2012;20(10):904-908.
49. Lam LC, Chau RC, Wong BM, et al. A 1-year randomized controlled trial comparing mind body exercise (Tai Chi) with stretching and toning exercise on cognitive function in older Chinese adults at risk of cognitive decline. *J Am Med Dir Assoc.* 2012;13(6):568 e515-520.
50. Wang P, Liao S, Liu R, et al. Effects of estrogen on cognition, mood, and cerebral blood flow in AD: a controlled study. *Neurology.* 2000;54(11):2061-2066.
51. Valen-Sendstad A, Engedal K, Stray-Pedersen B, et al. Effects of hormone therapy on depressive symptoms and cognitive functions in women with Alzheimer disease: a 12 month randomized, double-blind, placebo-controlled study of low-dose estradiol and norethisterone. *The American Journal of Geriatric Psychiatry.* 2010;18(1):11-20.
52. Dowling GA, Graf CL, Hubbard EM, Luxenberg JS. Light treatment for neuropsychiatric behaviors in Alzheimer's disease. *Western journal of nursing research.* 2007;29(8):961-975.
53. Riemersma-Van Der Lek RF, Swaab DF, Twisk J, Hol EM, Hoogendijk WJ, Van Someren EJ. Effect of bright light and melatonin on cognitive and noncognitive function in elderly residents of group care facilities: a randomized controlled trial. *Jama.* 2008;299(22):2642-2655.
54. Burns A, Allen H, Tomenson B, Duignan D, Byrne J. Bright light therapy for agitation in dementia: a randomized controlled trial. *Int Psychogeriatr.* 2009;21(4):711-721.



55. Yang YP, Wang CJ, Wang JJ. Effect of aromatherapy massage on agitation and depressive mood in individuals with dementia. *Journal of gerontological nursing*. 2016;42(9):38-46.
56. Lanza G, Centonze SS, Destro G, et al. Shiatsu as an adjuvant therapy for depression in patients with Alzheimer's disease: A pilot study. *Complement Ther Med*. 2018;38:74-78.
57. Moyle W, Cooke ML, Beattie E, Shum DH, O'Dwyer ST, Barrett S. Foot massage versus quiet presence on agitation and mood in people with dementia: a randomised controlled trial. *Int J Nurs Stud*. 2014;51(6):856-864.
58. Baldwin R, Pratt H, Goring H, Marriott A, Roberts C. Does a nurse-led mental health liaison service for older people reduce psychiatric morbidity in acute general medical wards? A randomised controlled trial. *Age Ageing*. 2004;33(5):472-478.
59. Callahan CM, Boustani MA, Unverzagt FW, et al. Effectiveness of collaborative care for older adults with Alzheimer disease in primary care: a randomized controlled trial. *Jama*. 2006;295(18):2148-2157.
60. Chapman DG, Toseland RW. Effectiveness of advanced illness care teams for nursing home residents with dementia. *Social Work*. 2007;52(4):321-329.
61. Onor ML, Trevisiol M, Negro C, Signorini A, Saina M, Aguglia E. Impact of a multimodal rehabilitative intervention on demented patients and their caregivers. *Am J Alzheimers Dis Other Demen*. 2007;22(4):261-272.
62. Samus QM, Johnston D, Black BS, et al. A multidimensional home-based care coordination intervention for elders with memory disorders: the maximizing independence at home (MIND) pilot randomized trial. *Am J Geriatr Psychiatry*. 2014;22(4):398-414.
63. Eggermont LH, Knol DL, Hol EM, Swaab DF, Scherder EJ. Hand motor activity, cognition, mood, and the rest-activity rhythm in dementia: a clustered RCT. *Behav Brain Res*. 2009;196(2):271-278.
64. Hutson C, Orrell M, Dugmore O, Spector A. Sonas: a pilot study investigating the effectiveness of an intervention for people with moderate to severe dementia. *Am J Alzheimers Dis Other Demen*. 2014;29(8):696-703.
65. Davison TE, Nayer K, Coxon S, et al. A personalized multimedia device to treat agitated behavior and improve mood in people with dementia: A pilot study. *Geriatr Nurs*. 2016;37(1):25-29.
66. Bae S, Lee S, Lee S, et al. The effect of a multicomponent intervention to promote community activity on cognitive function in older adults with mild cognitive impairment: A randomized controlled trial. *Complement Ther Med*. 2019;42:164-169.
67. Graff MJ, Vernooij-Dassen MJ, Thijssen M, Dekker J, Hoefnagels WH, OldeRikkert MG. Effects of community occupational therapy on quality of life, mood, and health status in dementia patients and their caregivers: a randomized controlled trial. *The Journals of Gerontology Series A: Biological Sciences and Medical Sciences*. 2007;62(9):1002-1009.

68. Lam LC, Lee JS, Chung JC, Lau A, Woo J, Kwok TC. A randomized controlled trial to examine the effectiveness of case management model for community dwelling older persons with mild dementia in Hong Kong. *Int J Geriatr Psychiatry*. 2010;25(4):395-402.
69. Wenborn J, Challis D, Head J, et al. Providing activity for people with dementia in care homes: a cluster randomised controlled trial. *Int J Geriatr Psychiatry*. 2013;28(12):1296-1304.
70. Guetin S, Portet F, Picot MC, et al. Effect of music therapy on anxiety and depression in patients with Alzheimer's type dementia: randomised, controlled study. *Dement Geriatr Cogn Disord*. 2009;28(1):36-46.
71. Cooke M, Moyle W, Shum D, Harrison S, Murfield J. A randomized controlled trial exploring the effect of music on quality of life and depression in older people with dementia. *J Health Psychol*. 2010;15(5):765-776.
72. Chu H, Yang CY, Lin Y, et al. The impact of group music therapy on depression and cognition in elderly persons with dementia: a randomized controlled study. *Biol Res Nurs*. 2014;16(2):209-217.
73. Raglio A, Bellandi D, Baiardi P, et al. Effect of Active Music Therapy and Individualized Listening to Music on Dementia: A Multicenter Randomized Controlled Trial. *J Am Geriatr Soc*. 2015;63(8):1534-1539.
74. Joranson N, Pedersen I, Rokstad AM, Ihlebaek C. Effects on Symptoms of Agitation and Depression in Persons With Dementia Participating in Robot-Assisted Activity: A Cluster-Randomized Controlled Trial. *J Am Med Dir Assoc*. 2015;16(10):867-873.
75. Majic T, Gutzmann H, Heinz A, Lang UE, Rapp MA. Animal-assisted therapy and agitation and depression in nursing home residents with dementia: a matched case-control trial. *Am J Geriatr Psychiatry*. 2013;21(11):1052-1059.
76. Kotynia-English R, McGowan H, Almeida OP. A randomized trial of early psychiatric intervention in residential care: impact on health outcomes. *Int Psychogeriatr*. 2005;17(3):475-485.
77. de Rotrou J, Cantegreil I, Faucounau V, et al. Do patients diagnosed with Alzheimer's disease benefit from a psycho-educational programme for family caregivers? A randomised controlled study. *Int J Geriatr Psychiatry*. 2011;26(8):833-842.
78. Waldorff FB, Buss DV, Eckermann A, et al. Efficacy of psychosocial intervention in patients with mild Alzheimer's disease: the multicentre, rater blinded, randomised Danish Alzheimer Intervention Study (DAISY). *BMJ*. 2012;345:e4693.
79. Koivisto AM, Hallikainen I, Valimaki T, et al. Early psychosocial intervention does not delay institutionalization in persons with mild Alzheimer disease and has impact on neither disease progression nor caregivers' well-being: ALSOVA 3-year follow-up. *Int J Geriatr Psychiatry*. 2016;31(3):273-283.
80. Wang JJ. Group reminiscence therapy for cognitive and affective function of demented elderly in Taiwan. *Int J Geriatr Psychiatry*. 2007;22(12):1235-1240.
81. Lee GY, Yip CC, Yu EC, Man DW. Evaluation of a computer-assisted errorless learning-based memory training program for patients with early Alzheimer's

disease in Hong Kong: a pilot study. *Clin Interv Aging*. 2013;8:623-633.

82. Van Bogaert P, Van Grinsven R, Tolson D, Wouters K, Engelborghs S, Van der Mussele S. Effects of SolCos model -based individual reminiscence on older adults with mild to moderate dementia due to Alzheimer disease: a pilot study. *J Am Med Dir Assoc*. 2013;14(7):528 e529-513.
83. Van Bogaert P, Tolson D, Eerlingen R, et al. SolCos model-based individual reminiscence for older adults with mild to moderate dementia in nursing homes: a randomized controlled intervention study. *J Psychiatr Ment Health Nurs*. 2016;23(9-10):568-575.
84. Duru Asiret G, Kapucu S. The Effect of Reminiscence Therapy on Cognition, Depression, and Activities of Daily Living for Patients With Alzheimer Disease. *J Geriatr Psychiatry Neurol*. 2016;29(1):31-37.
85. Lopes TS, Afonso RM, Ribeiro OM. A quasi-experimental study of a reminiscence program focused on autobiographical memory in institutionalized older adults with cognitive impairment. *Arch Gerontol Geriatr*. 2016;66:183-192.
86. Lok N, Bademli K, Selcuk-Tosun A. The effect of reminiscence therapy on cognitive functions, depression, and quality of life in Alzheimer patients: Randomized controlled trial. *Int J Geriatr Psychiatry*. 2019;34(1):47-53.
87. Munro CA, Longmire CF, Drye LT, et al. Cognitive outcomes after sertraline treatment in patients with depression of Alzheimer disease. *Am J Geriatr Psychiatry*. 2012;20(12):1036-1044.
88. Lyketsos CG, Sheppard JME, Steele CD, et al. Randomized, placebo-controlled, double-blind clinical trial of sertraline in the treatment of depression complicating Alzheimer's disease: initial results from the Depression in Alzheimer's Disease study. *American Journal of Psychiatry*. 2000;157(10):1686-1689.
89. Lyketsos CG, Delcampo L, Steinberg M, et al. Treating Depression in Alzheimer Disease. *Archives of General Psychiatry*. 2003;60(7):737-746.
90. Banerjee S, Hellier J, Dewey M, et al. Sertraline or mirtazapine for depression in dementia (HTA-SADD): a randomised, multicentre, double-blind, placebo-controlled trial. *The Lancet*. 2011;378(9789):403-411.
91. Mokhber N, Abdollahian E, Soltanifar A, et al. Comparison of sertraline, venlafaxine and desipramine effects on depression, cognition and the daily living activities in Alzheimer patients. *Pharmacopsychiatry*. 2014;47(4-5):131-140.
92. Zuidersma M, Chua KC, Hellier J, Voshaar RO, Banerjee S, Group H-SI. Sertraline and Mirtazapine Versus Placebo in Subgroups of Depression in Dementia: Findings From the HTA-SADD Randomized Controlled Trial. *Am J Geriatr Psychiatry*. 2019;27(9):920-931.
93. Oslin DW, Ten Have TR, Streim JE, et al. Probing the safety of medications in the frail elderly: evidence from a randomized clinical trial of sertraline and venlafaxine in depressed nursing home residents. *J Clin Psychiatry*. 2003;64(8):875-882.
94. Magai C, Kennedy G, Cohen CI, Gomberg D. A controlled clinical trial of sertraline in the treatment of depression in nursing home patients with late-stage Alzheimer's disease. *Am J Geriatr Psychiatry*. 2000;8(1):66-74.

95. Weintraub D, Rosenberg PB, Drye LT, et al. Sertraline for the treatment of depression in Alzheimer disease: week-24 outcomes. *Am J Geriatr Psychiatry*. 2010;18(4):332-340.
96. Rosenberg PB, Drye LT, Martin BK, et al. Sertraline for the treatment of depression in Alzheimer disease. *Am J Geriatr Psychiatry*. 2010;18(2):136-145.
97. de Vasconcelos Cunha UG, Lopes Rocha F, Avila de Melo R, et al. A placebo-controlled double-blind randomized study of venlafaxine in the treatment of depression in dementia. *Dement Geriatr Cogn Disord*. 2007;24(1):36-41.
98. Reifler B. Double-blind trial of imipramine in Alzheimer's disease patients with and without depression. *American Journal of Psychiatry*. 1989;146.
99. Linda T, Reifler BV, Veith RC, et al. Imipramine in the treatment of depressed Alzheimer's patients: impact on cognition. *Journal of Gerontology*. (6):372-377.
100. Taragano FE, Lyketsos CG, Mangone CA, Allegri RF, Comesaña-Díaz E. A Double-Blind, Randomized, Fixed-Dose Trial of Fluoxetine vs. Amitriptyline in the Treatment of Major Depression Complicating Alzheimer's Disease. *Psychosomatics*. 1997;38(3):246-252.
101. Petracca GM, Chemerinski E, Starkstein SE. A double-blind, placebo-controlled study of fluoxetine in depressed patients with Alzheimer's disease. *International Psychogeriatrics*. 2001;13(2):233-240.
102. Auchus AP, Bissey-Black C. Pilot study of haloperidol, fluoxetine, and placebo for agitation in Alzheimer's disease. *The Journal of neuropsychiatry and clinical neurosciences*. 1997;9(4):591-593.
103. Reding MJ, Young R, Diponte P. Amitriptyline in Alzheimer's disease. *Neurology*. 1983;33(4):522-523.
104. Moretti R, Torre P, Antonello RM, Cazzato G, Bava A. Rivastigmine in subcortical vascular dementia: a randomized, controlled, open 12-month study in 208 patients. *Am J Alzheimers Dis Other Dement*. 2003;18(5):265-272.
105. Mowla A, Mosavinasab M, Haghshenas H, Borhani Haghighi A. Does serotonin augmentation have any effect on cognition and activities of daily living in Alzheimer's dementia? A double-blind, placebo-controlled clinical trial. *J Clin Psychopharmacol*. 2007;27(5):484-487.
106. Bergh S, Selbaek G, Engedal K. Discontinuation of antidepressants in people with dementia and neuropsychiatric symptoms (DESEP study): double blind, randomised, parallel group, placebo controlled trial. *BMJ*. 2012;344:e1566.
